# Supplementary material for: Measurement characteristics and correlates of HIV-related stigma among adults living with HIV: a cross-sectional study from coastal Kenya
Source: PubMed Central journal article supplement (PMC8867337; doi:10.1136/bmjopen-2021-050709), 2022-02-22
Supplement: bmjopen-2021-050709.draft_revisions.pdf [file bmjopen-2021-050709.draft_revisions.pdf]

# BMJ Open

BMJ Open is committed to open peer review. As part of this commitment we make the peer review history of every article we publish publicly available.

When an article is published we post the peer reviewers' comments and the authors' responses online. We also post the versions of the paper that were used during peer review. These are the versions that the peer review comments apply to.

The versions of the paper that follow are the versions that were submitted during the peer review process. They are not the versions of record or the final published versions. They should not be cited or distributed as the published version of this manuscript.

BMJ Open is an open access journal and the full, final, typeset and author-corrected version of record of the manuscript is available on our site with no access controls, subscription charges or pay-per-view fees (<http://bmjopen.bmj.com>).

If you have any questions on BMJ Open's open peer review process please email [info.bmjopen@bmj.com](mailto:info.bmjopen@bmj.com)

# BMJ Open

## HIV-Related Stigma: Measurement Characteristics and Correlates among Adults Living with HIV at the Kenyan Coast

|                               |                                                                                                                                                                                                                                                                                                                                                                                                                                                                                                                                                                                                                                                                                                                                                                                                                                                                                                                                                                                                                                                   |
|-------------------------------|---------------------------------------------------------------------------------------------------------------------------------------------------------------------------------------------------------------------------------------------------------------------------------------------------------------------------------------------------------------------------------------------------------------------------------------------------------------------------------------------------------------------------------------------------------------------------------------------------------------------------------------------------------------------------------------------------------------------------------------------------------------------------------------------------------------------------------------------------------------------------------------------------------------------------------------------------------------------------------------------------------------------------------------------------|
| Journal:                      | <i>BMJ Open</i>                                                                                                                                                                                                                                                                                                                                                                                                                                                                                                                                                                                                                                                                                                                                                                                                                                                                                                                                                                                                                                   |
| Manuscript ID                 | bmjopen-2021-050709                                                                                                                                                                                                                                                                                                                                                                                                                                                                                                                                                                                                                                                                                                                                                                                                                                                                                                                                                                                                                               |
| Article Type:                 | Original research                                                                                                                                                                                                                                                                                                                                                                                                                                                                                                                                                                                                                                                                                                                                                                                                                                                                                                                                                                                                                                 |
| Date Submitted by the Author: | 02-Mar-2021                                                                                                                                                                                                                                                                                                                                                                                                                                                                                                                                                                                                                                                                                                                                                                                                                                                                                                                                                                                                                                       |
| Complete List of Authors:     | Wanjala, Stanley; Pwani University School of Humanities and Social Sciences, Social Sciences; Ghent University Faculty of Medicine and Health Sciences, Public Health and Primary Care<br>Nyongesa, Moses; Centre for Geographic Medicine Research Coast, Clinical Neurosciences; Vrije Universiteit Amsterdam, Clinical, Neuro- and Developmental Psychology, Amsterdam Public Health Research Institute<br>Mwangi, Paul; Centre for Geographic Medicine Research Coast, Clinical Neurosciences<br>Mutua, Agnes M.; Centre for Geographic Medicine Research Coast, Clinical Neurosciences<br>Luchters, Stanley; Ghent University Faculty of Medicine and Health Sciences, Public Health and Primary Care; Aga Khan University - Kenya, Population Health<br>Newton, Charles; Centre for Geographic Medicine Research Coast, Clinical Neurosciences; Oxford University, Psychiatry<br>Abubakar, Amina A.; Centre for Geographic Medicine Research Coast, Clinical Neurosciences; The Aga Khan University - Kenya, Institute for Human Development |
| Keywords:                     | HIV & AIDS < INFECTIOUS DISEASES, Epidemiology < INFECTIOUS DISEASES, PUBLIC HEALTH                                                                                                                                                                                                                                                                                                                                                                                                                                                                                                                                                                                                                                                                                                                                                                                                                                                                                                                                                               |
|                               |                                                                                                                                                                                                                                                                                                                                                                                                                                                                                                                                                                                                                                                                                                                                                                                                                                                                                                                                                                                                                                                   |

SCHOLARONE™  
Manuscripts

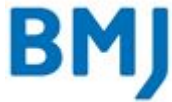

I, the Submitting Author has the right to grant and does grant on behalf of all authors of the Work (as defined in the below author licence), an exclusive licence and/or a non-exclusive licence for contributions from authors who are: i) UK Crown employees; ii) where BMJ has agreed a CC-BY licence shall apply, and/or iii) in accordance with the terms applicable for US Federal Government officers or employees acting as part of their official duties; on a worldwide, perpetual, irrevocable, royalty-free basis to BMJ Publishing Group Ltd ("BMJ") its licensees and where the relevant Journal is co-owned by BMJ to the co-owners of the Journal, to publish the Work in this journal and any other BMJ products and to exploit all rights, as set out in our [licence](#).

The Submitting Author accepts and understands that any supply made under these terms is made by BMJ to the Submitting Author unless you are acting as an employee on behalf of your employer or a postgraduate student of an affiliated institution which is paying any applicable article publishing charge ("APC") for Open Access articles. Where the Submitting Author wishes to make the Work available on an Open Access basis (and intends to pay the relevant APC), the terms of reuse of such Open Access shall be governed by a Creative Commons licence – details of these licences and which [Creative Commons](#) licence will apply to this Work are set out in our licence referred to above.

Other than as permitted in any relevant BMJ Author's Self Archiving Policies, I confirm this Work has not been accepted for publication elsewhere, is not being considered for publication elsewhere and does not duplicate material already published. I confirm all authors consent to publication of this Work and authorise the granting of this licence.

# HIV-Related Stigma: Measurement Characteristics and Correlates among Adults

## Living with HIV at the Kenyan Coast

Stanley W. Wanjala<sup>1,2\*</sup>, Moses K. Nyongesa<sup>3,4</sup>, Paul Mwangi<sup>3</sup>, Agnes M. Mutua<sup>3</sup>, Stanley Luchters<sup>2,5,6,7</sup>, Charles R.J.C. Newton<sup>3,8,9</sup>, Amina A Abubakar<sup>3,8,9,10</sup>

<sup>1</sup>Department of Social Sciences, Pwani University, Kilifi, Kenya

<sup>2</sup>Department of Public Health and Primary Care, Ghent University, Ghent, Belgium

<sup>3</sup>Neuroassessment Group, KEMRI/Wellcome Trust Research Programme, Centre for Geographic Medicine Research (Coast), Kilifi, Kenya.

<sup>4</sup>Department of Clinical, Neuro- & Developmental Psychology, Vrije Universiteit Amsterdam, Amsterdam, Netherlands

<sup>5</sup>Burnet Institute, Melbourne, Australia

<sup>6</sup>Department of Epidemiology and Preventive Medicine, Monash University, Melbourne, Australia

<sup>7</sup>Department of Population Health, Aga Khan University, Nairobi, Kenya

<sup>8</sup>Department of Public Health, Pwani University, Kilifi, Kenya

<sup>9</sup>Department of Psychiatry, University of Oxford, Oxford, UK

<sup>10</sup>Institute for Human Development, Aga Khan University, Nairobi, Kenya

**Address of the corresponding author:** Stanley W. Wanjala, Department of Social Sciences Pwani University, Box 195-80108, Kilifi, Kenya. Email: s.wanjala@pu.ac.ke

**Target journal:** BMJ Open

**Word count:** 4695

**Abstract** (300 words)

**Objective** We studied the psychometric properties of the 12-item short version of the Berger HIV stigma scale and assessed the correlates of HIV-related stigma among adults living with HIV on the Kenyan coast.

**Design** Cross-sectional study.

**Setting** Comprehensive Care and Research Centre in the Kilifi County Hospital.

**Participants** Adults living with HIV and on combination antiretroviral therapy were recruited and interviewed between February and April 2018 (n=450).

**Main outcome measures** HIV related stigma

**Results** 450 participants with a median age of 43 years (IQR = 36-50) took part in the study. Of these, 356 (79.1%) were female. Scale reliability and validity were high (alpha=0.80, test-retest reliability intraclass correlation coefficient =0.92). Using confirmatory factor analysis, we observed that the 12-item short version of the HIV stigma scale had a good fit for its hypothesised model (Comparative Fit Index =0.966, Tucker Lewis Index = 0.955, Root Mean Square Error of Approximation = 0.044). Multi-group confirmatory factor analysis indicated measurement invariance across gender and age groups as  $\Delta CFI$  was  $\leq 0.01$ . Multivariate linear regression established that being female ( $\beta=2.001$ , 95%CI: 0.21, 3.80,  $p= 0.029$ ), HIV status non-disclosure ( $\beta=4.237$ , 95%CI: 1.27, 7.20,  $p= 0.005$ ) and co-occurrence of depressive and anxiety symptoms ( $\beta=6.670$ , 95%CI: 3.40, 9.94,  $p<0.001$ ) were significant predictors of perceived HIV- related stigma and that these variables accounted for 10.2% of the explained variability in HIV-related stigma among adults living with HIV from Kilifi.

**Conclusions** Our results indicate that the 12-item short version of the HIV stigma scale is a valid and reliable measure of HIV stigma in Kenya. Furthermore, our study indicates that interventions aimed at reducing stigma need to take into account gender to address the specific needs of women, people who have not disclosed their HIV status, and those exhibiting symptoms of depression and anxiety, thereby improving their quality of life.

**Keywords:** Adults, Stigma, Predictors, HIV/AIDS, antiretroviral therapy, Psychometrics, Kenya

## Article Summary

### Strengths and limitations of this study

- This is the first study to report the 12-item HIV stigma scale's measurement characteristics in the sub-Saharan African context.
- We report on the correlates of HIV stigma based on a culturally adapted measurement tool with good psychometric properties.
- We cannot generalise our findings to all adults living with HIV in Kenya as data were collected from one geographical setting and excluded adults older than 60 years.
- We cannot conclude how individuals experience stigma over time because of the study design limitation.

## Introduction

HIV/AIDS remains a considerable public health concern globally, with sub-Saharan Africa (SSA) bearing the most HIV-related disease burden.<sup>1</sup> Despite SSA making up about 11% of the earth's population, it is the world's epicentre of HIV/AIDS. By the close of 2019, an estimated 38 million people were living with HIV globally, with an estimated 68% living in SSA, accounting for two-thirds of all HIV infected individuals.<sup>1</sup> Estimates show that between 80% to 90% of the people living with HIV/AIDS (PLWHA) in Kenya are adults.<sup>2</sup> Between 2010 and mid-2020, there has been an upsurge in the number of people accessing antiretroviral therapy (7.8- 26 million). Further, between 2010 and 2019, new HIV infections declined by an estimated 16% from 2.1 Million/year to 1.7 million/year, and AIDS-related deaths dropped from 1.1 million to around 690,000 per year.<sup>1</sup>

Erving Goffman<sup>3</sup> defined stigma as a process through which individuals are 'disqualified from full social acceptance' due to an undesirable 'mark' or 'label.' This label can either be a physical, health, or behavioural attribute that is regarded as 'deeply discrediting.'<sup>3</sup> In this study, the label is HIV seropositive status. Additionally, stigma, defined as a 'mark,' sets a person apart from others and links the person to undesirable characteristics such as stereotypes.<sup>4</sup> HIV-related stigma among PLWHA is prevalent throughout SSA.<sup>5</sup> HIV-related stigma has been identified as a severe obstacle in the way of effective responses to HIV.<sup>6</sup>

Although efforts have been scaled up to raise awareness and increase public knowledge about HIV since the epidemic started decades ago, social stigma is still associated with the disease.<sup>7</sup> Research has demonstrated that stigma keeps people from adopting HIV preventive behaviours and accessing needed care and treatment<sup>8</sup>, negatively impacting their health and well-being. Among HIV-infected women, the decision to disclose their HIV seropositive status is likely affected by perceived stigma.<sup>9</sup>

From previous research, HIV stigma experienced by PLWHA can either be enacted, anticipated, or internalised.<sup>10</sup> Enacted stigma includes an individual's experiences, prejudice, and/or discrimination from others because of one's HIV status. Anticipated stigma includes an individual's expectation of experiencing enacted stigma, while internalised stigma refers to the extent to which PLWHA have adopted negative feelings and beliefs about PLWHA.<sup>11</sup>

A variety of instruments designed to measure HIV-related stigma have been published.<sup>12-20</sup> Berger's 40-item HIV stigma scale (HSS-40) is the most commonly used instrument and one of the few instruments covering all stigma mechanisms affecting PLWHA.<sup>11</sup> It takes up to 25

minutes to complete the HSS-40<sup>21</sup>, which may limit its application, especially in extensive surveys. Though there exist shortened versions covering 25<sup>21</sup> and 32<sup>22</sup> items of the HIV stigma scale, the 12-item HIV stigma scale (HSS-12)<sup>13</sup> version of the Berger HIV stigma scale was examined in the present study as it facilitates the inclusion of HIV stigma in more extensive surveys. Furthermore, it has comparable psychometric properties to the full-length scale.<sup>13</sup> While evidence from other parts of the world<sup>13</sup> indicates that the HSS-12 is psychometrically sound, we are unaware of any study that has reported this scales' psychometric properties in the SSA context.

Empirical evidence indicates that sociodemographic characteristics such as age,<sup>23 24</sup> gender,<sup>24-26</sup> employment,<sup>27</sup> educational attainment,<sup>28-30</sup> and marital status,<sup>31</sup> are significantly correlated with HIV related stigma. However, the directionality is inconsistent. An explanation for the different findings regarding correlates and predictors of HIV related stigma might be due to the diverse research strategies applied and the sample composition. Research shows that stigma and disclosure of HIV status are interrelated phenomena for people living with HIV/AIDS.<sup>32</sup> Furthermore, persons who have not disclosed their HIV status exhibit higher levels of perceived HIV-related stigma and greater levels of concern about HIV disclosure.<sup>33</sup>

Despite the abundance of published reports on HIV related stigma and its predictors amongst specific sub-groups of the adult population, there is a paucity of research findings focusing on predictors of HIV related stigma across the entire adult population. Further, no study in the SSA context has tested for the validity and reliability of the HSS-12. This study aims to determine the correlates of HIV-related stigma among adults living with HIV from Kilifi, Coastal Kenya. Specifically, the study aims to: i) examine the psychometric properties of the 12-item Berger Stigma Scale; and ii) establish the correlates of stigma among adults living with HIV in Kilifi.

## Methods

### Study setting

This cross-sectional study was conducted at the Centre for Geographic Medicine Research-Coast, Kenya Medical Research Institute-Wellcome Trust Research Programme (KEMRI/WTRP). It was based at the Comprehensive Care and Research Centre (CCRC) in the Kilifi County Hospital (KCH). The majority of Kilifi County residents are poor (71.4% live below the poverty line), lack formal education, and earn a living mainly through subsistence



1  
2  
3 farming or fishing.<sup>34-37</sup> HIV prevalence in adults is estimated to be at 4.5%.<sup>38</sup> The CCRC offers  
4 clinical services such as management of opportunistic infections, HIV testing and counselling,  
5 family planning, nutritional counselling, cervical cancer screening, and serves as a research  
6 facility. About 60 patients are seen daily. By 2020, the clinic has enrolled over 9,000 patients  
7 of all ages.  
8  
9

### 10 11 12 **Study participants**

13  
14 This data is part of a larger project focusing on diverse outcomes in adults living with HIV,  
15 including mental health and health-related quality of life. A cross-sectional survey of 450 study  
16 participants among patients attending an HIV care and treatment clinic at Kilifi County  
17 Hospital was conducted between February and April 2018 (Figure 1). The participation criteria  
18 were age (18-60 years old) with confirmed HIV positive status, on combination antiretroviral  
19 therapy, and informed consent to participate. Participants with an acute medical illness or  
20 cognitive difficulties at the time of enrolment/administration of questionnaire or could not  
21 understand and/or communicate in the national language (Kiswahili), which was used during  
22 the administration of all study instruments, were excluded. A research team member introduced  
23 the study to eligible participants when they visited the clinic for scheduled appointments. Those  
24 who consented to take part responded to the instruments at the clinic.  
25  
26  
27  
28  
29  
30  
31  
32  
33  
34  
35

### 36 **Data Collection Procedures**

37  
38 Study data were collected and managed using REDCap electronic data capture tools hosted at  
39 KEMRI Wellcome Trust Programme. Data collection instruments were interviewer-  
40 administered via android tablets, in the same order, and under the same administration  
41 environment. Research assistants underwent a 4-day training in research ethics and proper  
42 interviewing techniques (with role-plays) and were familiarised with the tablet-based  
43 questionnaires. The questionnaire administration took place in a quiet and private room within  
44 the CCRC in KCH, and the interview session lasted between 30 to 45 minutes.  
45  
46  
47  
48  
49  
50  
51

### 52 **Measures**

53  
54 **HIV-related stigma:** The short version (HSS-12) of the Berger HIV stigma scale<sup>13</sup> was used  
55 to assess patient-perceived HIV-related stigma under four dimensions: i) *personalised stigma*;  
56 ii) *disclosure concerns*; iii) *negative self-image*; and iv) *concerns with public attitudes*, each  
57 comprising a sub-scale of the instrument. *Personalised stigma* has been suggested to represent  
58  
59  
60

1  
2  
3 the enacted stigma mechanism, *disclosure concerns*, and *concerns with public attitudes*  
4 dimensions have been proposed to represent anticipated stigma mechanism, and *negative self-*  
5 *image* has been proposed to represent internalised stigma mechanism.<sup>11</sup> Items on this scale are  
6 rated from 1-4, with (1) being “strongly disagree” and (4) “strongly agree.” The possible score  
7 for each item ranges from 1 to 4 (3–12 for sub-scale), and a total score ranges between 12 and  
8 48 and is derived from the summation of item scores. Higher scores designate a greater level  
9 of perceived HIV-related stigma.

10  
11  
12  
13  
14  
15  
16 **Patient Health Questionnaire version 9 (PHQ-9)**<sup>39</sup> was administered as a measure of  
17 depressive symptoms. The PHQ-9 is a nine-item scale rated on a Likert-type scale ranging  
18 from 0 “not at all” to 3 “nearly every day.” Item scores are summated to derive a total score  
19 ranging from 0 to 27. It has previously been found to have good internal consistency (Cronbach  
20 alpha 0.78) and acceptable test-retest reliability (intraclass correlation coefficient [ICC]=0.59)  
21 when used among adults living with HIV infection in Kenya<sup>40</sup>.

22  
23  
24  
25  
26  
27 **Generalised Anxiety Disorder (GAD-7)**<sup>41</sup> was administered as a clinical measure for  
28 assessing generalised anxiety disorder based on DSM-IV criteria. The GAD-7 is a seven-item  
29 self-report instrument rated on a Likert-type scale ranging from 0 “not at all” to 3 “nearly every  
30 day.” The scale score ranges from 0 to 21. There is reported evidence in support of the  
31 reliability and validity of this scale in Kenya.<sup>42</sup> Scores from PHQ-9 and GAD-7 were combined  
32 to generate a variable called CMD comorbidity, indicating the co-occurrence of depressive and  
33 anxiety symptoms.

34  
35  
36  
37  
38  
39  
40 **Sociodemographic and asset index items:** A sociodemographic questionnaire was used to  
41 collect information on the participants’ age, gender, relationship status, educational level,  
42 employment status, and whom they currently shared a residence. Furthermore, an asset index  
43 previously used in this setting<sup>43</sup> was used to collect information about participants’ socio-  
44 economic status (SES) based on disposable assets owned. Participants were asked for  
45 ownership of disposable items such as radio, television, refrigerator, gas, bicycle, motorcycle,  
46 and car. The final SES score had seven (7) items. A total asset score is calculated, and  
47 higher scores indicate a better SES. An asset index to estimate family wealth has been  
48 recommended as an alternative approach to estimating SES in settings where reliable data on  
49 family income may not be available.<sup>44</sup>

50  
51  
52  
53  
54  
55  
56  
57 **Clinical information:** Participants’ data were extracted from the clinic’s medical record  
58 database and filled into a clinical record form. This information included participants’ dates of  
59

1  
2  
3 HIV-diagnosis, combination antiretroviral therapy initiation, most current combination  
4 antiretroviral therapy regimen, cluster of differentiation 4 (CD4) cell count, viral load, recent  
5 height and weight (for Body Mass Index (BMI) calculation), and data on World Health  
6 Organization (WHO) clinical staging. Participants' clinical information was retrieved from  
7 their clinical records after consent was granted. Patient-unique clinic numbers were used to  
8 access participants' medical records.  
9

### 14 **Instrument translation and cross-cultural adaptation**

16 The English version of the HSS-12 was forward translated by two independent bilingual  
17 translators to Kiswahili and back-translated into English by two independent back translators  
18 (oblivious of the original version). A group of Kenyan HIV researchers bilingual and fluent in  
19 both Kiswahili and English and the translators had a harmonisation meeting to review the  
20 content, conceptual, semantic, and idiomatic equivalence of the questionnaires to ensure the  
21 cultural relevance of the HSS-12. The final version was obtained after the incorporation of  
22 changes emerging from pretesting.  
23  
24  
25  
26  
27  
28  
29

### 30 **Patient and public involvement**

31 Patients were not involved in the design and conduct of this study.  
32  
33  
34

### 35 **Statistical analyses**

#### 38 **Factor structure and measurement invariance across age-groups and gender**

39 First, Confirmatory Factor Analysis (CFA) was used to examine the HIV-stigma scale's factor  
40 structure. A CFA model representing the Swahili version of the HSS-12 was set up and  
41 analysed with weighted least square mean and variance adjusted (WLSMV) using the lavaan<sup>45</sup>  
42 package in R statistical software<sup>46</sup> on all the 450 observations. The Goodness of fit was  
43 assessed using  $\chi^2$  test, Comparative Fit Index (CFI), Tucker Lewis Index (TLI), and root mean  
44 square error of approximation (RMSEA). The data was expected to have a good fit to the model  
45 if the  $\chi^2$  test was non-significant, CFI and TLI values were greater than 0.90, and RMSEA score  
46 was lower than 0.05.<sup>47</sup>  
47  
48  
49  
50  
51  
52  
53

54 Secondly, after defining the model, Multi-Group Confirmatory Factor Analysis (MGCFAs)<sup>48</sup>  
55 was used to test for measurement invariance of the HSS-12 for gender and age groups. Change  
56 in CFI ( $\Delta$ CFI) has been suggested as a robust statistic for testing between-group invariance of  
57  
58  
59  
60

1  
2  
3 CFA models. Additionally, it has been recommended that invariance can be assumed when  
4  $\Delta$ CFI is  $\leq 0.01$  in absolute values.<sup>49</sup>  
5  
6

### 7 **Internal construct validity and convergent validity**

8  
9 Means and standard deviations were used to evaluate the distribution of scores within the  
10 subscale and among the items. Itemised means and standard deviations were expected to be  
11 almost the same within the subscale, justifying item scores' aggregation into subscale scores.<sup>50</sup>  
12 The item-total correlation was used to evaluate internal construct validity. Each items'  
13 corrected item-total correlation coefficients were calculated and expected to exceed 0.4 and  
14 vary in range. Convergent validity was assessed using the Pearson correlation coefficient  
15 between HSS-12, PHQ-9, and GAD-7 scores. Correlation coefficients were interpreted as small  
16 (0.10–0.29), moderate (0.30–0.49), and large (0.49 and above).<sup>51</sup>  
17  
18  
19  
20  
21  
22

### 23 **Reliability**

24  
25 Cronbach's alpha ( $\alpha$ ) was used to examine each subscale's internal consistency and overall  
26 scores of the Swahili version of the HSS-12. Cronbach's alpha was considered acceptable if  
27 greater than ( $>0.7$ ).<sup>52</sup> The intra-class correlation coefficient (ICC) was used to examine test-  
28 retest of the Swahili version of the HSS-12 by correlating scores taken at two different time  
29 points (2 weeks apart) using the same measure administered to the same participant. ICC of  
30 0.60 was considered marginal, 0.70 acceptable, and anything over 0.80 considered high.<sup>53</sup>  
31  
32  
33  
34  
35

### 36 **Sample characteristics and correlates**

37  
38 Frequencies and means (with percentages and standard deviations) were used to describe  
39 sample characteristics. Univariate and multivariable linear regression were used to assess  
40 factors associated with both stigma subscales and the overall stigma scale. In the regression  
41 model, stigma scores were expressed as a continuous measure. Independent variables included  
42 age, gender, marital status, education level, employment status, socioeconomic status (SES),  
43 body mass index (BMI), viral load, WHO clinical stages, months since HIV diagnosis, months  
44 since cART initiation, HIV status disclosure, self-reported opportunistic infections, and the co-  
45 occurrence of depressive and anxiety symptoms. Our review of the literature informed factors  
46 included in the model. All variables with  $p < 0.20$  were included in the multivariable regression  
47 model apart from viral load because participants had missing values ( $n=145$ ). The final  
48 multivariable models were generated using a backward stepwise approach by eliminating all  
49 variables independently with  $p > 0.05$ . Assumptions of linear regression testing were visually  
50 inspected through histograms (linearity), normal probability plots (normality), and plots of  
51  
52  
53  
54  
55  
56  
57  
58  
59  
60

1  
2  
3 residual versus predicted values (homoscedasticity). Multicollinearity was assessed using the  
4 variance inflation factor (VIF). There were no multicollinearity problems. Modelling was  
5 undertaken five times in total: once to predict overall stigma and once to predict each of the  
6 four subscales. R (version 3.6.3) statistical software package was used to explore the construct  
7 validity of the HSS-12. All other analyses were run using (Stata version 15.0) statistical  
8 software package.  
9  
10  
11  
12  
13

## 14 Results

### 15 Sample Characteristics

16  
17 The 450 participants had a median age of 43 years (IQR = 36-50), ranging from 18 to 60 years.  
18 The vast majority of the sample were female (79.1%), had attained basic primary level  
19 education (53.1%), lived with a family member (82.4%), and were unemployed (59.8%). Less  
20 than half of the study participants (43.8%) were either separated, divorced, or widowed. The  
21 mean BMI was within the normal range (mean [SD] = 22.4 [4.8]). Most study participants had  
22 disclosed their HIV status to others (94.0%). The median time since HIV diagnosis was 8.8  
23 years (IQR = 4.67-11.50), ranging from 0 to 18 years. 417(93.7%) were in stage 1 of the WHO  
24 clinical staging and 425 (95.3%) on the first-line cART regimen (Table 1). The median time  
25 elapsed since cART initiation was 6.7 years (IQR = 3.67-10.00). At the time of the interview,  
26 less than a fifth (18.4%) of the study participants had an opportunistic infection.  
27  
28  
29  
30  
31  
32  
33  
34  
35  
36

37 Perceived overall stigma scores ranged from 12 to 48, with a median score of 28 (IQR = 23-  
38 33). Using PHQ-9 and GAD-7 cut-off score of  $\geq 10$ , which have been shown to maximise  
39 specificity and sensitivity for depression<sup>54</sup> and general anxiety disorder<sup>41</sup> screening, the overall  
40 prevalence of depressive and anxiety was 13.8% and 5.3%, respectively, among enrolled  
41 participants. The co-occurrence of depressive and anxiety symptoms was present in 4.7% of  
42 the study participants.  
43  
44  
45  
46  
47

### 48 Factor structure and measurement invariance across age groups and gender

49  
50 Supplementary **Error! Reference source not found.** presents CFA results with standardised  
51 correlation coefficients. Our hypothesised model that the overall stigma scale comprises four  
52 sub-scales correlated was confirmed given the observed fit indexes. The  $\chi^2$  test was statistically  
53 significant ( $\chi^2 = 91.982$ ,  $df = 50$ ,  $p = 0.000$ ) but alternate fit measures indicated acceptable fit;  
54 RMSEA: 0.044; CFI:0.966 and TLI: 0.955. These results generally indicate that the data had a  
55 good fit to the model and that we can confidently use both total and sub-scale scores in this  
56  
57  
58  
59  
60

1  
2  
3 population. Measurement invariance across age groups and gender was entirely supported  
4 because  $\Delta$ CFIs are lower than 0.01 in all models suggesting that measurement invariance can  
5 be assumed.  
6  
7

### 8 9 **Internal construct validity and convergent validity**

10  
11 The factor loading of all items on the hypothesised scale was good except for item 6 (0.21)  
12 under the disclosure concern subscale. Convergent validity of the HSS-12 was demonstrated  
13 by the small to moderate correlations between HSS-12 and the correlation with the following  
14 relevant measures: GAD-7 ( $r = 0.368$ ,  $p < 0.001$ ) and PHQ-9 ( $r = 0.328$ ,  $p < 0.001$ ) Table 2.  
15  
16  
17

### 18 19 **Reliability: Internal consistency and test-retest**

20  
21 Cronbach's  $\alpha$  for the subscales and overall scale were all  $> 0.7$  (see Table 2) except for the  
22 disclosure concern sub-scale, which was 0.53 (95%CI: 0.46, 0.60). The test-retest reliability of  
23 the short 12-item version of the HIV stigma scale was excellent, 0.92 (95%CI: 0.87, 0.95).  
24 Additionally, Table 2 presents descriptive statistics for the stigma scale on the item level and  
25 subscale level. Corrected item-total correlation coefficients were  $> 0.4$  for all the items apart  
26 from one item (0.21) in the disclosure concerns subscale. There is a variation in the range of  
27 0.46-0.88, indicating that the intended stigma concepts' broadness had been captured.  
28  
29  
30  
31  
32

### 33 34 **Correlates of perceived HIV related stigma**

35  
36 In the univariate model, it was found that being female, being separated, divorced or widowed,  
37 having primary or no level of education, being self-employed or unemployed, having a low  
38 asset index score, having a viral load of  $> 1000$  copies/ml, decreased duration since HIV  
39 diagnosis, decreased duration since cART initiation, HIV status non-disclosure, having any  
40 current opportunistic infection and co-occurrence of depression and anxiety symptoms were  
41 significantly associated with overall HIV stigma scores.  
42  
43  
44  
45

46  
47 *Personalised stigma* was significantly associated with being female, being single or either  
48 separated, divorced or widowed, self-employed or unemployed, having a low asset index score,  
49 having a viral load of  $> 1000$  copies/ml, having any current opportunistic infection, and the co-  
50 occurrence of depressive and anxiety symptoms. *Disclosure concern* was significantly  
51 associated with either being separated, divorced or widowed, having no level of education,  
52 having a low asset index score, less time elapsed since HIV diagnosis, less time elapsed since  
53 cART initiation, and HIV status non-disclosure. *Concern with public attitudes* was  
54 significantly associated with being female, having primary or no level of education, decreased  
55  
56  
57  
58  
59  
60



1  
2  
3 duration since cART initiation, and the co-occurrence of depressive and anxiety symptoms.  
4 *Negative self-image* was significantly associated with either being separated, widowed or  
5 divorced, having no level of education, being self-employed or unemployed, having a viral  
6 load of >1000 copies/ml, decreased duration since HIV diagnosis, decreased duration since  
7 cART initiation, having any current opportunistic infection and the co-occurrence of depressive  
8 and anxiety symptoms (Table 3).  
9

10  
11  
12  
13  
14 When a multiple linear regression model was run, it was found that being female ( $\beta=2.001$ ,  
15  $95\%CI: 0.21, 3.80$ ,  $p=0.029$ ), HIV status disclosure ( $\beta=4.237$ ,  $95\%CI: 1.27, 7.20$ ,  $p=0.005$ )  
16 and co-occurrence of depressive and anxiety symptoms ( $\beta=6.670$ ,  $95\%CI: 3.40, 9.94$ ,  $p<0.001$ )  
17 were significant predictors of perceived HIV stigma. Having no education was borderline  
18 statistically significant ( $\beta=3.318$ ,  $95\%CI: -.01, 6.65$ ,  $p=0.051$ ). Regression results indicated  
19 that the model explained 10.2% of the variance and that the model was a significant predictor  
20 of perceived HIV stigma  $F(6, 395) = 7.46$ ,  $p<0.001$ .  
21  
22

23  
24  
25  
26  
27 Concerning the four subscales, we found that *personalised stigma* was positively correlated  
28 with being female and the co-occurrence of depressive and anxiety symptoms. *Disclosure*  
29 *concern* was inversely correlated with duration since HIV diagnosis and positively correlated  
30 with having no level of education and HIV status non-disclosure. *Concerns with public*  
31 *attitudes* were positively correlated with being female. *Negative self-image* was positively  
32 correlated with having no level of education and the co-occurrence of depressive and anxiety  
33 symptoms (Table 4).  
34  
35  
36  
37  
38  
39

## 40 Discussion

41  
42 This cross-sectional analysis of data from adults living with HIV observed that the HSS-12  
43 presents excellent psychometric properties. Additionally, we observed that stigma was  
44 associated with both physical and mental well-being. According to our study, correlates of  
45 HIV related stigma include being female, HIV status non-disclosure, and the co-occurrence of  
46 depressive and anxiety symptoms. Furthermore, although having no education was borderline  
47 statistically significant, we would still suggest focusing on people with no education as a risk  
48 group from a programmatic point of view.  
49  
50  
51  
52  
53  
54  
55  
56  
57  
58  
59  
60

## Factor structure, measurement invariance, validity and reliability of the short 12-item Swahili version of the HIV Stigma Scale

The study examined the stigma scale's psychometric properties to assess its usefulness and describe the correlates of HIV-related stigma among adults living with HIV in Kilifi. Reliability and validity were acceptable, and confirmatory factor analysis supported the four-factor solution measuring the four dimensions of HIV stigma. Cronbach's alpha for the HSS-12 among the Kenyan population is similar to the Swedish population in which the scale was developed.<sup>13</sup> Although Cronbach's alpha for the adapted HSS-12 sub-scales was slightly lower (0.53-0.84) than the initial version of HSS-12 (0.80-0.88), its' alpha for the total scale was 0.80 suggesting good internal consistency.

Measurement invariance of the Swahili HSS-12 was evaluated and confirmed across main interest groups: gender and age. Our results indicated that the measurement model of the Swahili HSS-12 as a patient-reported outcome to measure perceived HIV stigma among adults is comparable across age groups and gender (Table 5).

Test-retest reliability, an indicator of scale stability over time, was of acceptable levels. The original HSS-40 has been used in diverse settings<sup>12 55</sup> among adults 18 years and above reporting a test re-test reliability between (ICC=0.89-0.92). To the best of our knowledge, no study has reported the test re-test reliability of the HSS-12.

We examined the construct validity of the scale using CFA since its hypothesised structure has been published. Our results indicated that the hypothesised model fit the data well and was almost similar to what was reported by a study conducted in Sweden<sup>13</sup>. These results indicate that one can use both the total scores and the subscale scores and interpret the results in confidence, knowing that the items fit well together. HSS-12 evidenced convergent validity by being correlated with PHQ-9, a measure of depression, and GAD-7, a measure of anxiety in conventional ways.

The HSS-12 was reliable and valid for detecting stigma among adults living with HIV at the Kenyan Coast. Consequently, HSS-12 can be practically used as a brief screening tool for stigma-related problems both for research and clinical purposes. Future research could examine its predictive validity and evaluate its sensitivity to changes. This information would be crucial in determining its usefulness as an evaluation tool for programmes and interventions.



## Correlates of Stigma

Being female was positively associated with increased perceived HIV-related stigma scores, *personalised stigma*, and *concern with public attitudes*. This finding agrees with previous studies from SSA<sup>56</sup> and outside<sup>57,27</sup> that reported a positive association between female gender and perceived HIV related stigma. Research shows that females are more likely to suffer from stigma in patriarchal societies like ours than males.<sup>58 59</sup> Research has established that the African society is less tolerant of HIV infected females than it is of HIV infected men.<sup>60 61</sup> Due to women's subordinate status in society, they are often stigmatised as vectors of transmission.<sup>62</sup> Furthermore, the common belief that HIV is caused by indecent sexual behaviour has worse societal consequences for women who are expected to be monogamous, unlike men in most African societies.<sup>60</sup> Women are often blamed counterfactually to be responsible for HIV transmission.<sup>60</sup> Similar processes can be assumed to be at work in the Kenyan coastal region.

HIV status disclosure was positively associated with overall HIV related stigma scores and *disclosure concerns* with persons who had not disclosed their HIV status reporting greater levels of concern about HIV disclosure concerns. Anakwa and colleagues found that PLWHA with higher levels of perceived HIV-related stigma reported greater levels of HIV disclosure concerns, therefore, less likely to disclose their status.<sup>33</sup> From our study, only 6% had not disclosed their status to anyone. HIV status non-disclosure might be a protective behaviour for a PLWHA to conceal their status, evade adverse reactions towards themselves, weigh other people's reactions, and as a sign of concern about the implication of their disclosure on their disclosure targets.<sup>63 64</sup> Further, disclosure is not only about how or whom to disclose to, but it also entails finding good opportunities to disclose or devise means of keeping ones' status and/or medication a secret to enhance access and adherence to their treatment regimen.

The co-occurrence of depressive and anxiety symptoms influenced overall HIV related stigma scores, *personalised stigma*, and *negative self-image*. This finding corroborates previous studies among PLWHA carried out within SSA<sup>29 65, 25</sup>, and outside<sup>66 67</sup>, which have invariably found a significant association between HIV-related stigma and depressive symptoms. Liu and colleagues<sup>68</sup> reported that the more stigma PLWHA perceived, the more anxiety they experienced. Similarly, we report that HIV related stigma is significantly associated with the co-occurrence of depressive and anxiety symptoms. Additionally, an individual's perception of themselves in light of their diagnosis appears to trigger depression.<sup>69</sup> Screening for

1  
2  
3 depression, anxiety, and HIV-related stigma might provide insights on interventions that may  
4 promote a positive attitude and positive self-image, thereby reducing depression, anxiety, and  
5 stigma, leading to their psychological and physical well-being. Given the cross-sectional nature  
6 of the study, we cannot claim causality. However, the association between co-occurrence of  
7 depressive and anxiety symptoms and stigma provides the impetus for: a) longitudinal studies  
8 to elucidate causal pathways; and b) targeted interventions to address both stigma and mental  
9 health to improve health outcomes of adults living with HIV.

10  
11  
12  
13  
14  
15  
16 Other factors influencing the four subscales were also established. Having no level of education  
17 was positively associated with higher reported *disclosure concerns* and *negative self-image*,  
18 corroborating findings of studies carried out in Nigeria<sup>70</sup> and the USA.<sup>71</sup> Lower levels of  
19 education may lead to less exposure, lack of or little knowledge about HIV infection and  
20 transmission. In contrast, higher levels of education might lead to higher levels of knowledge,  
21 providing exposure to new ways of thinking and new sources of information about the HIV  
22 pandemic resulting in the reduction of less supportive attitudes towards PLWHA.<sup>72 73</sup> Previous  
23 research has demonstrated that people with high levels of knowledge of the transmission routes  
24 for HIV consistently had more supportive attitudes towards those with HIV demonstrating the  
25 role that knowledge has in reducing the misconceptions that act to create fear and shape  
26 stigma.<sup>72</sup>

27  
28  
29  
30  
31  
32  
33  
34  
35  
36 Months since HIV diagnosis was inversely associated with *disclosure concerns*, with persons  
37 with a more recent diagnosis reporting greater levels of concern about HIV status disclosure.  
38 This is consistent with a study among people living with HIV/AIDS (PLWHA) in China<sup>74</sup> and  
39 among African Americans.<sup>71</sup> This finding suggests that living longer with HIV is associated  
40 with positive outcomes because PLWHA are likely to adjust over time to their HIV positive  
41 status, receive more information, develop greater insights and understanding of the disease and  
42 establish psychological mechanisms to better cope with HIV stigma leading to lower levels of  
43 perceived HIV stigma.

### 44 45 46 47 48 49 50 **Strengths and limitations of this study**

51  
52 We recognise several potential limitations in this study. First, the study was in a clinical setting  
53 where our study sample consisted of adults living with HIV on cART. Compared to untreated  
54 individuals living with HIV, it is likely that levels of HIV stigma would be lower in our sample  
55 because it has been shown that access to ART lowers stigma.<sup>75-77</sup> Secondly, this study is cross-  
56 sectional, and hence, causality for the observed significant associations cannot be inferred. We  
57  
58  
59  
60

1  
2  
3 can also not conclude how individuals may experience stigma over time because of the study  
4 design limitation. Finally, findings may not be generalisable to all adults living with HIV in  
5 Kenya as data were collected from one geographical setting and excluded adults older than 60  
6 years.  
7  
8  
9

### 10 11 **Conclusions and implications**

12  
13 From the study, the 12-item short version of the Berger HIV stigma scale<sup>13</sup> had good  
14 psychometric properties and can be recommended for research purposes. The current study  
15 suggests that women, those who have not disclosed, and those experiencing co-occurring  
16 symptoms of depressive and anxiety symptoms, experience a higher level of perceived HIV  
17 stigma in Coastal Kenya. This finding is useful in designing future interventions to improve  
18 the quality of life of people living with HIV/AIDS. We propose interventions need to take into  
19 account gender to address the specific needs of women, people who have not disclosed their  
20 HIV status, and those exhibiting symptoms of depression and anxiety, thereby improving their  
21 quality of life. Additionally, it would be prudent to design interventions that focus on people  
22 with no education as a risk group who would experience high levels of HIV perceived stigma  
23 from a programmatic perspective. All these interventions will help in bettering both the  
24 physical and mental well-being of HIV-infected adults.  
25  
26  
27  
28  
29  
30  
31  
32  
33

### 34 35 **Acknowledgements**

36  
37 We thank our participants for taking the time and effort to participate in this study and the  
38 Comprehensive Care and Research Centre (CCRC) staff in the Kilifi County Hospital HIV care  
39 and treatment clinic for their unrelenting support. We appreciate Patrick Katana Vidzo for  
40 helping with the entry of clinical data. The authors acknowledge the Kenya Medical Research  
41 Institute (KEMRI) Director for permission to publish this work.  
42  
43  
44  
45  
46

### 47 48 **Footnotes**

49  
50 *Author Contributions:* SWW, CN, and AA conceptualised the study. SWW, MKN and AA  
51 designed the study. PM formulated study questions for tablet administration and managed the  
52 data. SWW and MKN supervised data collection. SWW, MKN, and AM participated in data  
53 collection. SWW and MKN analysed the data. SWW, MKN, PM, AM, SL, CN and AA  
54 contributed to interpreting the data. SWW wrote the first draft of the manuscript. All authors  
55 reviewed subsequent versions of the manuscript and approved the final version for submission.  
56  
57  
58  
59  
60

1  
2  
3 The corresponding author affirms that all listed authors meet authorship criteria and that no  
4 other author meeting the criteria has been omitted.  
5  
6  
7  
8

9 *Funding:* This work was supported by funding from the Medical Research Council (Grant  
10 number MR/M025454/1) to AAA. This award is jointly funded by the UK Medical Research  
11 Council (MRC) and the UK Department for International Development (DFID) under the  
12 MRC/DFID concordant agreement and is also part of the EDCTP2 program supported by the  
13 European Union.  
14  
15  
16  
17

18  
19 *Disclaimer:* The funders had no role in the design, collection, analysis, interpretation and  
20 manuscript writing.  
21  
22  
23

24 *Competing interests:* The authors wish to declare no potential conflict of interest.  
25  
26  
27

28 *Ethical approval:* The local institutional review board, Scientific and Ethics Review Board  
29 (SERU; Ref KEMRI/SERU/CGMR-C/108/3594), granted ethical approval to recruit  
30 participants into the study. We obtained authorisation to work in the HIV care and treatment  
31 clinic from the Ministry of Health, County government of Kilifi (Ref HP/KCHS/VOL.VIX/65).  
32 Study participants provided written, informed consent to be part of the study.  
33  
34  
35  
36  
37

38 *Transparency:* The lead author (SWW) confirms that the manuscript is an honest, accurate,  
39 and sincere account of the research being reported; no important aspects of the research have  
40 been omitted; and that explanations for any discrepancies from the research as planned (and, if  
41 relevant, registered) have been provided.  
42  
43  
44  
45  
46

47 *Data sharing statement:* No additional data are available. Anyone interested in accessing the  
48 data reported in this article is free to write to the Data Governance Committee of the KEMRI  
49 Wellcome Trust Research Programme, review the application and advise as appropriate, and  
50 ensure that uses are compatible with the consent obtained from participants for data collection.  
51 Requests can be sent to the coordinator of the Data Governance Committee using the following  
52 email: [dgc@kemri-wellcome.org](mailto:dgc@kemri-wellcome.org).  
53  
54  
55  
56  
57  
58  
59  
60

## REFERENCES

1. UNAIDS. Global HIV & AIDS statistics — 2020 fact sheet [Available from: <https://www.unaids.org/en/resources/fact-sheet/files/3352/fact-sheet.html>].
2. NACC. Kenya AIDS Response Progress Report 2014: Progress towards Zero. Nairobi, Kenya: National AIDS Control Council of Kenya, 2014.
3. Goffman E. Stigma. Notes on the Management of Spoiled Identity. New York: Simon and Shuster: Inc, 1963.
4. Jones EE, Farina A, Hastorf AH, et al. Social stigma: the psychology of marked relationships. New York: W.H. Freeman 1984.
5. Maluccio JA, Wu F, Rokon RB, et al. Assessing the Impact of Food Assistance on Stigma Among People Living with HIV in Uganda Using the HIV/AIDS Stigma Instrument—PLWA (HASI-P). *AIDS and Behavior* 2017;21(3):766-82. doi: 10.1007/s10461-016-1476-9 [published Online First: 2016/07/04]
6. Dahlui M, Azahar N, Bulgiba A, et al. HIV/AIDS Related Stigma and Discrimination against PLWHA in Nigerian Population. *PLoS One* 2015;10(12):e0143749. doi: 10.1371/journal.pone.0143749 [published Online First: 2015/12/15]
7. Toth S, J AY, DePinto N. HIV stigma: perceptions from HIV-positive and HIV-negative patients in a community dental clinic. *J Dent Res Dent Clin Dent Prospects* 2016;10(4):263-69. doi: 10.15171/joddd.2016.042 [published Online First: 2017/01/18]
8. Nyblade L, Stangl A, Weiss E, et al. Combating HIV stigma in health care settings: what works? *J Int AIDS Soc* 2009;12:15. doi: 10.1186/1758-2652-12-15 [published Online First: 2009/08/08]
9. Clark HJ, Lindner G, Armistead L, et al. Stigma, disclosure, and psychological functioning among HIV-infected and non-infected African-American women. *Women & health* 2004;38(4):57-71.
10. Lindberg MH, Wettergren L, Wiklander M, et al. Psychometric evaluation of the HIV stigma scale in a Swedish context. *PLoS One* 2014;9(12):e114867. doi: 10.1371/journal.pone.0114867 [published Online First: 2014/12/19]
11. Earnshaw VA, Chaudoir SR. From conceptualizing to measuring HIV stigma: a review of HIV stigma mechanism measures. *AIDS Behav* 2009;13(6):1160-77. doi: 10.1007/s10461-009-9593-3 [published Online First: 2009/07/29]
12. Berger BE, Ferrans CE, Lashley FR. Measuring stigma in people with HIV: Psychometric assessment of the HIV stigma scale. *Research in nursing & health* 2001;24(6):518-29.
13. Reinius M, Wettergren L, Wiklander M, et al. Development of a 12-item short version of the HIV stigma scale. *Health and Quality of Life Outcomes* 2017;15(1):115. doi: 10.1186/s12955-017-0691-z [published Online First: 2017/06/01]
14. Kingori C, Reece M, Obeng S, et al. Psychometric evaluation of a cross-culturally adapted felt stigma questionnaire among people living with HIV in Kenya. *AIDS Patient Care STDS* 2013;27(8):481-8. doi: 10.1089/apc.2012.0403 [published Online First: 2013/08/24]
15. Wiklander M, Rydstrom LL, Ygge BM, et al. Psychometric properties of a short version of the HIV stigma scale, adapted for children with HIV infection. *Health Qual Life Outcomes* 2013;11(1):195. doi: 10.1186/1477-7525-11-195 [published Online First: 2013/11/15]
16. Holzemer WL, Uys LR, Chirwa ML, et al. Validation of the HIV/AIDS Stigma Instrument—PLWA (HASI-P). 2007;19(8):1002-12.



17. Stigma among mothers with HIV/AIDS. XIII International AIDS Conference, Durban, South Africa; 2000.
18. Fife BL, Wright ER. The dimensionality of stigma: a comparison of its impact on the self of persons with HIV/AIDS and cancer. *J Health Soc Behav* 2000;41(1):50-67. [published Online First: 2000/04/06]
19. Herek GM, Capitanio JP. Public reactions to AIDS in the United States: a second decade of stigma. *Am J Public Health* 1993;83(4):574-7. doi: 10.2105/ajph.83.4.574 [published Online First: 1993/04/01]
20. Sowell RL, Seals BF, Moneyham L, et al. Quality of life in HIV-infected women in the south-eastern United States. *AIDS Care* 1997;9(5):501-12. doi: 10.1080/713613191 [published Online First: 1997/12/24]
21. Jeyaseelan L, Kumar S, Mohanraj R, et al. Assessing HIV/AIDS stigma in South India: validation and abridgement of the Berger HIV stigma scale. 2013;17(1):434-43.
22. Bunn JY, Solomon SE, Miller C, et al. Measurement of stigma in people with HIV: a reexamination of the HIV Stigma Scale. *AIDS Educ Prev* 2007;19(3):198-208. doi: 10.1521/aeap.2007.19.3.198 [published Online First: 2007/06/15]
23. Emlert CA, Brennan DJ, Brennenstuhl S, et al. The impact of HIV-related stigma on older and younger adults living with HIV disease: does age matter? *AIDS care* 2015;27(4):520-28.
24. Pannetier J, Lelievre E, Le Coeur S. HIV-related stigma experiences: Understanding gender disparities in Thailand. *AIDS Care* 2016;28(2):170-8. doi: 10.1080/09540121.2015.1096888 [published Online First: 2015/10/20]
25. Endeshaw M, Walson J, Rawlins S, et al. Stigma in Ethiopia: association with depressive symptoms in people with HIV. *AIDS Care* 2014;26(8):935-9. doi: 10.1080/09540121.2013.869537 [published Online First: 2014/01/03]
26. Datta S, Bhattacharjee S, Sherpa PL, et al. Perceived HIV Related Stigma among Patients Attending ART Center of a Tertiary Care Center in Rural West Bengal, India. *Journal of clinical and diagnostic research : JCDR* 2016;10(10):VC09-VC12. doi: 10.7860/JCDR/2016/21366.8669 [published Online First: 2016/11/29]
27. Sorsdahl KR, Mall S, Stein DJ, et al. The prevalence and predictors of stigma amongst people living with HIV/AIDS in the Western Province. *AIDS Care* 2011;23(6):680-5. doi: 10.1080/09540121.2010.525621 [published Online First: 2011/03/02]
28. Yeo TED, Chu TH. Social-cultural factors of HIV-related stigma among the Chinese general population in Hong Kong. *AIDS Care* 2017;29(10):1255-59. doi: 10.1080/09540121.2017.1282601 [published Online First: 2017/01/24]
29. Cuca YP, Onono M, Bukusi E, et al. Factors associated with pregnant women's anticipations and experiences of HIV-related stigma in rural Kenya. *AIDS Care* 2012;24(9):1173-80. doi: 10.1080/09540121.2012.699669 [published Online First: 2012/07/18]
30. Girma E, Gebretsadik LA, Kaufman MR, et al. Stigma against people with HIV/AIDS in rural Ethiopia, 2005 to 2011: signs and predictors of improvement. *AIDS Behav* 2014;18(6):1046-53. doi: 10.1007/s10461-013-0611-0 [published Online First: 2013/09/28]
31. Takada S, Weiser SD, Kumbakumba E, et al. The Dynamic Relationship Between Social Support and HIV-Related Stigma in Rural Uganda. *Annals of Behavioral Medicine* 2014;48(1):26-37. doi: 10.1007/s12160-013-9576-5
32. Emlert CA. A comparison of HIV stigma and disclosure patterns between older and younger adults living with HIV/AIDS. *Aids Patient Care and Stds* 2006;20(5):350-58. doi: DOI 10.1089/apc.2006.20.350

33. Anakwa NO, Teye-Kwadjo E, Kretchy IA. Effect of HIV-Related Stigma and HIV-Related Stress on HIV Disclosure Concerns: a Study of HIV-Positive Persons on Antiretroviral Therapy at Two Urban Hospitals in Ghana. *Applied Research in Quality of Life* 2020:1-16.
34. Scott JA, Bauni E, Moisi JC, et al. Profile: The Kilifi Health and Demographic Surveillance System (KHDSS). *Int J Epidemiol* 2012;41(3):650-7. doi: 10.1093/ije/dys062 [published Online First: 2012/05/01]
35. Allocation(CRA) CoR. Kenya County Fact sheets: ; 2011 [Available from: [http://siteresources.worldbank.org/INTAFRICA/Resources/257994-1335471959878/Kenya\\_County\\_Fact\\_Sheets\\_Dec2011.pdf](http://siteresources.worldbank.org/INTAFRICA/Resources/257994-1335471959878/Kenya_County_Fact_Sheets_Dec2011.pdf) accessed 22nd August 2018.
36. Statistics KNBo, Africa SfIDE. Exploring Kenya's Inequality: Pulling Apart or Pooling Together?: KNBS and SIDS Nairobi, 2013.
37. Ngugi E, Kipruto S, Samoei PJKNBOS, et al. Exploring Kenya's Inequality: Pulling Apart or Pooling Together? Kilifi County. 2013
38. NACC. Kenya HIV County Profiles - 2016: National AIDS Control Council; 2016 [49-52]. Available from: <http://nacc.or.ke/wp-content/uploads/2016/12/Kenya-HIV-County-Profiles-2016.pdf> accessed 20th August 2018.
39. Spitzer RL, Kroenke K, Williams JB. Validation and utility of a self-report version of PRIME-MD: the PHQ primary care study. Primary Care Evaluation of Mental Disorders. Patient Health Questionnaire. *JAMA* 1999;282(18):1737-44. doi: 10.1001/jama.282.18.1737 [published Online First: 1999/11/24]
40. Monahan PO, Shacham E, Reece M, et al. Validity/reliability of PHQ-9 and PHQ-2 depression scales among adults living with HIV/AIDS in western Kenya. *J Gen Intern Med* 2009;24(2):189-97. doi: 10.1007/s11606-008-0846-z [published Online First: 2008/11/26]
41. Spitzer RL, Kroenke K, Williams JB, et al. A brief measure for assessing generalized anxiety disorder: the GAD-7. *Arch Intern Med* 2006;166(10):1092-7. doi: 10.1001/archinte.166.10.1092 [published Online First: 2006/05/24]
42. Osborn TL, Venturo-Conerly KE, Wasil AR, et al. Depression and anxiety symptoms, social support, and demographic factors among Kenyan high school students. *Journal of Child Family Studies* 2019:1-12.
43. Nyongesa MK, Mwangala PN, Mwangi P, et al. Neurocognitive and mental health outcomes and association with quality of life among adults living with HIV: a cross-sectional focus on a low-literacy population from coastal Kenya. *BMJ Open* 2018;8(9):e023914. doi: 10.1136/bmjopen-2018-023914 [published Online First: 2018/09/19]
44. Filmer D, Pritchett LHJD. Estimating wealth effects without expenditure data—or tears: an application to educational enrollments in states of India. *%J Demography* 2001;38(1):115-32.
45. Rosseel Y. Lavaan: An R package for structural equation modeling and more. Version 0.5–12 (BETA). *Journal of statistical software* 2012;48(2):1-36.
46. RCore T. R: A language and environment for statistical computing. R Foundation for Statistical Computing, Vienna, Austria. URL <http://www.R-project.org> 2016
47. Blunch N. Introduction to structural equation modeling using IBM SPSS statistics and AMOS: Sage 2012.
48. Van de Schoot R, Lugtig P, Hox J. A checklist for testing measurement invariance. *European Journal of Developmental Psychology* 2012;9(4):486-92.

- 1  
2  
3  
4  
5  
6  
7  
8  
9  
10  
11  
12  
13  
14  
15  
16  
17  
18  
19  
20  
21  
22  
23  
24  
25  
26  
27  
28  
29  
30  
31  
32  
33  
34  
35  
36  
37  
38  
39  
40  
41  
42  
43  
44  
45  
46  
47  
48  
49  
50  
51  
52  
53  
54  
55  
56  
57  
58  
59  
60
49. Cheung GW, Rensvold RB. Assessing extreme and acquiescence response sets in cross-cultural research using structural equations modeling. *Journal of cross-cultural psychology* 2000;31(2):187-212.
  50. Ware Jr JE, Gandek B, Joce. Methods for testing data quality, scaling assumptions, and reliability: the IQOLA Project approach. 1998;51(11):945-52.
  51. Cohen J. Statistical power analysis for the behavioural sciences, 2nd edn. (Hillsdale, NJ: L. Erlbaum Associates). 1988
  52. Tabachnik B, Fidell L. Using multivariate statistics (6e éd.). Boston, É.-U. U: *Pearson* 2013
  53. Streiner DL. A checklist for evaluating the usefulness of rating scales. *Canadian journal of psychiatry Revue canadienne de psychiatrie* 1993;38(2):140-8. doi: 10.1177/070674379303800214 [published Online First: 1993/03/01]
  54. Akena D, Joska J, Obuku EA, et al. Sensitivity and specificity of clinician administered screening instruments in detecting depression among HIV-positive individuals in Uganda. *AIDS Care* 2013;25(10):1245-52. doi: 10.1080/09540121.2013.764385 [published Online First: 2013/02/13]
  55. Jeyaseelan L, Kumar S, Mohanraj R, et al. Assessing HIV/AIDS stigma in south India: validation and abridgement of the Berger HIV Stigma scale. *AIDS Behav* 2013;17(1):434-43. doi: 10.1007/s10461-011-0128-3 [published Online First: 2012/01/17]
  56. Nattabi B, Li J, Thompson SC, et al. Factors associated with perceived stigma among people living with HIV/AIDS in post-conflict northern Uganda. *AIDS Education and Prevention* 2011;23(3):193-205.
  57. Swendeman D, Rotheram-Borus MJ, Comulada S, et al. Predictors of HIV-related stigma among young people living with HIV. *Health Psychol* 2006;25(4):501-9. doi: 10.1037/0278-6133.25.4.501 [published Online First: 2006/07/19]
  58. Asiedu GB, Myers-Bowman KS. Gender differences in the experiences of HIV/AIDS-related stigma: a qualitative study in Ghana. *Health Care Women Int* 2014;35(7-9):703-27. doi: 10.1080/07399332.2014.895367 [published Online First: 2014/02/26]
  59. Mugoya GC, Ernst K. Gender differences in HIV-related stigma in Kenya. *AIDS Care* 2014;26(2):206-13. doi: 10.1080/09540121.2013.808733 [published Online First: 2013/06/26]
  60. Mbonu NC, van den Borne B, De Vries NK. Stigma of People with HIV/AIDS in Sub-Saharan Africa: A Literature Review. *J Trop Med* 2009;2009:145891. doi: 10.1155/2009/145891 [published Online First: 2009/01/01]
  61. Amuyunzu-Nyamongo M, Okeng'o L, Wagura A, et al. Putting on a brave face: the experiences of women living with HIV and AIDS in informal settlements of Nairobi, Kenya. *AIDS Care* 2007;19 Suppl 1(sup1):S25-34. doi: 10.1080/09540120601114618 [published Online First: 2007/03/17]
  62. Muyinda H, Seeley J, Pickering H, et al. Social aspects of AIDS-related stigma in rural Uganda. 1997;3(3):143-47.
  63. Linda P. To tell or not to tell: negotiating disclosure for people living with HIV on antiretroviral treatment in a South African setting. *SAHARA J* 2013;10 Suppl 1(sup1):S17-27. doi: 10.1080/02664763.2012.755320 [published Online First: 2013/07/17]
  64. Evangeli M, Wroe AL. HIV Disclosure Anxiety: A Systematic Review and Theoretical Synthesis. *AIDS Behav* 2017;21(1):1-11. doi: 10.1007/s10461-016-1453-3 [published Online First: 2016/07/14]
  65. Nyongesa MK, Mwangi P, Wanjala SW, et al. Prevalence and correlates of depressive symptoms among adults living with HIV in rural Kilifi, Kenya. *BMC Psychiatry*



- 2019;19(1):333. doi: 10.1186/s12888-019-2339-5 [published Online First: 2019/11/05]
66. Charles B, Jeyaseelan L, Pandian AK, et al. Association between stigma, depression and quality of life of people living with HIV/AIDS (PLHA) in South India—a community based cross sectional study. 2012;12(1):463.
67. Yi S, Chhoun P, Suong S, et al. AIDS-related stigma and mental disorders among people living with HIV: a cross-sectional study in Cambodia. 2015;10(3):e0121461.
68. Liu Y, Gong H, Yang G, et al. Perceived stigma, mental health and unsafe sexual behaviors of people living with HIV/AIDS. 2014;39(7):658-63.
69. Onyebuchi-Iwudibia O, Brown A. HIV and depression in Eastern Nigeria: the role of HIV-related stigma. *AIDS Care* 2014;26(5):653-7. doi: 10.1080/09540121.2013.844761 [published Online First: 2013/10/19]
70. Oke OO, Akinboro AO, Olanrewaju FO, et al. Assessment of HIV-related stigma and determinants among people living with HIV/AIDS in Abeokuta, Nigeria: A cross-sectional study. *SAGE Open Medicine* 2019;7:2050312119869109.
71. Galvan FH, Davis EM, Banks D, et al. HIV stigma and social support among African Americans. 2008;22(5):423-36.
72. Stephenson R. Community factors shaping HIV-related stigma among young people in three African countries. *AIDS care* 2009;21(4):403-10.
73. Cianelli R, Villegas N, De Oliveira G, et al. Predictors of HIV enacted stigma among Chilean women. 2015;24(17-18):2392-401.
74. Li Z, Morano JP, Khoshnood K, et al. HIV-related stigma among people living with HIV/AIDS in rural Central China. 2018;18(1):453.
75. Chan BT, Tsai AC, Siedner MJ. HIV Treatment Scale-Up and HIV-Related Stigma in Sub-Saharan Africa: A Longitudinal Cross-Country Analysis. *Am J Public Health* 2015;105(8):1581-7. doi: 10.2105/AJPH.2015.302716 [published Online First: 2015/06/13]
76. Wolfe WR, Weiser SD, Leiter K, et al. The impact of universal access to antiretroviral therapy on HIV stigma in Botswana. *Am J Public Health* 2008;98(10):1865-71. doi: 10.2105/AJPH.2007.122044 [published Online First: 2008/08/16]
77. Jurgensen M, Sandoy IF, Michelo C, et al. Effects of home-based voluntary counselling and testing on HIV-related stigma: findings from a cluster-randomized trial in Zambia. *Soc Sci Med* 2013;81:18-25. doi: 10.1016/j.socscimed.2013.01.011 [published Online First: 2013/02/21]

Table 1: Participant's sociodemographic characteristics

| Sample Characteristics                                                                                                                               | N=450      | Total sample<br>% |
|------------------------------------------------------------------------------------------------------------------------------------------------------|------------|-------------------|
| <b>Sociodemographic characteristics</b>                                                                                                              |            |                   |
| Age – years (18-60), Median (IQR)                                                                                                                    | 43(14)     |                   |
| Gender                                                                                                                                               |            |                   |
| Female                                                                                                                                               | 356        | 79.1              |
| Male                                                                                                                                                 | 94         | 20.9              |
| Marital Status                                                                                                                                       |            |                   |
| Married/cohabiting                                                                                                                                   | 196        | 43.6              |
| Separated /Divorced/Widowed                                                                                                                          | 197        | 43.8              |
| Single/Never Married                                                                                                                                 | 57         | 12.7              |
| Education                                                                                                                                            |            |                   |
| Tertiary                                                                                                                                             | 22         | 4.9               |
| Secondary                                                                                                                                            | 66         | 14.7              |
| Primary                                                                                                                                              | 239        | 53.1              |
| None                                                                                                                                                 | 123        | 27.3              |
| Employment                                                                                                                                           |            |                   |
| Formally employed                                                                                                                                    | 53         | 11.8              |
| Self-employed                                                                                                                                        | 117        | 26.0              |
| Other                                                                                                                                                | 11         | 2.4               |
| Unemployed (including students)                                                                                                                      | 269        | 59.8              |
| Currently living with                                                                                                                                |            |                   |
| Family                                                                                                                                               | 371        | 82.4              |
| Relative/friend                                                                                                                                      | 10         | 2.2               |
| Alone                                                                                                                                                | 69         | 15.3              |
| Asset index score <sup>a</sup> – mean (SD)                                                                                                           | 1.2(1.4)   | 1.4               |
| Perceived HIV-stigma score <sup>b</sup> – mean (SD)                                                                                                  | 28.4(7.7)  | 7.7               |
| Any current chronic illness                                                                                                                          |            |                   |
| No                                                                                                                                                   | 413        | 91.8              |
| Yes                                                                                                                                                  | 37         | 8.2               |
| <b>Clinical characteristics</b>                                                                                                                      |            |                   |
| BMI – kg/m <sup>2</sup> , mean (SD), OM = 4                                                                                                          | 22.4 (4.8) |                   |
| cART regimen, OM = 4                                                                                                                                 |            |                   |
| First-line                                                                                                                                           | 425        | 95.3              |
| Second line                                                                                                                                          | 21         | 4.7               |
| Viral load, OM = 145                                                                                                                                 |            |                   |
| ≤ 1000 copies/mL                                                                                                                                     | 265        | 89.6              |
| > 1000 copies/mL                                                                                                                                     | 40         | 13.1              |
| WHO clinical stage, OM = 5                                                                                                                           |            |                   |
| Stage 1                                                                                                                                              | 417        | 93.7              |
| Stage 2                                                                                                                                              | 22         | 4.9               |
| Stage 3                                                                                                                                              | 3          | 0.7               |
| Stage 4                                                                                                                                              | 3          | 0.7               |
| Months since HIV diagnosis – Median (IQR)                                                                                                            | 106 (82)   |                   |
| Months since cART initiation – Median (IQR)                                                                                                          | 80.5 (76)  |                   |
| <b>Treatment Characteristics</b>                                                                                                                     |            |                   |
| HIV status disclosure                                                                                                                                |            |                   |
| Yes                                                                                                                                                  | 423        | 94.0              |
| No                                                                                                                                                   | 27         | 6.0               |
| Any current opportunistic infection                                                                                                                  |            |                   |
| No                                                                                                                                                   | 367        | 81.6              |
| Yes                                                                                                                                                  | 83         | 18.4              |
| Notes: OM = Observation with missing value, SD = Standard deviation, a - score range = 0 to 7, b – score range = 12 to 48, IQR = Interquartile range |            |                   |

Table 2: Descriptive statistics for items and subscales in the short form 12-item Swahili version of the HIV Stigma Scale

| Item                                                                                                                               | Mean item score <sup>a</sup> (SD) | Corrected item correlation | Mean subscale score <sup>b</sup> (SD) | Reliability                               |                          | Validity       |                | Construct    |              |              |
|------------------------------------------------------------------------------------------------------------------------------------|-----------------------------------|----------------------------|---------------------------------------|-------------------------------------------|--------------------------|----------------|----------------|--------------|--------------|--------------|
|                                                                                                                                    |                                   |                            |                                       | Internal consistency (Cronbach $\alpha$ ) | Test-Retest (ICC)        | $\neq$         | #              | CFI          | RMSEA        | TLI          |
| <b>Personalised Stigma</b>                                                                                                         |                                   |                            | 4.86(2.56)                            | 0.84 (95% CI; 0.81-0.86)                  | 0.83 (95% CI; 0.71-0.90) | <b>0.357**</b> | <b>0.327**</b> |              |              |              |
| Some people stop touching me soon they know/realise I am infected with HIV/AIDS                                                    | 1.66(1.01)                        | 0.65                       |                                       |                                           |                          |                |                |              |              |              |
| People I care for stopped calling me after knowing I suffer from AIDs.                                                             | 1.63(1.00)                        | 0.87                       |                                       |                                           |                          |                |                |              |              |              |
| I have lost friends for telling/explaining that I have AIDs.                                                                       | 1.59(0.96)                        | 0.88                       |                                       |                                           |                          |                |                |              |              |              |
| <b>Disclosure Concerns</b>                                                                                                         |                                   |                            | 8.74(2.37)                            | 0.53 (95% CI; 0.45-0.60)                  | 0.62 (95% CI; 0.36-0.77) | 0.070          | 0.070          |              |              |              |
| Telling someone that I have AIDs is dangerous*                                                                                     | 2.24(1.24)                        | 0.83                       |                                       |                                           |                          |                |                |              |              |              |
| I do all I can to keep my AIDs (HIV) status secret                                                                                 | 2.90(1.22)                        | 0.46                       |                                       |                                           |                          |                |                |              |              |              |
| I am very careful to that person I tell about my HIV status (I am cautious/ very careful to (?of) the people I tell my HIV status) | 3.60(0.78)                        | 0.21                       |                                       |                                           |                          |                |                |              |              |              |
| <b>Concerns about Public Attitudes</b>                                                                                             |                                   |                            | 8.52(3.17)                            | 0.83 (95% CI; 0.80-0.86)                  | 0.79 (95% CI; 0.65-0.88) | <b>0.187**</b> | <b>0.165**</b> |              |              |              |
| People who are suffering from AIDs are treated as if they are not like the other people.                                           | 3.05(1.18)                        | 0.68                       |                                       |                                           |                          |                |                |              |              |              |
| People believe that a person infected with HIV is dirty.                                                                           | 2.74(1.26)                        | 0.84                       |                                       |                                           |                          |                |                |              |              |              |
| Many people are worried when they are near a person infected with HIV.                                                             | 2.75(1.22)                        | 0.84                       |                                       |                                           |                          |                |                |              |              |              |
| <b>Negative Self Image</b>                                                                                                         |                                   |                            | 6.32(3.00)                            | 0.74 (95% CI; 0.70-0.80)                  | 0.76 (95% CI; 0.60-0.86) | <b>0.372**</b> | <b>0.330**</b> |              |              |              |
| I feel guilty because I am infected with HIV                                                                                       | 2.11(1.23)                        | 0.60                       |                                       |                                           |                          |                |                |              |              |              |
| People’s attitudes about HIV/AIDS makes me feel very bad.                                                                          | 2.23(1.25)                        | 0.78                       |                                       |                                           |                          |                |                |              |              |              |
| I feel I am not as good as others because I’m infected with HIV.                                                                   | 2.01(1.23)                        | 0.73                       |                                       |                                           |                          |                |                |              |              |              |
| <b>Overall</b>                                                                                                                     |                                   |                            | 28.44(7.68)                           | 0.80(95% CI; 0.77-0.83)                   | 0.92(95% CI; 0.87-0.95)  | <b>0.368**</b> | <b>0.328**</b> | <b>0.966</b> | <b>0.044</b> | <b>0.955</b> |

Pearson product-moment correlation coefficient; \*\*p<0.001; # correlation between HIV stigma and PHQ-9;  $\neq$  correlation between HIV stigma and GAD-7

<sup>a</sup>Possible score for each item 1-4; higher scores reflect a higher level of perceived HIV-related stigma

<sup>b</sup>Possible score 3-12 on each sub-scale; higher scores reflect a higher level of perceived HIV-related stigma. <sup>SD</sup> Standard deviation. CFI = Comparative Fit Index. RMSEA = Root Mean Square Error of Approximation and TLI=Tucker Lewis Index.

Table 3: Univariate linear Regression of correlates of perceived HIV-related stigma among adults living with HIV from rural Kilifi

| Independent variables                            | N   | Personalised Stigma      |              | Disclosure concerns        |                  | Dependent variables<br>Public attitudes |              | Negative self-image        |                  | Overall HIV Stigma Score |                  |
|--------------------------------------------------|-----|--------------------------|--------------|----------------------------|------------------|-----------------------------------------|--------------|----------------------------|------------------|--------------------------|------------------|
|                                                  |     | B (95% CI)               | p-value      | B (95% CI)                 | p-value          | B (95% CI)                              | p-value      | B (95% CI)                 | p-value          | B (95% CI)               | p-value          |
| <b>Sociodemographic characteristics</b>          |     |                          |              |                            |                  |                                         |              |                            |                  |                          |                  |
| <b>Age</b>                                       | 450 | -0.01 (-0.03, 0.02)      | 0.595        | 0.01 (-0.02, 0.02)         | 0.999            | 0.01 (-0.02, 0.04)                      | 0.399        | -0.01(-0.03, 0.03)         | 0.880            | 0.01 (-0.07, 0.08)       | 0.910            |
| <b>Gender</b>                                    | 450 |                          | <b>0.080</b> |                            | 0.297            |                                         | <b>0.004</b> |                            | 0.255            |                          | <b>0.011</b>     |
| Male                                             |     | Ref                      |              | Ref                        |                  | Ref                                     |              | Ref                        |                  | Ref                      |                  |
| Female                                           |     | <b>0.52(-0.06, 1.10)</b> |              | 0.29 (-0.25, 0.83)         |                  | <b>1.07(0.35, 1.79)</b>                 |              | 0.40 (-0.29, 1.08)         |                  | <b>2.27(0.54, 4.01)</b>  |                  |
| <b>Marital Status</b>                            | 450 |                          | <b>0.074</b> |                            | <b>0.018</b>     |                                         | 0.350        |                            | <b>0.054</b>     |                          | <b>0.018</b>     |
| Married                                          |     | Ref                      |              | Ref                        |                  | Ref                                     |              | Ref                        |                  | Ref                      |                  |
| Separated/Divorced/Widowed                       |     | <b>0.54(0.03, 1.04)</b>  |              | <b>0.67(0.20, 1.14)</b>    |                  | 0.25(-0.38, 0.87)                       |              | <b>0.73(0.14, 1.32)</b>    |                  | <b>2.18(0.67, 3.69)</b>  |                  |
| Single/never married                             |     | <b>0.61(-0.14, 1.37)</b> |              | 0.17 (-0.52, 0.87)         |                  | -0.43(-1.37, -0.51)                     |              | 0.40 (-0.49, 1.28)         |                  | 0.75(-1.50, 3.01)        |                  |
| <b>Education Level</b>                           | 450 |                          | 0.424        |                            | <b>0.003</b>     |                                         | <b>0.026</b> |                            | <b>&lt;0.001</b> |                          | <b>&lt;0.001</b> |
| Tertiary                                         |     | Ref                      |              | Ref                        |                  | Ref                                     |              | Ref                        |                  | Ref                      |                  |
| Secondary                                        |     | -0.12(-1.36, 1.12)       |              | 0.08 (-1.06, 1.21)         |                  | 0.68(-0.84, 2.21)                       |              | -0.03 (-1.46, 1.40)        |                  | 0.61(-3.05, 4.26)        |                  |
| Primary                                          |     | -0.31(-1.43, 0.81)       |              | 0.48 (-0.55, 1.51)         |                  | <b>1.32(-0.06, 2.70)</b>                |              | 0.72 (-0.57, 2.01)         |                  | <b>2.20(-1.10, 5.51)</b> |                  |
| None                                             |     | 0.15(-1.01, 1.32)        |              | <b>1.23(0.16, 2.30)</b>    |                  | <b>1.80(0.36, 3.23)</b>                 |              | <b>1.63(0.29, 2.97)</b>    |                  | <b>4.81(1.38, 8.25)</b>  |                  |
| <b>Employment Status</b>                         | 450 |                          | <b>0.191</b> |                            | 0.801            |                                         | 0.400        |                            | <b>0.071</b>     |                          | <b>0.098</b>     |
| Formally Employed                                |     | Ref                      |              | Ref                        |                  | Ref                                     |              | Ref                        |                  | Ref                      |                  |
| Self-employed                                    |     | <b>0.67(-0.16, 1.50)</b> |              | 0.27 (-0.50, 1.05)         |                  | 0.46(-0.57, 1.49)                       |              | <b>0.73(-0.24, 1.70)</b>   |                  | <b>2.13(-0.36, 4.62)</b> |                  |
| Other                                            |     | -0.67(-2.33, 0.99)       |              | -0.02 (-1.57, 1.53)        |                  | -1.14(-3.20, 0.93)                      |              | -0.35 (-2.29, 1.60)        |                  | -2.17(-7.15, 2.81)       |                  |
| Unemployed                                       |     | <b>0.51(-0.25, 1.26)</b> |              | 0.33 (-0.37, 1.03)         |                  | 0.18(-0.76, 1.11)                       |              | <b>1.03(0.15, 1.91)</b>    |                  | <b>2.04(-0.22, 4.30)</b> |                  |
| <b>Currently living with</b>                     | 450 |                          | 0.575        |                            | 0.714            |                                         | 0.974        |                            | 0.889            |                          | 0.897            |
| Immediate family                                 |     | Ref                      |              | Ref                        |                  | Ref                                     |              | Ref                        |                  | Ref                      |                  |
| Relative/friend                                  |     | 0.86(-0.75, 2.47)        |              | 0.02(-1.47, 1.52)          |                  | 0.18(-1.82, 2.18)                       |              | -0.45(-2.34, 1.45)         |                  | 0.62(-4.23, 5.46)        |                  |
| Alone                                            |     | 0.01(-0.65, 0.66)        |              | -0.25(-0.87, 0.36)         |                  | -0.06(-0.88, 0.76)                      |              | -0.07(-0.84, 0.70)         |                  | -0.38(-2.36, 1.60)       |                  |
| <b>Asset index score<sup>a</sup> – mean (SD)</b> | 450 | <b>-0.12(-0.29-0.05)</b> | <b>0.171</b> | <b>-0.13(-0.29-0.03)</b>   | <b>0.109</b>     | -0.11(-0.33-0.10)                       | 0.310        | -0.12(-0.32-0.08)          | 0.244            | <b>-0.48(-1.00-0.04)</b> | <b>0.068</b>     |
| <b>Clinical characteristics</b>                  |     |                          |              |                            |                  |                                         |              |                            |                  |                          |                  |
| <b>BMI – kg/m<sup>2</sup>, mean (SD), OM = 4</b> |     | 0.004(-0.04, 0.05)       | 0.855        | -0.03(-0.07,0.02)          | 0.244            | 0.03(-0.03,0.09)                        | 0.309        | -0.03(-0.18,0.12)          | 0.708            | -0.03(-0.18,0.12)        | 0.708            |
| <b>Viral Load OM = 145</b>                       | 305 |                          | <b>0.183</b> |                            | 0.805            |                                         | 0.894        |                            | <b>0.033</b>     |                          | <b>0.173</b>     |
| ≤ 1000 copies/ml                                 |     | Ref                      |              | Ref                        |                  | Ref                                     |              | Ref                        |                  | Ref                      |                  |
| > 1000 copies/ml                                 |     | <b>0.58(-0.28, 1.44)</b> |              | 0.10(-0.70, 0.90)          |                  | 0.07(-1.00, 1.14)                       |              | <b>1.05(0.08,2.02)</b>     |                  | <b>1.81(-0.79, 4.40)</b> |                  |
| Months since HIV diagnosis                       | 450 | 0.00(-0.00, 0.01)        | 0.346        | <b>-0.01(-0.01, -0.00)</b> | <b>&lt;0.001</b> | -0.00(-0.01,0.00)                       | 0.630        | <b>-0.01(-0.01,0.00)</b>   | <b>0.058</b>     | -0.01(-0.03,0.00)        | <b>0.091</b>     |
| Months since cART initiation OM = 4              | 446 | 0.00(-0.00,0.01)         | 0.497        | <b>-0.01(-0.01, -0.00)</b> | <b>0.001</b>     | <b>-0.00(-0.01,0.00)</b>                | <b>0.202</b> | <b>-0.01(-0.01, -0.00)</b> | <b>0.0308</b>    | -0.02(-0.03, -0.00)      | <b>0.031</b>     |
| <b>Treatment characteristics</b>                 |     |                          |              |                            |                  |                                         |              |                            |                  |                          |                  |
| HIV status disclosure                            | 450 |                          | 0.651        |                            | <b>&lt;0.001</b> |                                         | 0.287        |                            | 0.228            |                          | <b>0.023</b>     |

1  
2  
3  
4  
5  
6  
7  
8  
9  
10  
11  
12  
13  
14  
15  
16  
17  
18  
19  
20  
21  
22  
23  
24  
25  
26  
27  
28  
29  
30  
31  
32  
33  
34  
35  
36  
37  
38  
39  
40  
41  
42  
43  
44  
45  
46

|                                             |     |                         |                  |                        |       |                          |  |                         |  |                          |
|---------------------------------------------|-----|-------------------------|------------------|------------------------|-------|--------------------------|--|-------------------------|--|--------------------------|
| Yes                                         |     | Ref                     |                  | Ref                    |       | Ref                      |  | Ref                     |  | Ref                      |
| No                                          |     | 0.23(-0.77,1.23)        |                  | <b>1.86(0.94,2.77)</b> | 0.768 | 0.67(-0.57,1.91)         |  | 0.72(-0.45,1.89)        |  | <b>3.47(0.49,6.46)</b>   |
| <b>Any current opportunistic infections</b> | 450 |                         | <b>0.037</b>     |                        |       | 0.759                    |  | <b>0.017</b>            |  | <b>0.065</b>             |
| No                                          |     |                         |                  |                        |       |                          |  |                         |  |                          |
| Yes                                         |     | <b>0.65(0.04,1.26)</b>  |                  | 0.09(-0.48,0.65)       | 0.741 | 0.12(-0.64,0.88)         |  | 0.87(0.16,1.59)         |  | 1.72(-0.11,3.55)         |
| <b>CMD comorbidity OM = 48</b>              | 402 |                         | <b>&lt;0.001</b> |                        |       | <b>0.145</b>             |  | <b>&lt;0.001</b>        |  | <b>&lt;0.001</b>         |
| Absence                                     |     | Ref                     |                  | Ref                    |       | Ref                      |  | Ref                     |  | Ref                      |
| Presence                                    |     | <b>2.71(1.58, 3.84)</b> |                  | 0.18 (-0.91, 1.28)     |       | <b>1.09(-0.38, 2.55)</b> |  | <b>3.07(1.76, 4.39)</b> |  | <b>7.06(3.71, 10.41)</b> |

---

Notes: Overall stigma scale represents the sum of all twelve items from the four subscales; A negative stigma score indicates less stigma. Bolded are variables taken into multivariate linear regression. *CMD* – symptoms of depression and anxiety, *BMI* body mass index, *WHO* world health organisation, *Ref* - Reference category, *OM* observation with missing value, *cART* combination antiretroviral therapy, *a* score range = 0 to 7, *b* score range = 12 to 48.

---

For peer review only

Table 4: Multivariate linear Regression of correlates of perceived HIV-related stigma among adults living with HIV from rural Kilifi

| Independent variables                                                                                                                                                                                                                   | Dependent variables         |                  |                             |                  |                          |              |                             |                  |                                  |                  |
|-----------------------------------------------------------------------------------------------------------------------------------------------------------------------------------------------------------------------------------------|-----------------------------|------------------|-----------------------------|------------------|--------------------------|--------------|-----------------------------|------------------|----------------------------------|------------------|
|                                                                                                                                                                                                                                         | Personalised stigma (n=402) |                  | Disclosure concerns (n=450) |                  | Public attitudes (n=450) |              | Negative self-image (n=402) |                  | Overall HIV Stigma Score (n=402) |                  |
|                                                                                                                                                                                                                                         | B (95% CI)                  | p-value          | B (95% CI)                  | p-value          | B (95% CI)               | p-value      | B (95% CI)                  | p-value          | B (95% CI)                       | p-value          |
| <b>Sociodemographic characteristics</b>                                                                                                                                                                                                 |                             |                  |                             |                  |                          |              |                             |                  |                                  |                  |
| <b>Gender</b>                                                                                                                                                                                                                           |                             |                  |                             |                  |                          |              |                             |                  |                                  |                  |
| Male                                                                                                                                                                                                                                    | Ref                         |                  |                             |                  | Ref                      |              |                             |                  | Ref                              |                  |
| Female                                                                                                                                                                                                                                  | <b>0.75(0.17, 1.34)</b>     | <b>0.012</b>     |                             |                  | <b>1.07(0.35,1.79)</b>   | <b>0.003</b> |                             |                  | <b>2.00(0.21,3.80)</b>           | <b>0.029</b>     |
| <b>Education Level</b>                                                                                                                                                                                                                  |                             |                  |                             |                  |                          |              |                             |                  |                                  |                  |
| Tertiary                                                                                                                                                                                                                                |                             |                  | Ref                         |                  |                          |              | Ref                         |                  | Ref                              |                  |
| Secondary                                                                                                                                                                                                                               |                             |                  | -0.04(-1.14,1.07)           | 0.950            |                          |              | -0.05(-1.44,1.33)           |                  | -0.34(-3.83,3.16)                | 0.850            |
| Primary                                                                                                                                                                                                                                 |                             |                  | 0.48(-0.52,1.48)            | 0.346            |                          |              | 0.51(-0.73,1.74)            |                  | 1.37(-1.75,4.50)                 | 0.388            |
| None                                                                                                                                                                                                                                    |                             |                  | <b>1.24(0.20,2.28)</b>      | <b>0.019</b>     |                          |              | <b>1.33(0.04, 2.62)</b>     | <b>0.044</b>     | <b>3.32(-0.01,6.65)</b>          | <b>0.051</b>     |
| <b>Clinical characteristics</b>                                                                                                                                                                                                         |                             |                  |                             |                  |                          |              |                             |                  |                                  |                  |
| Months since HIV diagnosis                                                                                                                                                                                                              |                             |                  | <b>-0.01(-0.01, -0.00)</b>  | <b>0.007</b>     |                          |              |                             |                  |                                  |                  |
| <b>Treatment characteristics</b>                                                                                                                                                                                                        |                             |                  |                             |                  |                          |              |                             |                  |                                  |                  |
| <b>HIV status disclosure</b>                                                                                                                                                                                                            |                             |                  |                             |                  |                          |              |                             |                  |                                  |                  |
| Yes                                                                                                                                                                                                                                     |                             |                  | Ref                         |                  |                          |              |                             |                  | Ref                              |                  |
| No                                                                                                                                                                                                                                      |                             |                  | <b>1.79(0.88,2.70)</b>      | <b>&lt;0.001</b> |                          |              |                             |                  | <b>4.24(1.27,7.20)</b>           | <b>0.005</b>     |
| <b>CMD comorbidity</b>                                                                                                                                                                                                                  |                             |                  |                             |                  |                          |              |                             |                  |                                  |                  |
| Absence                                                                                                                                                                                                                                 | Ref                         |                  |                             |                  |                          |              | Ref                         |                  | Ref                              |                  |
| Presence                                                                                                                                                                                                                                | <b>2.67(1.55, 3.79)</b>     | <b>&lt;0.001</b> |                             |                  |                          |              | <b>3.04(1.74, 4.34)</b>     | <b>&lt;0.001</b> | <b>6.67(3.40,9.94)</b>           | <b>&lt;0.001</b> |
| Variance explained by the model Pseudo R-squared                                                                                                                                                                                        | <b>6.76%</b>                |                  | <b>8.66%</b>                |                  | <b>1.89%</b>             |              | <b>7.71%</b>                |                  | <b>10.17%</b>                    |                  |
| Notes: Overall stigma scale represents the sum of all twelve items from the four sub-scales. Bolded are statistically significant values – symptoms of depression and anxiety, 95% CI - 95% confidence interval, Ref reference category |                             |                  |                             |                  |                          |              |                             |                  |                                  |                  |

1  
2  
3  
4  
5  
6  
7  
8  
9  
10  
11  
12  
13  
14  
15  
16  
17  
18  
19  
20  
21  
22  
23  
24  
25  
26  
27  
28  
29  
30  
31  
32  
33  
34  
35  
36  
37  
38  
39  
40  
41  
42  
43  
44  
45  
46

Table 5: Multi-Group Confirmatory Factor Analysis for age and gender sub-groups

| Invariance Steps      | Gender | RMSEA | TLI   | CFI   | ΔCFI         | Age          | RMSEA | TLI   | CFI   | ΔCFI         |
|-----------------------|--------|-------|-------|-------|--------------|--------------|-------|-------|-------|--------------|
| Configural Invariance | Female | 0.051 | 0.934 | 0.950 |              | Older adults | 0.040 | 0.960 | 0.970 |              |
|                       | Male   | 0.051 | 0.934 | 0.950 |              | Young Adults | 0.040 | 0.960 | 0.970 |              |
| Metric Invariance     | Female | 0.052 | 0.932 | 0.943 | <b>0.007</b> | Older adults | 0.042 | 0.957 | 0.964 | <b>0.006</b> |
|                       | Male   | 0.052 | 0.932 | 0.943 | <b>0.007</b> | Young Adults | 0.042 | 0.957 | 0.964 | <b>0.006</b> |
| Scalar Invariance     | Female | 0.050 | 0.936 | 0.943 | <b>0.000</b> | Older adults | 0.041 | 0.959 | 0.963 | <b>0.001</b> |
|                       | Male   | 0.050 | 0.936 | 0.943 | <b>0.000</b> | Young Adults | 0.041 | 0.959 | 0.963 | <b>0.001</b> |
| Strict Invariance     | Female | 0.048 | 0.941 | 0.942 | <b>0.001</b> | Older adults | 0.041 | 0.959 | 0.960 | <b>0.003</b> |
|                       | Male   | 0.048 | 0.941 | 0.942 | <b>0.001</b> | Young Adults | 0.041 | 0.959 | 0.960 | <b>0.003</b> |

Notes: CFI = Comparative Fit Index. RMSEA = Root Mean Square Error of Approximation and TLI=Tucker Lewis Index. Configural invariance - no constraints; Full metric invariance with all factor loadings constrained equal. Scalar invariance - with all intercepts constrained equal: Measurement invariance is assumed when ΔCFI is ≤0.01

Peer review only

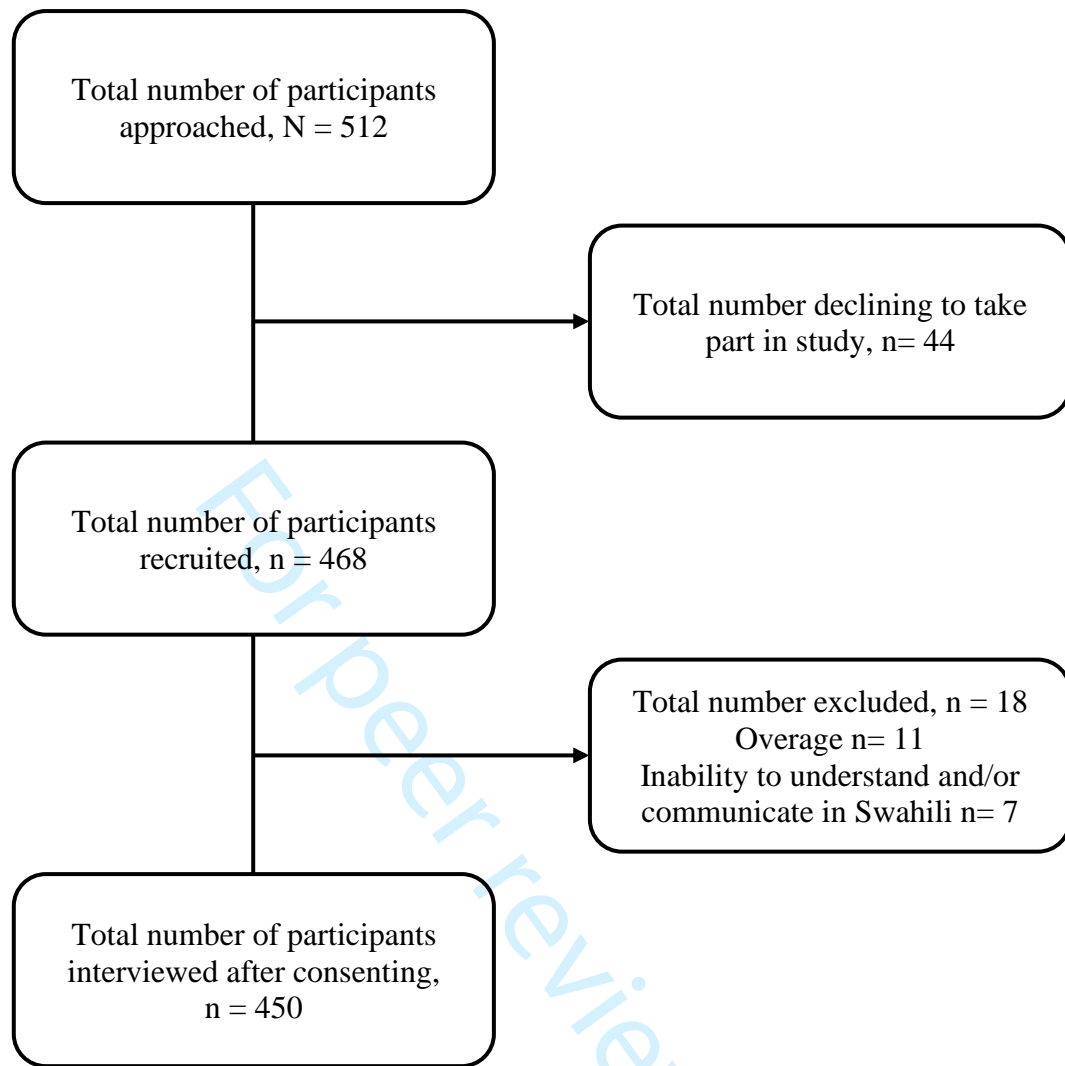

Figure 1: Study recruitment flow chart



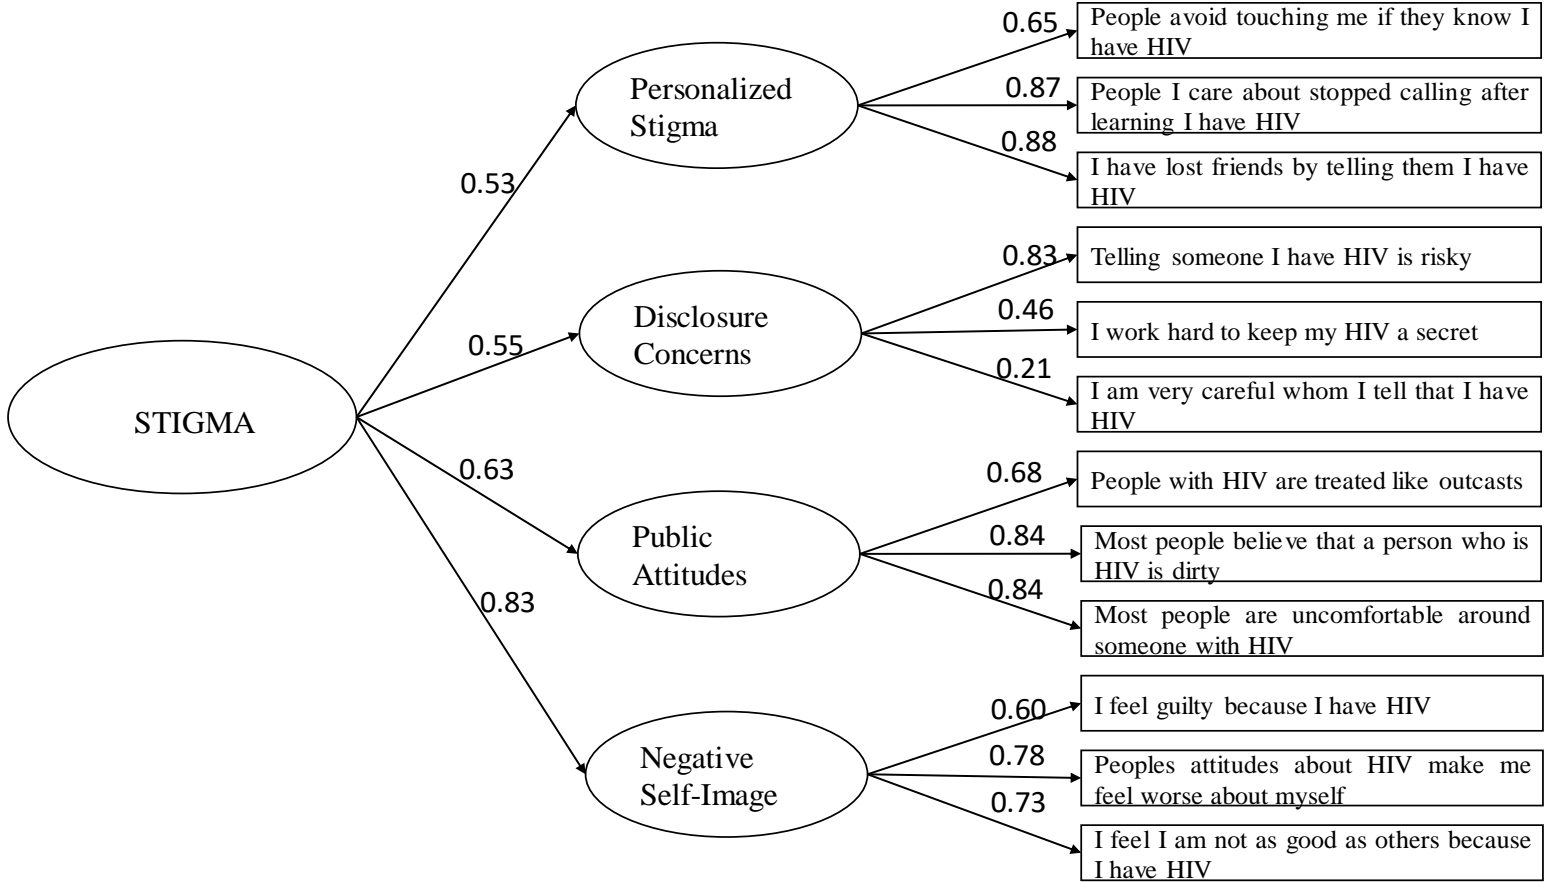

Supplementary Figure 1: Confirmatory factor analysis of the short version of the HIV Stigma Scale. Results show correlations between subscales (circles) and maximum likelihood estimates for the relation between subscales and items (rectangles). Sample (n = 435). Maximum likelihood estimates are standardised

**STROBE 2007 (v4) Statement—Checklist of items that should be included in reports of *cross-sectional studies***

| Section/Topic                | Item # | Recommendation                                                                                                                                                                       | Reported on page # |
|------------------------------|--------|--------------------------------------------------------------------------------------------------------------------------------------------------------------------------------------|--------------------|
| <b>Title and abstract</b>    | 1      | (a) Indicate the study's design with a commonly used term in the title or the abstract                                                                                               | 2                  |
|                              |        | (b) Provide in the abstract an informative and balanced summary of what was done and what was found                                                                                  | 2                  |
| <b>Introduction</b>          |        |                                                                                                                                                                                      |                    |
| Background/rationale         | 2      | Explain the scientific background and rationale for the investigation being reported                                                                                                 | 4-5                |
| Objectives                   | 3      | State specific objectives, including any prespecified hypotheses                                                                                                                     | 5                  |
| <b>Methods</b>               |        |                                                                                                                                                                                      |                    |
| Study design                 | 4      | Present key elements of study design early in the paper                                                                                                                              | 5                  |
| Setting                      | 5      | Describe the setting, locations, and relevant dates, including periods of recruitment, exposure, follow-up, and data collection                                                      | 5-8                |
| Participants                 | 6      | (a) Give the eligibility criteria, and the sources and methods of selection of participants                                                                                          | 6                  |
| Variables                    | 7      | Clearly define all outcomes, exposures, predictors, potential confounders, and effect modifiers. Give diagnostic criteria, if applicable                                             | 6-8                |
| Data sources/<br>measurement | 8*     | For each variable of interest, give sources of data and details of methods of assessment (measurement). Describe comparability of assessment methods if there is more than one group | 6-8                |
| Bias                         | 9      | Describe any efforts to address potential sources of bias                                                                                                                            | 6&8                |
| Study size                   | 10     | Explain how the study size was arrived at                                                                                                                                            | 6                  |
| Quantitative variables       | 11     | Explain how quantitative variables were handled in the analyses. If applicable, describe which groupings were chosen and why                                                         | 9                  |
| Statistical methods          | 12     | (a) Describe all statistical methods, including those used to control for confounding                                                                                                | 8-10               |
|                              |        | (b) Describe any methods used to examine subgroups and interactions                                                                                                                  | N/A                |
|                              |        | (c) Explain how missing data were addressed                                                                                                                                          | N/A                |
|                              |        | (d) If applicable, describe analytical methods taking account of sampling strategy                                                                                                   | 8-9                |
|                              |        | (e) Describe any sensitivity analyses                                                                                                                                                | N/A                |
| <b>Results</b>               |        |                                                                                                                                                                                      |                    |

|                          |     |                                                                                                                                                                                                              |       |
|--------------------------|-----|--------------------------------------------------------------------------------------------------------------------------------------------------------------------------------------------------------------|-------|
| Participants             | 13* | (a) Report numbers of individuals at each stage of study—eg numbers potentially eligible, examined for eligibility, confirmed eligible, included in the study, completing follow-up, and analysed            | 29    |
|                          |     | (b) Give reasons for non-participation at each stage - see details in figure 1                                                                                                                               | 29    |
|                          |     | (c) Consider use of a flow diagram                                                                                                                                                                           | 29    |
| Descriptive data         | 14* | (a) Give characteristics of study participants (eg demographic, clinical, social) and information on exposures and potential confounders                                                                     | 10    |
|                          |     | (b) Indicate number of participants with missing data for each variable of interest                                                                                                                          | 23    |
| Outcome data             | 15* | Report numbers of outcome events or summary measures                                                                                                                                                         |       |
| Main results             | 16  | (a) Give unadjusted estimates and, if applicable, confounder-adjusted estimates and their precision (eg, 95% confidence interval). Make clear which confounders were adjusted for and why they were included | 25-27 |
|                          |     | (b) Report category boundaries when continuous variables were categorized - see details in Table 1                                                                                                           | 23    |
|                          |     | (c) If relevant, consider translating estimates of relative risk into absolute risk for a meaningful time period                                                                                             | N/A   |
| Other analyses           | 17  | Report other analyses done—eg analyses of subgroups and interactions, and sensitivity analyses                                                                                                               | N/A   |
| <b>Discussion</b>        |     |                                                                                                                                                                                                              |       |
| Key results              | 18  | Summarise key results with reference to study objectives                                                                                                                                                     | 10    |
| Limitations              | 19  | Discuss limitations of the study, taking into account sources of potential bias or imprecision. Discuss both direction and magnitude of any potential bias                                                   | 15    |
| Interpretation           | 20  | Give a cautious overall interpretation of results considering objectives, limitations, multiplicity of analyses, results from similar studies, and other relevant evidence                                   | 12-15 |
| Generalisability         | 21  | Discuss the generalisability (external validity) of the study results                                                                                                                                        | 15    |
| <b>Other information</b> |     |                                                                                                                                                                                                              |       |
| Funding                  | 22  | Give the source of funding and the role of the funders for the present study and, if applicable, for the original study on which the present article is based                                                | 16    |

\*Give information separately for cases and controls in case-control studies and, if applicable, for exposed and unexposed groups in cohort and cross-sectional studies.

**Note:** An Explanation and Elaboration article discusses each checklist item and gives methodological background and published examples of transparent reporting. The STROBE checklist is best used in conjunction with this article (freely available on the Web sites of PLoS Medicine at <http://www.plosmedicine.org/>, Annals of Internal Medicine at <http://www.annals.org/>, and Epidemiology at <http://www.epidem.com/>). Information on the STROBE Initiative is available at [www.strobe-statement.org](http://www.strobe-statement.org).

# BMJ Open

## Measurement characteristics and correlates of HIV-related stigma among adults living with HIV: A cross-sectional study from coastal Kenya

|                                 |                                                                                                                                                                                                                                                                                                                                                                                                                                                                                                                                                                                                                                                                                                                                                                                                                                                                                                                                                                                                                                                   |
|---------------------------------|---------------------------------------------------------------------------------------------------------------------------------------------------------------------------------------------------------------------------------------------------------------------------------------------------------------------------------------------------------------------------------------------------------------------------------------------------------------------------------------------------------------------------------------------------------------------------------------------------------------------------------------------------------------------------------------------------------------------------------------------------------------------------------------------------------------------------------------------------------------------------------------------------------------------------------------------------------------------------------------------------------------------------------------------------|
| Journal:                        | <i>BMJ Open</i>                                                                                                                                                                                                                                                                                                                                                                                                                                                                                                                                                                                                                                                                                                                                                                                                                                                                                                                                                                                                                                   |
| Manuscript ID                   | bmjopen-2021-050709.R1                                                                                                                                                                                                                                                                                                                                                                                                                                                                                                                                                                                                                                                                                                                                                                                                                                                                                                                                                                                                                            |
| Article Type:                   | Original research                                                                                                                                                                                                                                                                                                                                                                                                                                                                                                                                                                                                                                                                                                                                                                                                                                                                                                                                                                                                                                 |
| Date Submitted by the Author:   | 14-Sep-2021                                                                                                                                                                                                                                                                                                                                                                                                                                                                                                                                                                                                                                                                                                                                                                                                                                                                                                                                                                                                                                       |
| Complete List of Authors:       | Wanjala, Stanley; Ghent University Faculty of Medicine and Health Sciences, Public Health and Primary Care; Pwani University School of Humanities and Social Sciences, Social Sciences<br>Nyongesa, Moses; Centre for Geographic Medicine Research Coast, Clinical Neurosciences; Vrije Universiteit Amsterdam, Clinical, Neuro- and Developmental Psychology, Amsterdam Public Health Research Institute<br>Mwangi, Paul; Centre for Geographic Medicine Research Coast, Clinical Neurosciences<br>Mutua, Agnes M.; Centre for Geographic Medicine Research Coast, Clinical Neurosciences<br>Luchters, Stanley; Ghent University Faculty of Medicine and Health Sciences, Public Health and Primary Care; Aga Khan University - Kenya, Population Health<br>Newton, Charles; Centre for Geographic Medicine Research Coast, Clinical Neurosciences; Oxford University, Psychiatry<br>Abubakar, Amina A.; Centre for Geographic Medicine Research Coast, Clinical Neurosciences; The Aga Khan University - Kenya, Institute for Human Development |
| <b>Primary Subject Heading</b>: | HIV/AIDS                                                                                                                                                                                                                                                                                                                                                                                                                                                                                                                                                                                                                                                                                                                                                                                                                                                                                                                                                                                                                                          |
| Secondary Subject Heading:      | HIV/AIDS, Infectious diseases, Public health                                                                                                                                                                                                                                                                                                                                                                                                                                                                                                                                                                                                                                                                                                                                                                                                                                                                                                                                                                                                      |
| Keywords:                       | HIV & AIDS < INFECTIOUS DISEASES, Epidemiology < INFECTIOUS DISEASES, PUBLIC HEALTH                                                                                                                                                                                                                                                                                                                                                                                                                                                                                                                                                                                                                                                                                                                                                                                                                                                                                                                                                               |
|                                 |                                                                                                                                                                                                                                                                                                                                                                                                                                                                                                                                                                                                                                                                                                                                                                                                                                                                                                                                                                                                                                                   |

SCHOLARONE™  
Manuscripts



I, the Submitting Author has the right to grant and does grant on behalf of all authors of the Work (as defined in the below author licence), an exclusive licence and/or a non-exclusive licence for contributions from authors who are: i) UK Crown employees; ii) where BMJ has agreed a CC-BY licence shall apply, and/or iii) in accordance with the terms applicable for US Federal Government officers or employees acting as part of their official duties; on a worldwide, perpetual, irrevocable, royalty-free basis to BMJ Publishing Group Ltd ("BMJ") its licensees and where the relevant Journal is co-owned by BMJ to the co-owners of the Journal, to publish the Work in this journal and any other BMJ products and to exploit all rights, as set out in our [licence](#).

The Submitting Author accepts and understands that any supply made under these terms is made by BMJ to the Submitting Author unless you are acting as an employee on behalf of your employer or a postgraduate student of an affiliated institution which is paying any applicable article publishing charge ("APC") for Open Access articles. Where the Submitting Author wishes to make the Work available on an Open Access basis (and intends to pay the relevant APC), the terms of reuse of such Open Access shall be governed by a Creative Commons licence – details of these licences and which [Creative Commons](#) licence will apply to this Work are set out in our licence referred to above.

Other than as permitted in any relevant BMJ Author's Self Archiving Policies, I confirm this Work has not been accepted for publication elsewhere, is not being considered for publication elsewhere and does not duplicate material already published. I confirm all authors consent to publication of this Work and authorise the granting of this licence.

1  
2  
3 **Measurement characteristics and correlates of HIV-related stigma among adults living**  
4  
5 **with HIV: A cross-sectional study from coastal Kenya**  
6  
7

8 Stanley W. Wanjala<sup>1,2\*</sup>, Moses K. Nyongesa<sup>3,4</sup>, Paul Mwangi<sup>3</sup>, Agnes M. Mutua<sup>3</sup>, Stanley  
9 Luchters<sup>1,5,6</sup>, Charles R.J.C. Newton<sup>3,7,8</sup>, Amina A Abubakar<sup>3,7,8,9</sup>

10  
11 <sup>1</sup>Department of Public Health and Primary Care, Ghent University, Ghent, Belgium

12  
13 <sup>2</sup>Department of Social Sciences, Pwani University, Kilifi, Kenya

14  
15 <sup>3</sup>Neuroassessment Group, KEMRI/Wellcome Trust Research Programme, Centre for  
16 Geographic Medicine Research (Coast), Kilifi, Kenya.

17  
18 <sup>4</sup>Department of Clinical, Neuro- & Developmental Psychology, Vrije Universiteit  
19 Amsterdam, Amsterdam, Netherlands

20  
21 <sup>5</sup>Department of Epidemiology and Preventive Medicine, Monash University, Melbourne,  
22 Australia

23  
24 <sup>6</sup>Department of Population Health, Aga Khan University, Nairobi, Kenya

25  
26 <sup>7</sup>Department of Public Health, Pwani University, Kilifi, Kenya

27  
28 <sup>8</sup>Department of Psychiatry, University of Oxford, Oxford, UK

29  
30 <sup>9</sup>Institute for Human Development, Aga Khan University, Nairobi, Kenya  
31  
32  
33  
34  
35  
36  
37  
38  
39  
40  
41

42 ***Address of the corresponding author:*** Stanley W. Wanjala, Department of Social Sciences  
43 Pwani University, Box 195-80108, Kilifi, Kenya. Email: s.wanjala@pu.ac.ke  
44  
45  
46  
47  
48  
49  
50  
51  
52  
53  
54  
55  
56  
57  
58  
59  
60

## 1 Abstract

2 **Objective** We studied the psychometric properties of the 12-item short version of the Berger  
3 HIV stigma scale and assessed the correlates of HIV-related stigma among adults living with  
4 HIV on the Kenyan coast.

5 **Design** Cross-sectional study.

6 **Setting** Comprehensive Care and Research Centre in the Kilifi County Hospital.

7 **Participants** Adults living with HIV on combination antiretroviral therapy were recruited and  
8 interviewed between February and April 2018 (n=450).

9 **Main outcome measures** HIV-related stigma

10 **Results** 450 participants with a median age of 43 years (interquartile range [IQR] = 36-50)  
11 took part in the study. Of these, 356 (79.1%) were female. Scale reliability and validity were  
12 high ( $\alpha=0.80$ , test-retest reliability intraclass correlation coefficient =0.92). Using  
13 confirmatory factor analysis, we observed that the 12-item short version of the HIV stigma  
14 scale had a good fit for its hypothesised model (Comparative Fit Index =0.966, Tucker Lewis  
15 Index = 0.955, Root Mean Square Error of Approximation = 0.044). Multi-group confirmatory  
16 factor analysis indicated measurement invariance across gender and age groups as  $\Delta CFI$  was  
17  $\leq 0.01$ . Multivariate linear regression established that being female ( $\beta=2.001$ , 95%CI: 0.21,  
18 3.80,  $p= 0.029$ ), HIV status non-disclosure ( $\beta=4.237$ , 95%CI: 1.27, 7.20,  $p= 0.005$ ) and co-  
19 occurrence of depressive and anxiety symptoms ( $\beta=6.670$ , 95%CI: 3.40, 9.94,  $p<0.001$ ) were  
20 significant predictors of perceived HIV-related stigma and that these variables accounted for  
21 10.2% of the explained variability in HIV-related stigma among adults living with HIV from  
22 Kilifi.

23 **Conclusions** Our results indicate that the 12-item short version of the HIV stigma scale is a  
24 valid and reliable measure of HIV stigma in Kenya. Furthermore, our study indicates that  
25 interventions aimed at reducing stigma need to take into account gender to address the specific  
26 needs of women, people who have not disclosed their HIV status, and those exhibiting  
27 symptoms of depression and anxiety, thereby improving their quality of life.

28 **Keywords:** Adults, Stigma, Predictors, HIV/AIDS, antiretroviral therapy, Psychometrics,  
29 Kenya

1  
2  
3 **30 Article Summary**  
4  
5

6 **31 Strengths and limitations of this study**  
7

- 8  
9 • This is the first study to report the 12-item HIV stigma scale's measurement  
10 characteristics in the sub-Saharan African context.  
11  
12 • We report on the correlates of HIV stigma based on a culturally adapted measurement  
13 tool with good psychometric properties.  
14  
15 • We cannot generalise our findings to all adults living with HIV in Kenya as data were  
16 collected from one geographical setting and excluded adults older than 60 years.  
17  
18 • We cannot conclude how individuals experience stigma over time because of the study  
19 design limitation.  
20  
21  
22  
23  
24  
25  
26  
27  
28  
29  
30  
31  
32  
33  
34  
35  
36  
37  
38  
39



## 40 Introduction

41 HIV/AIDS remains a considerable public health concern globally, with sub-Saharan Africa  
42 (SSA) bearing the most HIV-related disease burden.<sup>1</sup> Despite SSA making up about 11% of  
43 the earth's population, it is the world's epicentre of HIV/AIDS. By the close of 2019, an  
44 estimated 38 million people were living with HIV globally, with an estimated 68% living in  
45 SSA, accounting for two-thirds of all individuals living with HIV.<sup>1</sup> Between 2010 and mid-  
46 2020, there has been an upsurge in the number of people accessing antiretroviral therapy (7.8-  
47 26 million).<sup>1</sup> Further, between 2010 and 2019, new HIV infections declined by an estimated  
48 16% from 2.1 million/year to 1.7 million/year, and AIDS-related deaths dropped from 1.1  
49 million to around 690,000 per year.<sup>1</sup> By the end of 2019, an estimated 1.5 million Kenyans  
50 were living with HIV, with 42,000 new infections and 21,000 AIDS-related deaths reported.<sup>2</sup>  
51 Estimates show that between 80% to 90% of the people living with HIV/AIDS (PLWHA) in  
52 Kenya are adults.<sup>3</sup> Additionally, 75% of adults in Kenya are reported to be on antiretroviral  
53 treatment.<sup>2</sup>

54 Erving Goffman<sup>4</sup> defined stigma as a process through which individuals are 'disqualified from  
55 full social acceptance' due to an undesirable 'mark' or 'label.' This label can either be a  
56 physical, health, or behavioural attribute that is regarded as 'deeply discrediting.'<sup>4</sup> In this study,  
57 the label is HIV seropositive status. Additionally, stigma, defined as a 'mark,' sets a person  
58 apart from others and links the person to undesirable characteristics such as stereotypes.<sup>5</sup> HIV-  
59 related stigma among PLWHA is prevalent throughout SSA.<sup>6</sup> HIV-related stigma has been  
60 identified as a severe obstacle in the way of effective responses to HIV.<sup>7</sup>

61 Although efforts have been scaled up to raise awareness and increase public knowledge about  
62 HIV since the epidemic started decades ago, social stigma is still associated with the disease.<sup>8</sup>  
63 Research has demonstrated that stigma keeps people from adopting HIV preventive behaviours  
64 and accessing needed care and treatment,<sup>9</sup> negatively impacting their health and well-being.  
65 Among women living with HIV, the decision to disclose their HIV seropositive status is likely  
66 affected by perceived stigma.<sup>10</sup>

67 From previous research, HIV stigma experienced by PLWHA can either be enacted,  
68 anticipated, or internalised.<sup>11</sup> Enacted stigma includes an individual's experiences, prejudice,  
69 and/or discrimination from others because of one's HIV status. Anticipated stigma includes an  
70 individual's expectation of experiencing enacted stigma, while internalised stigma refers to the  
71 extent to which PLWHA have adopted negative feelings and beliefs about PLWHA.<sup>12</sup>

1  
2  
3 72 A variety of instruments designed to measure HIV-related stigma have been published.<sup>13-21</sup>  
4  
5 73 Berger's 40-item HIV stigma scale (HSS-40) is the most commonly used instrument and one  
6  
7 74 of the few instruments covering all stigma mechanisms affecting PLWHA.<sup>12</sup> It takes up to 25  
8  
9 75 minutes to complete the HSS-40<sup>22</sup>, which may limit its application, especially in extensive  
10  
11 76 surveys. Though shortened versions covering 25<sup>22</sup> and 32<sup>23</sup> items of the HIV stigma scale exist,  
12  
13 77 the 12-item HIV stigma scale (HSS-12)<sup>14</sup> version of the Berger HIV stigma scale was examined  
14  
15 78 in the present study as it facilitates the inclusion of HIV stigma in more extensive surveys.  
16  
17 79 Furthermore, it has comparable psychometric properties to the full-length scale.<sup>14</sup> While  
18  
19 80 evidence from other parts of the world<sup>14</sup> indicates that the HSS-12 is psychometrically sound,  
20  
21 81 we are unaware of any study that has reported this scales' psychometric properties in the SSA  
22  
23 82 context.

23 83 Empirical evidence indicates that sociodemographic characteristics such as age,<sup>24 25</sup> gender,<sup>25-</sup>  
24  
25 84 <sup>27</sup> employment,<sup>28</sup> educational attainment,<sup>29-31</sup> and marital status,<sup>32</sup> are significantly correlated  
26  
27 85 with HIV-related stigma. However, the directionality is inconsistent. An explanation for the  
28  
29 86 different findings regarding correlates and predictors of HIV-related stigma might be due to  
30  
31 87 the diverse research strategies applied and the sample composition. Research shows that stigma  
32  
33 88 and disclosure of HIV status are interrelated phenomena for people living with HIV/AIDS.<sup>33</sup>  
34  
35 89 Furthermore, persons who have not disclosed their HIV status exhibit higher levels of  
36  
37 90 perceived HIV-related stigma and greater levels of concern about HIV disclosure.<sup>34</sup>

37 91 Despite the abundance of published reports on HIV-related stigma and its predictors amongst  
38  
39 92 specific sub-groups of the adult population, there is a paucity of research findings focusing on  
40  
41 93 predictors of HIV-related stigma across the entire adult population. Further, no study in the  
42  
43 94 SSA context has tested for the validity and reliability of the HSS-12. This study aims to  
44  
45 95 determine the correlates of HIV-related stigma among adults living with HIV from Kilifi,  
46  
47 96 Coastal Kenya. Specifically, the study aims to: i) examine the psychometric properties of the  
48  
49 97 12-item Berger Stigma Scale; and ii) establish the correlates of stigma among adults living with  
50  
51 98 HIV in Kilifi.

## 52 99 **Methods**

### 54 100 **Study setting**

56  
57 101 This cross-sectional study was conducted at the Kenya Medical Research Institute-Wellcome  
58  
59 102 Trust Research Programme (KEMRI-WTRP), Centre for Geographic Medicine  
60

1  
2  
3 103 Research(Coast), Kilifi, Kenya. It was based at the Comprehensive Care and Research Centre  
4 (CCRC) in the Kilifi County Hospital (KCH). The majority of Kilifi County residents are poor  
5 104 (71.4% live below the poverty line), lack formal education, and earn a living mainly through  
6 105 subsistence farming or fishing.<sup>35-37</sup> HIV prevalence in adults is estimated to be at 4.5%.<sup>38</sup> The  
7 106 CCRC offers clinical services such as management of opportunistic infections, HIV testing and  
8 107 counselling, family planning, nutritional counselling, cervical cancer screening, the  
9 108 dispensation of antiretroviral therapy (ART), and serves as a research facility. About 60  
10 109 patients are seen daily. By 2020, the clinic has enrolled over 9,000 patients of all ages.  
11 110

### 111 **Study participants**

112 This data is part of a larger project focusing on diverse outcomes in adults living with HIV,  
113 including mental health and health-related quality of life. A cross-sectional survey of 450 study  
114 participants among patients attending an HIV care and treatment clinic at Kilifi County  
115 Hospital was conducted between February and April 2018 (Figure 1). The participation criteria  
116 were age (18-60 years old) with confirmed HIV positive status, on combination antiretroviral  
117 therapy, and informed consent to participate. Participants with an acute medical illness or  
118 cognitive difficulties at the time of enrolment/administration of questionnaire or could not  
119 understand and/or communicate in the national language (Kiswahili), which was used during  
120 the administration of all study instruments, were excluded. A research team member introduced  
121 the study to eligible participants when they visited the clinic for scheduled appointments. Those  
122 who consented to take part responded to the instruments at the clinic.  
123

### 124 **Data Collection Procedures**

125 Study data were collected and managed using REDCap electronic data capture tools hosted at  
126 KEMRI Wellcome Trust Programme<sup>39 40</sup>. REDCap (Research Electronic Data Capture) is a  
127 secure, web-based software platform designed to support data capture for research studies,  
128 providing 1) an intuitive interface for validated data capture; 2) audit trails for tracking data  
129 manipulation and export procedures; 3) automated export procedures for seamless data  
130 downloads to common statistical packages; and 4) procedures for data integration and  
131 interoperability with external sources. Data collection instruments were interviewer-  
132 administered via android tablets, in the same order, and under the same administration  
133 environment. Research assistants underwent a 4-day training in research ethics and proper  
134 interviewing techniques (with role-plays) and were familiarised with the tablet-based  
60

1  
2  
3 135 questionnaires. The questionnaire administration took place in a quiet and private room within  
4  
5 136 the CCRC in KCH, and the interview session lasted between 30 to 45 minutes.  
6  
7 137

## 8 9 138 **Measures**

10  
11 139 **HIV-related stigma:** The short version (HSS-12) of the Berger HIV stigma scale<sup>14</sup> was used  
12  
13 140 to assess patient-perceived HIV-related stigma under four dimensions: i) *personalised stigma*;  
14  
15 141 ii) *disclosure concerns*; iii) *negative self-image*; and iv) *concerns with public attitudes*, each  
16  
17 142 comprising a sub-scale of the instrument. *Personalised stigma* has been suggested to represent  
18  
19 143 the enacted stigma mechanism, *disclosure concerns*, and *concerns with public attitudes*  
20  
21 144 dimensions have been proposed to represent anticipated stigma mechanism, and *negative self-*  
22  
23 145 *image* has been proposed to represent internalised stigma mechanism.<sup>12</sup> Items on this scale are  
24  
25 146 rated from 1-4, with (1) being “strongly disagree” and (4) “strongly agree.” The possible score  
26  
27 147 for each item ranges from 1 to 4 (3–12 for sub-scale), and a total score ranges between 12 and  
28  
29 148 48 and is derived from the summation of item scores. Higher scores designate a greater level  
30  
31 149 of perceived HIV-related stigma.

32  
33 150 **Patient Health Questionnaire version 9 (PHQ-9)**<sup>41</sup> was administered as a measure of  
34  
35 151 depressive symptoms. The PHQ-9 is a nine-item scale rated on a Likert-type scale ranging  
36  
37 152 from 0 “not at all” to 3 “nearly every day.” Item scores are summated to derive a total score  
38  
39 153 ranging from 0 to 27. It has previously been found to have good internal consistency (Cronbach  
40  
41 154 alpha 0.78) and acceptable test-retest reliability (intraclass correlation coefficient [ICC]=0.59)  
42  
43 155 when used among adults living with HIV infection in Kenya.<sup>42</sup>

44  
45 156 **Generalised Anxiety Disorder (GAD-7)**<sup>43</sup> was administered as a clinical measure for  
46  
47 157 assessing generalised anxiety disorder based on DSM-IV criteria. The GAD-7 is a seven-item  
48  
49 158 self-report instrument rated on a Likert-type scale ranging from 0 “not at all” to 3 “nearly every  
50  
51 159 day.” The scale score ranges from 0 to 21. There is evidence in support of the reliability and  
52  
53 160 validity of this scale in Kenya.<sup>44</sup> Scores from PHQ-9 and GAD-7 were combined to generate a  
54  
55 161 variable called CMD (symptoms of common mental disorders) comorbidity, indicating the co-  
56  
57 162 occurrence of depressive and anxiety symptoms.

58  
59 163 **Sociodemographic and asset index items:** A sociodemographic questionnaire was used to  
60  
164 collect information on the participants’ age, gender, relationship status, educational level,  
165 employment status, and whom they currently shared a residence. Furthermore, an asset index  
166 previously used in this setting<sup>45</sup> was used to collect information about participants’ socio-

1  
2  
3 167 economic status (SES) based on disposable assets owned. Participants were asked for  
4  
5 168 ownership of disposable items such as radio, television, refrigerator, gas, bicycle, motorcycle,  
6  
7 169 and car. The final SES score had seven (7) items. A total asset score is calculated, and  
8  
9 170 higher scores indicate a better SES. The maximum possible score for the asset index score  
10  
11 171 was 7. An asset index to estimate family wealth has been recommended as an alternative  
12  
13 172 approach to estimating SES in settings where reliable data on family income may not be  
14  
15 173 available.<sup>46</sup>

16 174 **Clinical information:** Participants' data were extracted from the clinic's medical record  
17  
18 175 database and filled into a clinical record form. This information included participants' dates of  
19  
20 176 HIV-diagnosis, combination antiretroviral therapy initiation, most current combination  
21  
22 177 antiretroviral therapy regimen, cluster of differentiation 4 (CD4) cell count, viral load (within  
23  
24 178 the last one year), recent height and weight (for Body Mass Index (BMI) calculation), and data  
25  
26 179 on World Health Organization (WHO) clinical staging. Participants' clinical information was  
27  
28 180 retrieved from their clinical records after consent was granted. Patient-unique clinic numbers  
29  
30 181 were used to access participants' medical records. We report substantial missing participant  
31  
32 182 data on viral load from the database (n = 145) with no follow-up record of CD4 cell count for  
33  
34 183 all study participants.

#### 34 184 **Instrument translation and cross-cultural adaptation**

35  
36 185 The English version of the HSS-12 was forward translated by two independent bilingual  
37  
38 186 translators to Kiswahili and back-translated into English by two independent back translators  
39  
40 187 (oblivious of the original version). A group of Kenyan HIV researchers bilingual and fluent in  
41  
42 188 both Kiswahili and English and the translators had a harmonisation meeting to review the  
43  
44 189 content, conceptual, semantic, and idiomatic equivalence of the questionnaires to ensure the  
45  
46 190 cultural relevance of the HSS-12. Before conducting the formal phase of the study, fifteen  
47  
48 191 pretest interviews were conducted to assess instrumentation rigour and develop measures to  
49  
50 192 address any limitations or threats to bias and management procedures. The final version of the  
51  
52 193 questionnaire was obtained after the incorporation of changes emerging from pretesting.  
53  
54 194 Pretesting procedures have been elaborated further elsewhere.<sup>47</sup>

55 195

#### 55 196 **Patient and public involvement**

56  
57 197 Patients were not involved in the design and conduct of this study.

58  
59 198

## 199 **Statistical analyses**

### 200 **Factor structure and measurement invariance across age-groups and gender**

201 First, Confirmatory Factor Analysis (CFA) was used to examine the HIV-stigma scale's factor  
202 structure. A CFA model representing the Swahili version of the HSS-12 was set up and  
203 analysed with weighted least square mean and variance adjusted (WLSMV) using the lavaan<sup>48</sup>  
204 package in R statistical software<sup>49</sup> on all the 450 observations. The Goodness of fit was  
205 assessed using the  $\chi^2$  test, Comparative Fit Index (CFI), Tucker Lewis Index (TLI), and root  
206 mean square error of approximation (RMSEA). The data was expected to have a good fit to the  
207 model if the  $\chi^2$  test was non-significant, CFI and TLI values were greater than 0.90, and  
208 RMSEA score was lower than 0.05.<sup>50</sup>

209 Secondly, after defining the model, Multi-Group Confirmatory Factor Analysis (MGCFAs)<sup>51</sup>  
210 was used to test for measurement invariance of the HSS-12 for gender and age groups. Change  
211 in CFI ( $\Delta$ CFI) has been suggested as a robust statistic for testing the between-group invariance  
212 of CFA models. Additionally, it has been recommended that invariance can be assumed when  
213  $\Delta$ CFI is  $\leq 0.01$  in absolute values.<sup>52</sup>

### 214 **Internal construct validity and convergent validity**

215 Means and standard deviations were used to evaluate the distribution of scores within the  
216 subscale and among the items. Itemised means and standard deviations were expected to be  
217 almost the same within the subscale, justifying item scores' aggregation into subscale scores.<sup>53</sup>  
218 The item-total correlation was used to evaluate internal construct validity. Each items'  
219 corrected item-total correlation coefficients were calculated and expected to exceed 0.4 and  
220 vary in range. Convergent validity was assessed using the Pearson correlation coefficient  
221 between HSS-12, PHQ-9, and GAD-7 scores. Correlation coefficients were interpreted as small  
222 (0.10–0.29), moderate (0.30–0.49), and large (0.49 and above).<sup>54</sup>

### 223 **Reliability**

224 Cronbach's alpha and ordinal alpha were used to examine each subscale's internal consistency  
225 and overall scores of the Swahili version of the HSS-12. Cronbach's alpha was considered  
226 acceptable if greater than ( $>0.7$ ).<sup>55</sup> The intra-class correlation coefficient (ICC) was used to  
227 examine test-retest of the Swahili version of the HSS-12 by correlating scores taken at two  
228 different time points (2 weeks apart)<sup>56</sup> using the same measure administered to the same  
229 participant. ICC of 0.60 was considered marginal, 0.70 acceptable, and anything over 0.80  
230 considered high.<sup>57</sup>



## 231 **Sample characteristics and correlates**

232 Frequencies and means (with percentages and standard deviations) were used to describe  
233 sample characteristics. Univariate and multivariable linear regression were used to assess  
234 factors associated with both stigma subscales and the overall stigma scale. In the regression  
235 model, stigma scores were expressed as a continuous measure. Independent variables included  
236 age, gender, marital status, education level, employment status, socioeconomic status (SES),  
237 body mass index (BMI), viral load, WHO clinical stages, months since HIV diagnosis, months  
238 since cART initiation, HIV status disclosure, self-reported opportunistic infections, and the co-  
239 occurrence of depressive and anxiety symptoms. Our review of the literature informed factors  
240 included in the model. All variables with  $p < 0.20$  were included in the multivariable regression  
241 model apart from viral load because participants had missing values ( $n = 145$ ). The final  
242 multivariable models were generated using a backward stepwise approach by eliminating all  
243 variables independently with  $p > 0.05$ . Assumptions of linear regression testing were visually  
244 inspected through histograms (linearity), normal probability plots (normality), and plots of  
245 residual versus predicted values (homoscedasticity). Multicollinearity was assessed using the  
246 variance inflation factor (VIF). There were no multicollinearity problems. Modelling was  
247 undertaken five times in total: once to predict overall stigma and once to predict each of the  
248 four subscales. R (version 4.0.2) statistical software package<sup>49</sup> was used to explore the  
249 construct validity of the HSS-12. All other analyses were run using (Stata version 14.0)  
250 statistical software package.<sup>58</sup>

## 251 **Results**

### 252 **Sample Characteristics**

253 The 450 participants had a median age of 43 years (IQR = 36-50), ranging from 18 to 60 years.  
254 The vast majority of the sample were female (79.1%), had attained basic primary level  
255 education (53.1%), lived with a family member (82.4%), and were unemployed (59.8%). Less  
256 than half of the study participants (43.8%) were separated, divorced, or widowed. The mean  
257 BMI was within the normal range (mean [SD] = 22.4 [4.8]). Most study participants had  
258 disclosed their HIV status to others (94.0%). The median time since HIV diagnosis was 8.8  
259 years (IQR = 4.67-11.50), ranging from 0 to 18 years. A total of 417 (93.7%) were in stage 1 of  
260 the WHO clinical staging, and 425 (95.3%) were on the first-line cART regimen (Table 1). The  
261 median time elapsed since cART initiation was 6.7 years (IQR = 3.67-10.00). At the time of  
262 the interview, less than a fifth (18.4%) of the study participants had an opportunistic infection.



1  
2  
3 263 Perceived overall stigma scores ranged from 12 to 48, with a median score of 28 (IQR = 23-  
4 264 33). Using PHQ-9 and GAD-7 cut-off score of  $\geq 10$ , which has been shown to maximise  
5 265 specificity and sensitivity for depression<sup>59</sup> and general anxiety disorder<sup>43</sup> screening, the overall  
6 266 prevalence of depression and anxiety was 13.8% and 5.3%, respectively, among enrolled  
7 267 participants. The co-occurrence of depressive and anxiety symptoms was present in 4.7% of  
8 268 the study participants.

### 14 269 **Factor structure and measurement invariance across age groups and gender**

16 270 Supplementary Supplementary Figure 1 presents CFA results with standardised correlation  
17 271 coefficients. Our hypothesised model that the overall stigma scale comprises four sub-scales  
18 272 correlated was confirmed given the observed fit indexes. The  $\chi^2$  test was statistically significant  
19 273 ( $\chi^2 = 91.982$ ,  $df = 50$ ,  $p = 0.000$ ) but alternate fit measures indicated acceptable fit; RMSEA:  
20 274 0.044; CFI: 0.966 and TLI: 0.955. These results generally indicate that the data had a good fit  
21 275 to the model and that we can confidently use both total and sub-scale scores in this population.  
22 276 Measurement invariance across age groups and gender was supported because  $\Delta$ CFIs are lower  
23 277 than 0.01 in all models suggesting that measurement invariance can be assumed.

### 31 278 **Internal construct validity and convergent validity**

33 279 The factor loading of all items on the hypothesised scale was good except for item 6 (0.21)  
34 280 under the disclosure concern subscale. Convergent validity of the HSS-12 was demonstrated  
35 281 by the small to moderate correlations between HSS-12 and the correlation with the following  
36 282 relevant measures: GAD-7 ( $r = 0.368$ ,  $p < 0.001$ ) and PHQ-9 ( $r = 0.328$ ,  $p < 0.001$ ) Table 2.

### 41 283 **Reliability: Internal consistency and test-retest**

43 284 Cronbach's alpha ( $\alpha$ ) for the subscales and overall scale were all  $> 0.7$  (see Table 2) except for  
44 285 the disclosure concern sub-scale, which was 0.53 (95%CI: 0.46, 0.60). Additionally, ordinal  $\alpha$   
45 286 for the subscales ranged from 0.65-0.91. The test-retest reliability of the short 12-item version  
46 287 of the HIV stigma scale was excellent, 0.92 (95%CI: 0.87, 0.95). Additionally, Table 2 presents  
47 288 descriptive statistics for the stigma scale on the item level and subscale level. Corrected item-  
48 289 total correlation coefficients were  $> 0.4$  for all the items apart from one item (0.21) in the  
49 290 disclosure concerns subscale. A variation of 0.46-0.88 indicates that the intended stigma  
50 291 concepts' broadness had been captured.

## 292 **Correlates of perceived HIV-related stigma**

293 Table 3 and Table 4 present results based on univariate and multivariable regression analyses,  
294 respectively. In the univariate model, it was found that being female, being separated, divorced  
295 or widowed, having primary or no level of education, being self-employed or unemployed,  
296 having a low asset index score, having a viral load of >1000 copies/ml, decreased duration  
297 since HIV diagnosis, decreased duration since cART initiation, HIV status non-disclosure,  
298 having any current opportunistic infection and co-occurrence of depression and anxiety  
299 symptoms were significantly associated with overall HIV stigma scores.

300 *Personalised stigma* was significantly associated with being female, being single, separated,  
301 divorced or widowed, self-employed or unemployed, having a low asset index score, having a  
302 viral load of >1000 copies/ml, having any current opportunistic infection, and the co-  
303 occurrence of depressive and anxiety symptoms. *Disclosure concern* was significantly  
304 associated with being separated, divorced or widowed, having no level of education, having a  
305 low asset index score, less time elapsed since HIV diagnosis, less time elapsed since cART  
306 initiation, and HIV status non-disclosure. *Concern with public attitudes* was significantly  
307 associated with being female, having primary or no level of education, decreased duration since  
308 cART initiation, and the co-occurrence of depressive and anxiety symptoms. *Negative self-*  
309 *image* was significantly associated with being separated, widowed or divorced, having no level  
310 of education, being self-employed or unemployed, having a viral load of >1000 copies/ml,  
311 decreased duration since HIV diagnosis, decreased duration since cART initiation, having any  
312 current opportunistic infection and the co-occurrence of depressive and anxiety symptoms.

313 When a multiple linear regression model was run, it was found that being female ( $\beta=2.001$ ,  
314  $95\%CI: 0.21, 3.80$ ,  $p=0.029$ ), HIV status disclosure ( $\beta=4.237$ ,  $95\%CI: 1.27, 7.20$ ,  $p=0.005$ )  
315 and co-occurrence of depressive and anxiety symptoms ( $\beta=6.670$ ,  $95\%CI: 3.40, 9.94$ ,  $p<0.001$ )  
316 were significant predictors of perceived HIV stigma. Having no education was associated with  
317 increasing stigma levels at  $p=0.051$  ( $\beta=3.318$ ,  $95\%CI: -.01, 6.65$ ). Regression results indicated  
318 that the model explained 10.2% of the variance and that the model was a significant predictor  
319 of perceived HIV stigma  $F(6, 395) = 7.46$ ,  $p<.001$ ).

320 Concerning the four subscales, we found that *personalised stigma* was positively correlated  
321 with being female and the co-occurrence of depressive and anxiety symptoms. *Disclosure*  
322 *concern* was inversely correlated with duration since HIV diagnosis and positively correlated  
323 with having no level of education and HIV status non-disclosure. *Concerns with public*

1  
2  
3 324 *attitudes* were positively correlated with being female. *Negative self-image* was positively  
4  
5 325 correlated with having no level of education and the co-occurrence of depressive and anxiety  
6  
7 326 symptoms.

## 9 327 **Discussion**

11 328 This cross-sectional analysis of data from adults living with HIV observed that the HSS-12  
12  
13 329 presents excellent psychometric properties. Additionally, we observed that stigma was  
14  
15 330 associated with both physical and mental well-being. According to our study, correlates of  
16  
17 331 HIV-related stigma include being female, HIV status non-disclosure, and the co-occurrence of  
18  
19 332 depressive and anxiety symptoms.

### 21 333 **Factor structure, measurement invariance, validity and reliability of the short 12-item** 22 23 334 **Swahili version of the HIV Stigma Scale**

24 335 The study examined the stigma scale's psychometric properties to assess its usefulness and  
25  
26 336 describe the correlates of HIV-related stigma among adults living with HIV in Kilifi.  
27  
28 337 Reliability and validity were acceptable, and confirmatory factor analysis supported the four-  
29  
30 338 factor solution measuring the four dimensions of HIV stigma. Cronbach's alpha for the HSS-  
31  
32 339 12 among the Kenyan population is similar to the Swedish population in which the scale was  
33  
34 340 developed.<sup>14</sup> Although Cronbach's alpha for the adapted HSS-12 sub-scales was slightly lower  
35  
36 341 (0.53-0.84) than the initial version of HSS-12 (0.80-0.88), its' alpha for the total scale was 0.80  
37  
38 342 suggesting good internal consistency. Furthermore, the adapted HSS-12 had an ordinal alpha  
39  
40 343 of 0.86. The difference between ordinal alpha and Cronbach's alpha values could be attributed  
41  
42 344 to high skewness and kurtosis values for some of the questionnaire's questions, influencing  
43  
44 345 Cronbach's alpha estimate values.<sup>60 61</sup>

44 346 Measurement invariance of the Swahili HSS-12 was evaluated and confirmed across main  
45  
46 347 interest groups: gender and age. Our results indicated that the measurement model of the  
47  
48 348 Swahili HSS-12 as a patient-reported outcome to measure perceived HIV stigma among adults  
49  
50 349 is comparable across age groups and gender (Table 5).

51 350 Test-retest reliability, an indicator of scale stability over time, was of acceptable levels. The  
52  
53 351 original HSS-40 has been used in diverse settings<sup>13 62</sup> among adults 18 years and above,  
54  
55 352 reporting a test re-test reliability between (ICC=0.89-0.92). To the best of our knowledge, no  
56  
57 353 study has reported the test re-test reliability of the HSS-12.

1  
2  
3 354 We examined the construct validity of the scale using CFA since its hypothesised structure has  
4  
5 355 been published.<sup>14</sup> Our results indicated that the hypothesised model fit the data well and was  
6  
7 356 almost similar to what was reported by a study conducted in Sweden.<sup>14</sup> These results indicate  
8  
9 357 that one can use both the total scores and the subscale scores and interpret the results in  
10  
11 358 confidence, knowing that the items fit well together. HSS-12 evidenced convergent validity by  
12  
13 359 being correlated with PHQ-9, a measure of depression, and GAD-7, a measure of anxiety in  
14  
15 360 conventional ways.

16 361 The HSS-12 was reliable and valid for detecting stigma among adults living with HIV at the  
17  
18 362 Kenyan Coast. Consequently, HSS-12 can be practically used as a brief screening tool for  
19  
20 363 stigma-related problems both for research and clinical purposes. Future research could examine  
21  
22 364 its predictive validity and evaluate its sensitivity to changes. This information would be crucial  
23  
24 365 in determining its usefulness as an evaluation tool for programmes and interventions.

### 25 366 **Correlates of Stigma**

26  
27 367 Being female was positively associated with increased perceived HIV-related stigma scores,  
28  
29 368 *personalised stigma*, and *concern with public attitudes*. This finding agrees with previous  
30  
31 369 studies from SSA<sup>63</sup> and outside<sup>64 28</sup> that reported a positive association between female gender  
32  
33 370 and perceived HIV-related stigma. Research shows that females are more likely to suffer from  
34  
35 371 stigma in patriarchal societies like Kenya than males.<sup>65 66</sup> Research has established that the  
36  
37 372 African society is less tolerant of females living with HIV than males living with HIV.<sup>67 68</sup> Due  
38  
39 373 to women's subordinate status in society, they are often stigmatised as vectors of  
40  
41 374 transmission.<sup>69</sup> Furthermore, the common belief that HIV is caused by indecent sexual  
42  
43 375 behaviour has worse societal consequences for women who are expected to be monogamous,  
44  
45 376 unlike men in most African societies.<sup>67</sup> Women are often blamed counterfactually to be  
46  
47 377 responsible for HIV transmission.<sup>67</sup> Similar processes can be assumed to be at work in the  
48  
49 378 Kenyan coastal region.

50  
51 379 HIV status disclosure was positively associated with overall HIV-related stigma scores and  
52  
53 380 *disclosure concerns*, with persons who had not disclosed their HIV status reporting greater  
54  
55 381 levels of concern about HIV disclosure concerns. Anakwa and colleagues found that PLWHA  
56  
57 382 with higher levels of perceived HIV-related stigma reported greater levels of HIV disclosure  
58  
59 383 concerns; therefore, they are less likely to disclose their status.<sup>34</sup> From our study, only 6% had  
60  
384 not disclosed their status to anyone. HIV status non-disclosure might be a protective behaviour  
385 for PLWHA to conceal their status, evade adverse reactions towards themselves, weigh other

1  
2  
3 386 people's reactions, and as a sign of concern about the implication of their disclosure on their  
4  
5 387 disclosure targets.<sup>70 71</sup> Furthermore, disclosure entails deciding how and to whom to disclose  
6  
7 388 and identifying appropriate opportunities to disclose or devising means to conceal ones' status  
8  
9 389 and/or medication in order to improve access and adherence to their treatment regimen.

10  
11 390 The co-occurrence of depressive and anxiety symptoms was positively correlated with overall  
12  
13 391 HIV-related stigma scores, *personalised stigma*, and *negative self-image*. This finding  
14  
15 392 corroborates previous studies among PLWHA carried out within SSA,<sup>30 72, 26</sup> and outside,<sup>73 74</sup>  
16  
17 393 which have invariably found a significant association between HIV-related stigma and  
18  
19 394 depressive symptoms. Liu and colleagues<sup>75</sup> reported that the more stigma PLWHA perceived,  
20  
21 395 the more anxiety they experienced. Similarly, we report that HIV-related stigma is significantly  
22  
23 396 associated with the co-occurrence of depressive and anxiety symptoms. Additionally, an  
24  
25 397 individual's perception of themselves in light of their diagnosis appears to trigger depression.<sup>76</sup>  
26  
27 398 Screening for depression, anxiety, and HIV-related stigma might provide insights on  
28  
29 399 interventions that may promote a positive attitude and self-image, thereby reducing depression,  
30  
31 400 anxiety, and stigma, leading to psychological and physical well-being. Given the cross-  
32  
33 401 sectional nature of the study, we cannot claim causality. However, the association between co-  
34  
35 402 occurrence of depressive and anxiety symptoms and stigma provides the impetus for: a)  
36  
37 403 longitudinal studies to elucidate causal pathways; and b) targeted interventions to address both  
38  
39 404 stigma and mental health to improve health outcomes of adults living with HIV.

40  
41 405 Other factors influencing the four subscales were also established. Having no level of education  
42  
43 406 was positively associated with higher reported *disclosure concerns* and *negative self-image*,  
44  
45 407 corroborating findings of studies carried out in Nigeria<sup>77</sup> and the USA.<sup>78</sup> Lower levels of  
46  
47 408 education may lead to less exposure, lack of or little knowledge about HIV infection and  
48  
49 409 transmission. In contrast, higher levels of education might lead to higher levels of knowledge,  
50  
51 410 providing exposure to new ways of thinking and new sources of information about the HIV  
52  
53 411 pandemic resulting in the reduction of less supportive attitudes towards PLWHA.<sup>79 80</sup> Previous  
54  
55 412 research has demonstrated that people with high levels of knowledge of the transmission routes  
56  
57 413 for HIV consistently had more supportive attitudes towards those with HIV demonstrating the  
58  
59 414 role that knowledge has in reducing the misconceptions that act to create fear and shape  
60  
415 stigma.<sup>79</sup>

416  
417  
418  
419  
420  
421  
422  
423  
424  
425  
426  
427  
428  
429  
430  
431  
432  
433  
434  
435  
436  
437  
438  
439  
440  
441  
442  
443  
444  
445  
446  
447  
448  
449  
450  
451  
452  
453  
454  
455  
456  
457  
458  
459  
460  
461  
462  
463  
464  
465  
466  
467  
468  
469  
470  
471  
472  
473  
474  
475  
476  
477  
478  
479  
480  
481  
482  
483  
484  
485  
486  
487  
488  
489  
490  
491  
492  
493  
494  
495  
496  
497  
498  
499  
500  
501  
502  
503  
504  
505  
506  
507  
508  
509  
510  
511  
512  
513  
514  
515  
516  
517  
518  
519  
520  
521  
522  
523  
524  
525  
526  
527  
528  
529  
530  
531  
532  
533  
534  
535  
536  
537  
538  
539  
540  
541  
542  
543  
544  
545  
546  
547  
548  
549  
550  
551  
552  
553  
554  
555  
556  
557  
558  
559  
560  
561  
562  
563  
564  
565  
566  
567  
568  
569  
570  
571  
572  
573  
574  
575  
576  
577  
578  
579  
580  
581  
582  
583  
584  
585  
586  
587  
588  
589  
590  
591  
592  
593  
594  
595  
596  
597  
598  
599  
600  
601  
602  
603  
604  
605  
606  
607  
608  
609  
610  
611  
612  
613  
614  
615  
616  
617  
618  
619  
620  
621  
622  
623  
624  
625  
626  
627  
628  
629  
630  
631  
632  
633  
634  
635  
636  
637  
638  
639  
640  
641  
642  
643  
644  
645  
646  
647  
648  
649  
650  
651  
652  
653  
654  
655  
656  
657  
658  
659  
660  
661  
662  
663  
664  
665  
666  
667  
668  
669  
670  
671  
672  
673  
674  
675  
676  
677  
678  
679  
680  
681  
682  
683  
684  
685  
686  
687  
688  
689  
690  
691  
692  
693  
694  
695  
696  
697  
698  
699  
700  
701  
702  
703  
704  
705  
706  
707  
708  
709  
710  
711  
712  
713  
714  
715  
716  
717  
718  
719  
720  
721  
722  
723  
724  
725  
726  
727  
728  
729  
730  
731  
732  
733  
734  
735  
736  
737  
738  
739  
740  
741  
742  
743  
744  
745  
746  
747  
748  
749  
750  
751  
752  
753  
754  
755  
756  
757  
758  
759  
760  
761  
762  
763  
764  
765  
766  
767  
768  
769  
770  
771  
772  
773  
774  
775  
776  
777  
778  
779  
780  
781  
782  
783  
784  
785  
786  
787  
788  
789  
790  
791  
792  
793  
794  
795  
796  
797  
798  
799  
800  
801  
802  
803  
804  
805  
806  
807  
808  
809  
810  
811  
812  
813  
814  
815  
816  
817  
818  
819  
820  
821  
822  
823  
824  
825  
826  
827  
828  
829  
830  
831  
832  
833  
834  
835  
836  
837  
838  
839  
840  
841  
842  
843  
844  
845  
846  
847  
848  
849  
850  
851  
852  
853  
854  
855  
856  
857  
858  
859  
860  
861  
862  
863  
864  
865  
866  
867  
868  
869  
870  
871  
872  
873  
874  
875  
876  
877  
878  
879  
880  
881  
882  
883  
884  
885  
886  
887  
888  
889  
890  
891  
892  
893  
894  
895  
896  
897  
898  
899  
900  
901  
902  
903  
904  
905  
906  
907  
908  
909  
910  
911  
912  
913  
914  
915  
916  
917  
918  
919  
920  
921  
922  
923  
924  
925  
926  
927  
928  
929  
930  
931  
932  
933  
934  
935  
936  
937  
938  
939  
940  
941  
942  
943  
944  
945  
946  
947  
948  
949  
950  
951  
952  
953  
954  
955  
956  
957  
958  
959  
960  
961  
962  
963  
964  
965  
966  
967  
968  
969  
970  
971  
972  
973  
974  
975  
976  
977  
978  
979  
980  
981  
982  
983  
984  
985  
986  
987  
988  
989  
990  
991  
992  
993  
994  
995  
996  
997  
998  
999  
1000

416 Months since HIV diagnosis was inversely associated with *disclosure concerns*, with persons  
417 with a more recent diagnosis reporting greater levels of concern about HIV status disclosure.

1  
2  
3 418 This is consistent with a study of people living with HIV/AIDS (PLWHA) in China<sup>81</sup> and  
4  
5 419 among African Americans.<sup>78</sup> This finding suggests that living longer with HIV is associated  
6  
7 420 with positive outcomes because PLWHA are likely to adjust over time to their HIV positive  
8  
9 421 status, receive more information, develop greater insights and understanding of the disease and  
10  
11 422 establish psychological mechanisms to better cope with HIV stigma leading to lower levels of  
12  
13 423 perceived HIV stigma.

#### 14 424 **Strengths and limitations of this study**

15  
16 425 A potential strength is that this is the first study to report the measurement characteristics of  
17  
18 426 the 12-item HIV stigma scale in the SSA context. We recognise several potential limitations in  
19  
20 427 this study. First, the study was in a clinical setting where our study sample consisted of adults  
21  
22 428 living with HIV on cART. Compared to untreated individuals living with HIV, it is likely that  
23  
24 429 levels of HIV stigma would be lower in our sample because it has been shown that access to  
25  
26 430 ART lowers stigma.<sup>82-84</sup> Second, this study is cross-sectional, so causality for the observed  
27  
28 431 significant associations cannot be inferred. We can also not conclude how individuals may  
29  
30 432 experience stigma over time because of the study design limitation. Third, findings may not be  
31  
32 433 generalisable to all adults living with HIV in Kenya as data were collected from one  
33  
34 434 geographical setting and excluded adults older than 60 years. Fourth, because many  
35  
36 435 participants (n = 145) lacked information on their most recent viral load and none had follow-  
37  
38 436 up data on CD4 counts, these variables were excluded from the regression analyses. A  
39  
40 437 disproportionately large number of patients, combined with financial constraints, may explain  
41  
42 438 why these tests are not routinely performed. Future studies, particularly those from resource-  
43  
44 439 constrained settings, should budget for these tests because these biological factors have been  
45  
46 440 associated with HIV-related stigma.<sup>85</sup> Finally, the psychometric robustness of the disclosure  
47  
48 441 concern sub-scale may be limited. We recommend further research into investigating this  
49  
50 442 specific subscale.

#### 51 443 **Conclusions and implications**

52  
53 444 From the study, the 12-item short version of the Berger HIV stigma scale<sup>14</sup> had good  
54  
55 445 psychometric properties and can be recommended for research purposes. The current study  
56  
57 446 suggests that women, those who have not disclosed, and those experiencing co-occurring  
58  
59 447 depressive and anxiety symptoms experience a higher level of perceived HIV stigma in Coastal  
60  
448 Kenya. This finding is useful in designing future interventions to improve the quality of life of  
449  
450 449 people living with HIV/AIDS. We propose interventions that need to take into account gender



1  
2  
3 450 to address the specific needs of women, people who have not disclosed their HIV status, and  
4  
5 451 those exhibiting symptoms of depression and anxiety, thereby improving their quality of life.  
6  
7 452 All these interventions will help in bettering both the physical and mental well-being of adults  
8  
9 453 living with HIV. Additionally, it would be prudent to investigate further the association  
10  
11 454 between lower education and HIV-related stigma as we found a marginal association.  
12

### 13 455 **Acknowledgements**

14  
15 456 We thank our participants for taking the time and effort to participate in this study and the  
16  
17 457 Comprehensive Care and Research Centre (CCRC) staff in the Kilifi County Hospital HIV care  
18  
19 458 and treatment clinic for their unrelenting support. We appreciate Patrick Katana Vidzo for  
20  
21 459 helping with the entry of clinical data. The authors acknowledge the Kenya Medical Research  
22  
23 460 Institute (KEMRI) Director for permission to publish this work.  
24

### 25 461 **Footnotes**

26  
27 462 *Author Contributions:* SWW, CN, and AA conceptualised the study. SWW, MKN and AA  
28  
29 463 designed the study. PM formulated study questions for tablet administration and managed the  
30  
31 464 data. SWW and MKN supervised data collection. SWW, MKN, and AM participated in data  
32  
33 465 collection. SWW and MKN analysed the data. SWW, MKN, PM, AM, SL, CN and AA  
34  
35 466 contributed to interpreting the data. SWW wrote the first draft of the manuscript. All authors  
36  
37 467 reviewed subsequent versions of the manuscript and approved the final version for submission.  
38  
39 468 The corresponding author affirms that all listed authors meet authorship criteria and that no  
40  
41 469 other author meeting the criteria has been omitted.  
42

43 471 *Funding:* This work was supported by funding from the Medical Research Council (Grant  
44  
45 472 number MR/M025454/1) to AA. This award is jointly funded by the UK Medical Research  
46  
47 473 Council (MRC) and the UK Department for International Development (DFID) under the  
48  
49 474 MRC/DFID concordant agreement and is also part of the EDCTP2 program supported by the  
50  
51 475 European Union.  
52

53 477 *Disclaimer:* The funders had no role in the design, collection, analysis, interpretation and  
54  
55 478 manuscript writing.  
56

57 479

58 480 *Competing interests:* None declared.  
59  
60



1  
2  
3 481

482 *Ethical approval:* The local institutional review board, Scientific and Ethics Review Board  
483 (SERU; Ref KEMRI/SERU/CGMR-C/108/3594), granted ethical approval to recruit  
484 participants into the study. We obtained authorisation to work in the HIV care and treatment  
485 clinic from the Ministry of Health, County government of Kilifi (Ref HP/KCHS/VOL.VIX/65).  
486 Study participants provided written, informed consent to be part of the study.

13 487

488 *Transparency:* The lead author (SWW) confirms that the manuscript is an honest, accurate,  
489 and sincere account of the research being reported; no important aspects of the research have  
490 been omitted; and that explanations for any discrepancies from the research as planned (and, if  
491 relevant, registered) have been provided.

22 492

493 *Data sharing statement:* No additional data are available. Anyone interested in accessing the  
494 data reported in this article is free to write to the Data Governance Committee of the KEMRI  
495 Wellcome Trust Research Programme, review the application and advise as appropriate, and  
496 ensure that uses are compatible with the consent obtained from participants for data collection.  
497 Requests can be sent to the coordinator of the Data Governance Committee using the following  
498 email: [dgc@kemri-wellcome.org](mailto:dgc@kemri-wellcome.org).

## 499 REFERENCES

- 500 1. Joint United Nations Programme on HIV/AIDS. Global HIV & AIDS statistics — 2020  
501 fact sheet [Available from: <https://www.unaids.org/en/resources/fact-sheet> accessed  
502 22/2/2021].
- 503 2. Joint United Nations Programme on HIV/AIDS. UNAIDS DATA 2020. Switzerland:  
504 UNAIDS; 2020. Available from:  
505 [https://www.unaids.org/sites/default/files/media\\_asset/2020\\_aids-data-book\\_en.pdf](https://www.unaids.org/sites/default/files/media_asset/2020_aids-data-book_en.pdf)  
506 [Accessed 8/9/2021]
- 507 3. National AIDS Control Council (NACC). Kenya AIDS Response Progress Report 2014:  
508 Progress towards Zero. Nairobi, Kenya: National AIDS Control Council of Kenya;  
509 2014. Available from:  
510 [https://www.unaids.org/sites/default/files/country/documents/KEN\\_narrative\\_report\\_2014.pdf](https://www.unaids.org/sites/default/files/country/documents/KEN_narrative_report_2014.pdf)  
511 [Accessed 04/06/2020]
- 512 4. Goffman E. Stigma. Notes on the Management of Spoiled Identity. New York: Simon and  
513 Shuster: Inc, 1963.
- 514 5. Jones EE, Farina A, Hastorf AH, et al. Social stigma: the psychology of marked  
515 relationships. New York: W.H. Freeman 1984.
- 516 6. Maluccio JA, Wu F, Rokon RB, et al. Assessing the Impact of Food Assistance on Stigma  
517 Among People Living with HIV in Uganda Using the HIV/AIDS Stigma Instrument-  
518 PLWA (HASI-P). *Aids Behav* 2017;21(3):766-82. doi: 10.1007/s10461-016-1476-9  
519 [published Online First: 2016/07/04]
- 520 7. Dahlui M, Azahar N, Bulgiba A, et al. HIV/AIDS Related Stigma and Discrimination  
521 against PLWHA in Nigerian Population. *PLoS One* 2015;10(12):e0143749. doi:  
522 10.1371/journal.pone.0143749 [published Online First: 2015/12/15]
- 523 8. Toth S, J AY, DePinto N. HIV stigma: perceptions from HIV-positive and HIV-negative  
524 patients in a community dental clinic. *Journal of dental research, dental clinics,*  
525 *dental prospects* 2016;10(4):263-69. doi: 10.15171/joddd.2016.042 [published Online  
526 First: 2017/01/18]
- 527 9. Nyblade L, Stangl A, Weiss E, et al. Combating HIV stigma in health care settings: what  
528 works? *J Int AIDS Soc* 2009;12:15. doi: 10.1186/1758-2652-12-15 [published Online  
529 First: 2009/08/08]
- 530 10. Clark HJ, Lindner G, Armistead L, et al. Stigma, disclosure, and psychological  
531 functioning among HIV-infected and non-infected African-American women. *Women*  
532 *& health* 2004;38(4):57-71.
- 533 11. Lindberg MH, Wettergren L, Wiklander M, et al. Psychometric evaluation of the HIV  
534 stigma scale in a Swedish context. *PLoS One* 2014;9(12):e114867. doi:  
535 10.1371/journal.pone.0114867 [published Online First: 2014/12/19]
- 536 12. Earnshaw VA, Chaudoir SR. From conceptualizing to measuring HIV stigma: a review of  
537 HIV stigma mechanism measures. *Aids Behav* 2009;13(6):1160-77. doi:  
538 10.1007/s10461-009-9593-3 [published Online First: 2009/07/29]
- 539 13. Berger BE, Ferrans CE, Lashley FR. Measuring stigma in people with HIV: Psychometric  
540 assessment of the HIV stigma scale. *Research in nursing & health* 2001;24(6):518-29.  
541 doi: doi.org/10.1002/nur.10011
- 542 14. Reinius M, Wettergren L, Wiklander M, et al. Development of a 12-item short version of  
543 the HIV stigma scale. *Health and Quality of Life Outcomes* 2017;15(1):115. doi:  
544 10.1186/s12955-017-0691-z [published Online First: 2017/06/01]
- 545 15. Kingori C, Reece M, Obeng S, et al. Psychometric evaluation of a cross-culturally  
546 adapted felt stigma questionnaire among people living with HIV in Kenya. *Aids*

1  
2  
3  
4  
5  
6  
7  
8  
9  
10  
11  
12  
13  
14  
15  
16  
17  
18  
19  
20  
21  
22  
23  
24  
25  
26  
27  
28  
29  
30  
31  
32  
33  
34  
35  
36  
37  
38  
39  
40  
41  
42  
43  
44  
45  
46  
47  
48  
49  
50  
51  
52  
53  
54  
55  
56  
57  
58  
59  
60

- 547 *Patient Care St* 2013;27(8):481-8. doi: 10.1089/apc.2012.0403 [published Online  
548 First: 2013/08/24]
- 549 16. Wiklander M, Rydstrom LL, Ygge BM, et al. Psychometric properties of a short version  
550 of the HIV stigma scale, adapted for children with HIV infection. *Health Qual Life*  
551 *Outcomes* 2013;11(1):195. doi: 10.1186/1477-7525-11-195 [published Online First:  
552 2013/11/15]
- 553 17. Holzemer WL, Uys LR, Chirwa ML, et al. Validation of the HIV/AIDS Stigma  
554 Instrument—PLWA (HASI-P). 2007;19(8):1002-12.
- 555 18. Bauman L, Silver E, Camacho S Stigma among mothers with HIV/AIDS. XIII  
556 International AIDS Conference, Durban, South Africa; 2000
- 557 19. Fife BL, Wright ER. The dimensionality of stigma: a comparison of its impact on the self  
558 of persons with HIV/AIDS and cancer. *J Health Soc Behav* 2000;41(1):50-67.  
559 [published Online First: 2000/04/06]
- 560 20. Herek GM, Capitanio JP. Public reactions to AIDS in the United States: a second decade  
561 of stigma. *Am J Public Health* 1993;83(4):574-7. doi: 10.2105/ajph.83.4.574  
562 [published Online First: 1993/04/01]
- 563 21. Sowell RL, Seals BF, Moneyham L, et al. Quality of life in HIV-infected women in the  
564 south-eastern United States. *AIDS Care* 1997;9(5):501-12. doi: 10.1080/713613191  
565 [published Online First: 1997/12/24]
- 566 22. Jeyaseelan L, Kumar S, Mohanraj R, et al. Assessing HIV/AIDS stigma in South India:  
567 validation and abridgement of the Berger HIV stigma scale. 2013;17(1):434-43.
- 568 23. Bunn JY, Solomon SE, Miller C, et al. Measurement of stigma in people with HIV: a  
569 reexamination of the HIV Stigma Scale. *AIDS Educ Prev* 2007;19(3):198-208. doi:  
570 10.1521/aeap.2007.19.3.198 [published Online First: 2007/06/15]
- 571 24. Emlert CA, Brennan DJ, Brennenstuhl S, et al. The impact of HIV-related stigma on older  
572 and younger adults living with HIV disease: does age matter? *AIDS care*  
573 2015;27(4):520-28.
- 574 25. Pannetier J, Lelievre E, Le Coeur S. HIV-related stigma experiences: Understanding  
575 gender disparities in Thailand. *AIDS Care* 2016;28(2):170-8. doi:  
576 10.1080/09540121.2015.1096888 [published Online First: 2015/10/20]
- 577 26. Endeshaw M, Walson J, Rawlins S, et al. Stigma in Ethiopia: association with depressive  
578 symptoms in people with HIV. *AIDS Care* 2014;26(8):935-9. doi:  
579 10.1080/09540121.2013.869537 [published Online First: 2014/01/03]
- 580 27. Datta S, Bhattacharjee S, Sherpa PL, et al. Perceived HIV Related Stigma among Patients  
581 Attending ART Center of a Tertiary Care Center in Rural West Bengal, India. *J Clin*  
582 *Diagn Res* 2016;10(10):VC09-VC12. doi: 10.7860/JCDR/2016/21366.8669  
583 [published Online First: 2016/11/29]
- 584 28. Sorsdahl KR, Mall S, Stein DJ, et al. The prevalence and predictors of stigma amongst  
585 people living with HIV/AIDS in the Western Province. *AIDS Care* 2011;23(6):680-5.  
586 doi: 10.1080/09540121.2010.525621 [published Online First: 2011/03/02]
- 587 29. Yeo TED, Chu TH. Social-cultural factors of HIV-related stigma among the Chinese  
588 general population in Hong Kong. *AIDS Care* 2017;29(10):1255-59. doi:  
589 10.1080/09540121.2017.1282601 [published Online First: 2017/01/24]
- 590 30. Cuca YP, Onono M, Bukusi E, et al. Factors associated with pregnant women's  
591 anticipations and experiences of HIV-related stigma in rural Kenya. *AIDS Care*  
592 2012;24(9):1173-80. doi: 10.1080/09540121.2012.699669 [published Online First:  
593 2012/07/18]
- 594 31. Girma E, Gebretsadik LA, Kaufman MR, et al. Stigma against people with HIV/AIDS in  
595 rural Ethiopia, 2005 to 2011: signs and predictors of improvement. *Aids Behav*

- 1  
2  
3 596 2014;18(6):1046-53. doi: 10.1007/s10461-013-0611-0 [published Online First:  
4 597 2013/09/28]
- 5 598 32. Takada S, Weiser SD, Kumbakumba E, et al. The Dynamic Relationship Between Social  
6 599 Support and HIV-Related Stigma in Rural Uganda. *Ann Behav Med* 2014;48(1):26-  
7 600 37. doi: 10.1007/s12160-013-9576-5
- 8 601 33. Emlert CA. A comparison of HIV stigma and disclosure patterns between older and  
9 602 younger adults living with HIV/AIDS. *Aids Patient Care and Stds* 2006;20(5):350-58.  
10 603 doi: DOI 10.1089/apc.2006.20.350
- 11 604 34. Anakwa NO, Teye-Kwadjo E, Kretchy IA. Effect of HIV-Related Stigma and HIV-  
12 605 Related Stress on HIV Disclosure Concerns: a Study of HIV-Positive Persons on  
13 606 Antiretroviral Therapy at Two Urban Hospitals in Ghana. *Applied Research in*  
14 607 *Quality of Life* 2020:1-16.
- 15 608 35. Scott JA, Bauni E, Moisi JC, et al. Profile: The Kilifi Health and Demographic  
16 609 Surveillance System (KHDSS). *Int J Epidemiol* 2012;41(3):650-7. doi:  
17 610 10.1093/ije/dys062 [published Online First: 2012/05/01]
- 18 611 36. Ngugi E, Kipruto S, Samoei P. Exploring Kenya's Inequality: Pulling Apart or Pooling  
19 612 Together? Kilifi County. Nairobi, Kenya: Kenya National Bureau of Statistics  
20 613 (KNBS) and the Society for International Development (SID) 2013.
- 21 614 37. Commission on Revenue Allocation (CRA). Kenya County Fact sheets: ; 2011 [Available  
22 615 from: [http://siteresources.worldbank.org/INTAFRICA/Resources/257994-  
23 616 1335471959878/Kenya\\_County\\_Fact\\_Sheets\\_Dec2011.pdf](http://siteresources.worldbank.org/INTAFRICA/Resources/257994-1335471959878/Kenya_County_Fact_Sheets_Dec2011.pdf) accessed 22nd August  
24 617 2018.
- 25 618 38. National AIDS Control Council. Kenya HIV County Profiles - 2016: National AIDS  
26 619 Control Council; 2016 [49-52]. Available from: [http://nacc.or.ke/wp-  
27 620 content/uploads/2016/12/Kenya-HIV-County-Profiles-2016.pdf](http://nacc.or.ke/wp-content/uploads/2016/12/Kenya-HIV-County-Profiles-2016.pdf) accessed 20th August  
28 621 2018.
- 29 622 39. Harris PA, Taylor R, Minor BL, et al. The REDCap consortium: Building an international  
30 623 community of software platform partners. 2019;95:103208.
- 31 624 40. Harris PA, Taylor R, Thielke R, et al. Research electronic data capture (REDCap)—a  
32 625 metadata-driven methodology and workflow process for providing translational  
33 626 research informatics support. 2009;42(2):377-81.
- 34 627 41. Spitzer RL, Kroenke K, Williams JB. Validation and utility of a self-report version of  
35 628 PRIME-MD: the PHQ primary care study. Primary Care Evaluation of Mental  
36 629 Disorders. Patient Health Questionnaire. *JAMA* 1999;282(18):1737-44. doi:  
37 630 10.1001/jama.282.18.1737 [published Online First: 1999/11/24]
- 38 631 42. Monahan PO, Shacham E, Reece M, et al. Validity/reliability of PHQ-9 and PHQ-2  
39 632 depression scales among adults living with HIV/AIDS in western Kenya. *J Gen Intern*  
40 633 *Med* 2009;24(2):189-97. doi: 10.1007/s11606-008-0846-z [published Online First:  
41 634 2008/11/26]
- 42 635 43. Spitzer RL, Kroenke K, Williams JB, et al. A brief measure for assessing generalized  
43 636 anxiety disorder: the GAD-7. *Arch Intern Med* 2006;166(10):1092-7. doi:  
44 637 10.1001/archinte.166.10.1092 [published Online First: 2006/05/24]
- 45 638 44. Osborn TL, Venturo-Conerly KE, Wasil AR, et al. Depression and anxiety symptoms,  
46 639 social support, and demographic factors among Kenyan high school students. *Journal*  
47 640 *of Child Family Studies* 2019:1-12.
- 48 641 45. Nyongesa MK, Mwangala PN, Mwangi P, et al. Neurocognitive and mental health  
49 642 outcomes and association with quality of life among adults living with HIV: a cross-  
50 643 sectional focus on a low-literacy population from coastal Kenya. *Bmj Open*  
51 644 2018;8(9):e023914. doi: 10.1136/bmjopen-2018-023914 [published Online First:  
52 645 2018/09/19]



- 1  
2  
3 646 46. Filmer D, Pritchett LHJD. Estimating wealth effects without expenditure data—or tears:  
4 647 an application to educational enrollments in states of India. *%J Demography*  
5 648 2001;38(1):115-32.
- 6 649 47. Nyongesa MK, Mwangi P, Wanjala SW, et al. Correlates of health-related quality of life  
7 650 among adults receiving combination antiretroviral therapy in coastal Kenya. *Health*  
8 651 *quality of life outcomes* 2020;18:1-14. doi: 10.1186/s12955-020-01421-0
- 9 652 48. Rosseel Y. Lavaan: An R package for structural equation modeling and more. Version  
10 653 0.5–12 (BETA). *Journal of statistical software* 2012;48(2):1-36.
- 11 654 49. R Core Team. R: A language and environment for statistical computing. R Foundation for  
12 655 Statistical Computing. [computer program] 4.0.2 Vienna, Austria. 2020.
- 13 656 50. Blunch N. Introduction to structural equation modeling using IBM SPSS statistics and  
14 657 AMOS: Sage 2012.
- 15 658 51. Van de Schoot R, Lugtig P, Hox J. A checklist for testing measurement invariance.  
16 659 *European Journal of Developmental Psychology* 2012;9(4):486-92.
- 17 660 52. Cheung GW, Rensvold RB. Assessing extreme and acquiescence response sets in cross-  
18 661 cultural research using structural equations modeling. *Journal of cross-cultural*  
19 662 *psychology* 2000;31(2):187-212.
- 20 663 53. Ware Jr JE, Gandek B, Joce. Methods for testing data quality, scaling assumptions, and  
21 664 reliability: the IQOLA Project approach. 1998;51(11):945-52.
- 22 665 54. Cohen J. Statistical power analysis for the behavioural sciences, 2nd edn.(Hillsdale, NJ:  
23 666 L. Erlbaum Associates). 1988
- 24 667 55. Tabachnik B, Fidell L. Using multivariate statistics (6e éd.). Boston, É.-U. U: *Pearson*  
25 668 2013
- 26 669 56. Terwee CB, Bot SD, de Boer MR, et al. Quality criteria were proposed for measurement  
27 670 properties of health status questionnaires. *Journal of clinical epidemiology*  
28 671 2007;60(1):34-42. doi: 10.1016/j.jclinepi.2006.03.012
- 29 672 57. Streiner DL. A checklist for evaluating the usefulness of rating scales. *Canadian journal*  
30 673 *of psychiatry Revue canadienne de psychiatrie* 1993;38(2):140-8. doi:  
31 674 10.1177/070674379303800214 [published Online First: 1993/03/01]
- 32 675 58. StataCorp LP. Stata statistical software: release 14. [computer program] College Station,  
33 676 TX; StataCorp LP: 2015.
- 34 677 59. Akena D, Joska J, Obuku EA, et al. Sensitivity and specificity of clinician administered  
35 678 screening instruments in detecting depression among HIV-positive individuals in  
36 679 Uganda. *AIDS Care* 2013;25(10):1245-52. doi: 10.1080/09540121.2013.764385  
37 680 [published Online First: 2013/02/13]
- 38 681 60. Gadermann A, Guhn M, Zumbo B. Estimating ordinal reliability for Likert-type and  
39 682 ordinal item response data: A conceptual, empirical, and practical guide. *P Ass, Re &*  
40 683 *Evalu*, 17 (3), 1-13, 2012.
- 41 684 61. González J, Pazmiño MJRP. Cálculo e interpretación del Alfa de Cálculo e interpretación  
42 685 del Alfa de Cronbach para el caso de validación de la consistencia interna de un  
43 686 cuestionario, con dos posibles escalas tipo Likert. 2015;2(1):62-77.
- 44 687 62. Jeyaseelan L, Kumar S, Mohanraj R, et al. Assessing HIV/AIDS stigma in south India:  
45 688 validation and abridgement of the Berger HIV Stigma scale. *Aids Behav*  
46 689 2013;17(1):434-43. doi: 10.1007/s10461-011-0128-3 [published Online First:  
47 690 2012/01/17]
- 48 691 63. Nattabi B, Li J, Thompson SC, et al. Factors associated with perceived stigma among  
49 692 people living with HIV/AIDS in post-conflict northern Uganda. *AIDS Education and*  
50 693 *Prevention* 2011;23(3):193-205.

- 1  
2  
3 694 64. Swendeman D, Rotheram-Borus MJ, Comulada S, et al. Predictors of HIV-related stigma  
4 695 among young people living with HIV. *Health Psychol* 2006;25(4):501-9. doi:  
5 696 10.1037/0278-6133.25.4.501 [published Online First: 2006/07/19]  
6 697 65. Asiedu GB, Myers-Bowman KS. Gender differences in the experiences of HIV/AIDS-  
7 698 related stigma: a qualitative study in Ghana. *Health Care Women Int* 2014;35(7-  
8 699 9):703-27. doi: 10.1080/07399332.2014.895367 [published Online First: 2014/02/26]  
9 700 66. Mugoya GC, Ernst K. Gender differences in HIV-related stigma in Kenya. *AIDS Care*  
10 701 2014;26(2):206-13. doi: 10.1080/09540121.2013.808733 [published Online First:  
11 702 2013/06/26]  
12 703 67. Mbonu NC, van den Borne B, De Vries NK. Stigma of People with HIV/AIDS in Sub-  
13 704 Saharan Africa: A Literature Review. *J Trop Med* 2009;2009:145891. doi:  
14 705 10.1155/2009/145891 [published Online First: 2009/01/01]  
15 706 68. Amuyunzu-Nyamongo M, Okeng'o L, Wagura A, et al. Putting on a brave face: the  
16 707 experiences of women living with HIV and AIDS in informal settlements of Nairobi,  
17 708 Kenya. *AIDS Care* 2007;19 Suppl 1(sup1):S25-34. doi: 10.1080/09540120601114618  
18 709 [published Online First: 2007/03/17]  
19 710 69. Muyinda H, Seeley J, Pickering H, et al. Social aspects of AIDS-related stigma in rural  
20 711 Uganda. 1997;3(3):143-47.  
21 712 70. Linda P. To tell or not to tell: negotiating disclosure for people living with HIV on  
22 713 antiretroviral treatment in a South African setting. *SAHARA J* 2013;10 Suppl  
23 714 1(sup1):S17-27. doi: 10.1080/02664763.2012.755320 [published Online First:  
24 715 2013/07/17]  
25 716 71. Evangeli M, Wroe AL. HIV Disclosure Anxiety: A Systematic Review and Theoretical  
26 717 Synthesis. *Aids Behav* 2017;21(1):1-11. doi: 10.1007/s10461-016-1453-3 [published  
27 718 Online First: 2016/07/14]  
28 719 72. Nyongesa MK, Mwangi P, Wanjala SW, et al. Prevalence and correlates of depressive  
29 720 symptoms among adults living with HIV in rural Kilifi, Kenya. *BMC Psychiatry*  
30 721 2019;19(1):333. doi: 10.1186/s12888-019-2339-5 [published Online First:  
31 722 2019/11/05]  
32 723 73. Charles B, Jeyaseelan L, Pandian AK, et al. Association between stigma, depression and  
33 724 quality of life of people living with HIV/AIDS (PLHA) in South India—a community  
34 725 based cross sectional study. 2012;12(1):463.  
35 726 74. Yi S, Chhoun P, Suong S, et al. AIDS-related stigma and mental disorders among people  
36 727 living with HIV: a cross-sectional study in Cambodia. 2015;10(3):e0121461.  
37 728 75. Liu Y, Gong H, Yang G, et al. Perceived stigma, mental health and unsafe sexual  
38 729 behaviors of people living with HIV/AIDS. 2014;39(7):658-63.  
39 730 76. Onyebuchi-Iwudibia O, Brown A. HIV and depression in Eastern Nigeria: the role of  
40 731 HIV-related stigma. *AIDS Care* 2014;26(5):653-7. doi:  
41 732 10.1080/09540121.2013.844761 [published Online First: 2013/10/19]  
42 733 77. Oke OO, Akinboro AO, Olanrewaju FO, et al. Assessment of HIV-related stigma and  
43 734 determinants among people living with HIV/AIDS in Abeokuta, Nigeria: A cross-  
44 735 sectional study. *SAGE Open Medicine* 2019;7:2050312119869109.  
45 736 78. Galvan FH, Davis EM, Banks D, et al. HIV stigma and social support among African  
46 737 Americans. 2008;22(5):423-36.  
47 738 79. Stephenson R. Community factors shaping HIV-related stigma among young people in  
48 739 three African countries. *AIDS care* 2009;21(4):403-10.  
49 740 80. Cianelli R, Villlegas N, De Oliveira G, et al. Predictors of HIV enacted stigma among  
50 741 Chilean women. 2015;24(17-18):2392-401.  
51 742 81. Li Z, Morano JP, Khoshnood K, et al. HIV-related stigma among people living with  
52 743 HIV/AIDS in rural Central China. 2018;18(1):453.

- 1  
2  
3 744 82. Chan BT, Tsai AC, Siedner MJ. HIV Treatment Scale-Up and HIV-Related Stigma in  
4 745 Sub-Saharan Africa: A Longitudinal Cross-Country Analysis. *Am J Public Health*  
5 746 2015;105(8):1581-7. doi: 10.2105/AJPH.2015.302716 [published Online First:  
6 747 2015/06/13]
- 7 748 83. Wolfe WR, Weiser SD, Leiter K, et al. The impact of universal access to antiretroviral  
8 749 therapy on HIV stigma in Botswana. *Am J Public Health* 2008;98(10):1865-71. doi:  
9 750 10.2105/AJPH.2007.122044 [published Online First: 2008/08/16]
- 10 751 84. Jurgensen M, Sandoy IF, Michelo C, et al. Effects of home-based voluntary counselling  
11 752 and testing on HIV-related stigma: findings from a cluster-randomized trial in  
12 753 Zambia. *Soc Sci Med* 2013;81:18-25. doi: 10.1016/j.socscimed.2013.01.011  
13 754 [published Online First: 2013/02/21]
- 14 755 85. Kemp CG, Lipira LL, David H, et al. HIV stigma and viral load among African-American  
15 756 women receiving treatment for HIV: A longitudinal analysis. 2019;33(9):1511.  
16  
17  
18  
19 757



758 *Table 1: Participant's sociodemographic characteristics*

| Sample Characteristics                                                                                                                               | N=450      | Total sample<br>% |
|------------------------------------------------------------------------------------------------------------------------------------------------------|------------|-------------------|
| <b>Sociodemographic characteristics</b>                                                                                                              |            |                   |
| Age – years Range (18-60), Median (IQR)                                                                                                              | 43(14)     |                   |
| Gender                                                                                                                                               |            |                   |
| Female                                                                                                                                               | 356        | 79.1              |
| Male                                                                                                                                                 | 94         | 20.9              |
| Marital Status                                                                                                                                       |            |                   |
| Married/cohabiting                                                                                                                                   | 196        | 43.6              |
| Separated /Divorced/Widowed                                                                                                                          | 197        | 43.8              |
| Single/Never Married                                                                                                                                 | 57         | 12.7              |
| Education                                                                                                                                            |            |                   |
| Tertiary                                                                                                                                             | 22         | 4.9               |
| Secondary                                                                                                                                            | 66         | 14.7              |
| Primary                                                                                                                                              | 239        | 53.1              |
| None                                                                                                                                                 | 123        | 27.3              |
| Employment                                                                                                                                           |            |                   |
| Formally employed                                                                                                                                    | 53         | 11.8              |
| Self-employed                                                                                                                                        | 117        | 26.0              |
| Other                                                                                                                                                | 11         | 2.4               |
| Unemployed (including students)                                                                                                                      | 269        | 59.8              |
| Currently living with                                                                                                                                |            |                   |
| Family                                                                                                                                               | 371        | 82.4              |
| Relative/friend                                                                                                                                      | 10         | 2.2               |
| Alone                                                                                                                                                | 69         | 15.3              |
| Asset index score <sup>a</sup> – mean (SD)                                                                                                           | 1.2(1.4)   | 1.4               |
| Perceived HIV-stigma score <sup>b</sup> – mean (SD)                                                                                                  | 28.4(7.7)  | 7.7               |
| Any current chronic illness                                                                                                                          |            |                   |
| No                                                                                                                                                   | 413        | 91.8              |
| Yes                                                                                                                                                  | 37         | 8.2               |
| <b>Clinical characteristics</b>                                                                                                                      |            |                   |
| BMI – kg/m <sup>2</sup> , mean (SD), OM = 4                                                                                                          | 22.4 (4.8) |                   |
| cART regimen, OM = 4                                                                                                                                 |            |                   |
| First-line                                                                                                                                           | 425        | 95.3              |
| Second line                                                                                                                                          | 21         | 4.7               |
| Viral load, OM = 145                                                                                                                                 |            |                   |
| ≤ 1000 copies/mL                                                                                                                                     | 265        | 86.9              |
| > 1000 copies/mL                                                                                                                                     | 40         | 13.1              |
| WHO clinical stage, OM = 5                                                                                                                           |            |                   |
| Stage 1                                                                                                                                              | 417        | 93.7              |
| Stage 2                                                                                                                                              | 22         | 4.9               |
| Stage 3                                                                                                                                              | 3          | 0.7               |
| Stage 4                                                                                                                                              | 3          | 0.7               |
| Months since HIV diagnosis – Median (IQR)                                                                                                            | 106 (82)   |                   |
| Months since cART initiation – Median (IQR)                                                                                                          | 80.5 (76)  |                   |
| <b>Treatment Characteristics</b>                                                                                                                     |            |                   |
| HIV status disclosure                                                                                                                                |            |                   |
| Yes                                                                                                                                                  | 423        | 94.0              |
| No                                                                                                                                                   | 27         | 6.0               |
| Any current opportunistic infection                                                                                                                  |            |                   |
| No                                                                                                                                                   | 367        | 81.6              |
| Yes                                                                                                                                                  | 83         | 18.4              |
| Notes: OM = Observation with missing value, SD = Standard deviation, a - score range = 0 to 7, b – score range = 12 to 48, IQR = Interquartile range |            |                   |

759

Table 2: Descriptive statistics for items and subscales in the short form 12-item Swahili version of the HIV Stigma Scale

| Item                                                                                                                               | Mean item score <sup>a</sup><br>(SD) | Corrected item<br>correlation | Mean subscale<br>score <sup>b</sup> (SD) | Reliability                                     |                             | Validity |         | Construct |       |       |
|------------------------------------------------------------------------------------------------------------------------------------|--------------------------------------|-------------------------------|------------------------------------------|-------------------------------------------------|-----------------------------|----------|---------|-----------|-------|-------|
|                                                                                                                                    |                                      |                               |                                          | Internal<br>consistency<br>(Cronbach $\alpha$ ) | Test-Retest<br>(ICC)        | $\neq$   | #       | CFI       | RMSEA | TLI   |
| <b>Personalised Stigma</b>                                                                                                         |                                      |                               | 4.86(2.56)                               | 0.84 (95% CI;<br>0.81-0.86)                     | 0.83 (95% CI;<br>0.71-0.90) | 0.357**  | 0.327** |           |       |       |
| Some people stop touching me soon they know/realise I am infected with HIV/AIDS                                                    | 1.66(1.01)                           | 0.65                          |                                          |                                                 |                             |          |         |           |       |       |
| People I care for stopped calling me after knowing I suffer from AIDs.                                                             | 1.63(1.00)                           | 0.87                          |                                          |                                                 |                             |          |         |           |       |       |
| I have lost friends for telling/explaining that I have AIDs.                                                                       | 1.59(0.96)                           | 0.88                          |                                          |                                                 |                             |          |         |           |       |       |
| <b>Disclosure Concerns</b>                                                                                                         |                                      |                               | 8.74(2.37)                               | 0.53 (95% CI;<br>0.45-0.60)                     | 0.62 (95% CI;<br>0.36-0.77) | 0.070    | 0.070   |           |       |       |
| Telling someone that I have AIDs is dangerous*                                                                                     | 2.24(1.24)                           | 0.83                          |                                          |                                                 |                             |          |         |           |       |       |
| I do all I can to keep my AIDs (HIV) status secret                                                                                 | 2.90(1.22)                           | 0.46                          |                                          |                                                 |                             |          |         |           |       |       |
| I am very careful to that person I tell about my HIV status (I am cautious/ very careful to (?of) the people I tell my HIV status) | 3.60(0.78)                           | 0.21                          |                                          |                                                 |                             |          |         |           |       |       |
| <b>Concerns about Public Attitudes</b>                                                                                             |                                      |                               | 8.52(3.17)                               | 0.83 (95% CI;<br>0.80-0.86)                     | 0.79 (95% CI;<br>0.65-0.88) | 0.187**  | 0.165** |           |       |       |
| People who are suffering from AIDs are treated as if they are not like the other people.                                           | 3.05(1.18)                           | 0.68                          |                                          |                                                 |                             |          |         |           |       |       |
| People believe that a person infected with HIV is dirty.                                                                           | 2.74(1.26)                           | 0.84                          |                                          |                                                 |                             |          |         |           |       |       |
| Many people are worried when they are near a person infected with HIV.                                                             | 2.75(1.22)                           | 0.84                          |                                          |                                                 |                             |          |         |           |       |       |
| <b>Negative Self Image</b>                                                                                                         |                                      |                               | 6.32(3.00)                               | 0.74 (95% CI;<br>0.70-0.80)                     | 0.76 (95% CI;<br>0.60-0.86) | 0.372**  | 0.330** |           |       |       |
| I feel guilty because I am infected with HIV                                                                                       | 2.11(1.23)                           | 0.60                          |                                          |                                                 |                             |          |         |           |       |       |
| People’s attitudes about HIV/AIDs makes me feel very bad.                                                                          | 2.23(1.25)                           | 0.78                          |                                          |                                                 |                             |          |         |           |       |       |
| I feel I am not as good as others because I’m infected with HIV.                                                                   | 2.01(1.23)                           | 0.73                          |                                          |                                                 |                             |          |         |           |       |       |
| <b>Overall</b>                                                                                                                     |                                      |                               | 28.44(7.68)                              | 0.80(95% CI;<br>0.77-0.83)                      | 0.92(95% CI;<br>0.87-0.95)  | 0.368**  | 0.328** | 0.966     | 0.044 | 0.955 |

Pearson product-moment correlation coefficient; \*\*p<0.001; # correlation between HIV stigma and PHQ-9;  $\neq$  correlation between HIV stigma and GAD-7

<sup>a</sup>Possible score for each item 1-4; higher scores reflect a higher level of perceived HIV-related stigma

<sup>b</sup>Possible score 3-12 on each sub-scale; higher scores reflect a higher level of perceived HIV-related stigma. <sup>SD</sup> Standard deviation. CFI = Comparative Fit Index. RMSEA = Root Mean Square Error of Approximation and TLI=Tucker Lewis Index. Cronbach  $\alpha$ - Cronbach alpha

Table 3: Univariate linear Regression of correlates of perceived HIV-related stigma among adults living with HIV from rural Kilifi

| Independent variables                       | N   | Dependent variables |         |                     |         |                     |         |                     |         |                          |         |
|---------------------------------------------|-----|---------------------|---------|---------------------|---------|---------------------|---------|---------------------|---------|--------------------------|---------|
|                                             |     | Personalised Stigma |         | Disclosure concerns |         | Public attitudes    |         | Negative self-image |         | Overall HIV Stigma Score |         |
|                                             |     | B (95% CI)          | p-value | B (95% CI)          | p-value | B (95% CI)          | p-value | B (95% CI)          | p-value | B (95% CI)               | p-value |
| <b>Sociodemographic characteristics</b>     |     |                     |         |                     |         |                     |         |                     |         |                          |         |
| Age                                         | 450 | -0.01 (-0.03, 0.02) | 0.595   | 0.01 (-0.02, 0.02)  | 0.999   | 0.01 (-0.02, 0.04)  | 0.399   | -0.01(-0.03, 0.03)  | 0.880   | 0.01 (-0.07, 0.08)       | 0.910   |
| Gender                                      | 450 |                     |         |                     |         |                     |         |                     |         |                          |         |
| Male                                        |     | Ref                 |         | Ref                 |         | Ref                 |         | Ref                 |         | Ref                      |         |
| Female                                      |     | 0.52(-0.06, 1.10)   | 0.080*  | 0.29 (-0.25, 0.83)  |         | 1.07 (0.35, 1.79)   | 0.003** | 0.40 (-0.29, 1.08)  | 0.255   | 2.27 (0.54, 4.01)        | 0.010** |
| Marital Status                              | 450 |                     |         |                     |         |                     |         |                     |         |                          |         |
| Married                                     |     | Ref                 |         | Ref                 |         | Ref                 |         | Ref                 |         | Ref                      |         |
| Separated/Divorced/Widowed                  |     | 0.54(0.03, 1.04)    | 0.038** | 0.67(0.20, 1.14)    | 0.005** | 0.25(-0.38, 0.87)   | 0.442   | 0.73(0.14, 1.32)    | 0.016** | 2.18(0.67, 3.69)         | 0.005** |
| Single/never married                        |     | 0.61(-0.14, 1.37)   | 0.111*  | 0.17 (-0.52, 0.87)  | 0.626   | -0.43(-1.37, -0.51) | 0.369   | 0.40 (-0.49, 1.28)  | 0.378   | 0.75(-1.50, 3.01)        | 0.512   |
| Education Level                             | 450 |                     |         |                     |         |                     |         |                     |         |                          |         |
| Tertiary                                    |     | Ref                 |         | Ref                 |         | Ref                 |         | Ref                 |         | Ref                      |         |
| Secondary                                   |     | -0.12(-1.36, 1.12)  | 0.847   | 0.08 (-1.06, 1.21)  | 0.896   | 0.68(-0.84, 2.21)   | 0.380   | -0.03 (-1.46, 1.40) | 0.967   | 0.61(-3.05, 4.26)        | 0.745   |
| Primary                                     |     | -0.31(-1.43, 0.81)  | 0.582   | 0.48 (-0.55, 1.51)  | 0.360   | 1.32(-0.06, 2.70)   | 0.061*  | 0.72 (-0.57, 2.01)  | 0.273   | 2.20(-1.10, 5.51)        | 0.191*  |
| None                                        |     | 0.15(-1.01, 1.32)   | 0.794   | 1.23 (0.16, 2.30)   | 0.024** | 1.80(0.36, 3.23)    | 0.014** | 1.63 (0.29, 2.97)   | 0.018** | 4.81(1.38, 8.25)         | 0.006** |
| Employment Status                           | 450 |                     |         |                     |         |                     |         |                     |         |                          |         |
| Formally Employed                           |     | Ref                 |         | Ref                 |         | Ref                 |         | Ref                 |         | Ref                      |         |
| Self-employed                               |     | 0.67(-0.16, 1.50)   | 0.112*  | 0.27 (-0.50, 1.05)  | 0.490   | 0.46(-0.57, 1.49)   | 0.385   | 0.73*(-0.24, 1.70)  | 0.141*  | 2.13(-0.36, 4.62)        | 0.094*  |
| Other                                       |     | -0.67(-2.33, 0.99)  | 0.429   | -0.02 (-1.57, 1.53) | 0.983   | -1.14(-3.20, 0.93)  | 0.279   | -0.35 (-2.29, 1.60) | 0.726   | -2.17(-7.15, 2.81)       | 0.392   |
| Unemployed                                  |     | 0.51(-0.25, 1.26)   | 0.187*  | 0.33 (-0.37, 1.03)  | 0.360   | 0.18(-0.76, 1.11)   | 0.710   | 1.03 (0.15, 1.91)   | 0.022** | 2.04(-0.22, 4.30)        | 0.077*  |
| Currently living with                       | 450 |                     |         |                     |         |                     |         |                     |         |                          |         |
| Immediate family                            |     | Ref                 |         | Ref                 |         | Ref                 |         | Ref                 |         | Ref                      |         |
| Relative/friend                             |     | 0.86(-0.75, 2.47)   | 0.294   | 0.02(-1.47, 1.52)   | 0.975   | 0.18(-1.82, 2.18)   | 0.862   | -0.45(-2.34, 1.45)  | 0.644   | 0.62(-4.23, 5.46)        | 0.802   |
| Alone                                       |     | 0.01(-0.65, 0.66)   | 0.995   | -0.25(-0.87, 0.36)  | 0.414   | -0.06(-0.88, 0.76)  | 0.887   | -0.07(-0.84, 0.70)  | 0.860   | -0.38(-2.36, 1.60)       | 0.706   |
| Asset index score <sup>a</sup> – mean (SD)  | 450 | -0.12(-0.29-0.05)   | 0.171*  | -0.13(-0.29-0.03)   | 0.109*  | -0.11(-0.33-0.10)   | 0.310   | -0.12 (-0.32-0.08)  | 0.244*  | -0.48(-1.00-0.04)        | 0.068*  |
| Clinical characteristics                    |     |                     |         |                     |         |                     |         |                     |         |                          |         |
| BMI – kg/m <sup>2</sup> , mean (SD), OM = 4 |     | 0.004(-0.04, 0.05)  | 0.855   | -0.03(-0.07, 0.02)  | 0.244   | 0.03(-0.03, 0.09)   | 0.309   | -0.03(-0.18, 0.12)  | 0.708   | -0.03(-0.18, 0.12)       | 0.708   |
| Viral Load OM = 145                         | 305 |                     |         |                     |         |                     |         |                     |         |                          |         |
| ≤ 1000 copies/ml                            |     | Ref                 |         | Ref                 |         | Ref                 |         | Ref                 |         | Ref                      |         |
| > 1000 copies/ml                            |     | 0.58(-0.28, 1.44)   | 0.183*  | 0.10(-0.70, 0.90)   |         | 0.07(-1.00, 1.14)   | 0.894   | 1.05 (0.08, 2.02)   | 0.033** | 1.81(-0.79, 4.40)        | 0.172*  |

|                                         |     |                   |          |                      |          |                   |        |                      |          |                     |          |
|-----------------------------------------|-----|-------------------|----------|----------------------|----------|-------------------|--------|----------------------|----------|---------------------|----------|
| Months since HIV diagnosis              | 450 | 0.00(-0.00, 0.01) | 0.346    | -0.01 (-0.01, -0.00) | 0.001**  | -0.00(-0.01,0.00) | 0.630  | -0.01 (-0.01,0.00)   | 0.057*   | -0.01(0.03,0.00)    | 0.091*   |
| Months since cART initiation<br>OM = 4  | 446 | 0.00(-0.00,0.01)  | 0.497    | -0.01 (-0.01, -0.00) | 0.001*** | -0.00(-0.01,0.00) | 0.202* | -0.01 (-0.01, -0.00) | 0.031**  | -0.02(-0.03, -0.00) | 0.031**  |
| <b>Treatment characteristics</b>        |     |                   |          |                      |          |                   |        |                      |          |                     |          |
| HIV status disclosure                   | 450 |                   |          |                      |          |                   |        |                      |          |                     |          |
| Yes                                     |     | Ref               |          | Ref                  |          | Ref               |        | Ref                  |          | Ref                 |          |
| No                                      |     | 0.23(-0.77,1.23)  | 0.651    | 1.86 (0.94,2.77)     | 0.000*** | 0.67(-0.57,1.91)  | 0.287  | 0.72(-0.45,1.89)     | 0.228    | 3.47(0.49,6.46)     | 0.022**  |
| Any current opportunistic<br>infections | 450 |                   |          |                      |          |                   |        |                      |          |                     |          |
| No                                      |     | Ref               |          | Ref                  |          | Ref               |        | Ref                  |          | Ref                 |          |
| Yes                                     |     | 0.65(0.04,1.26)   | 0.037**  | 0.09(-0.48,0.65)     | 0.786    | 0.12(-0.64,0.88)  | 0.759  | 0.87 (0.16,1.59)     | 0.017**  | 1.72(-0.11,3.55)    | 0.065*   |
| CMD comorbidity OM = 48                 | 402 |                   |          |                      |          |                   |        |                      |          |                     |          |
| Absence                                 |     | Ref               |          | Ref                  |          | Ref               |        | Ref                  |          | Ref                 |          |
| Presence                                |     | 2.71(1.58, 3.84)  | 0.000*** | 0.18 (-0.91, 1.28)   | 0.741    | 1.09(-0.38, 2.55) | 0.144* | 3.07 (1.76, 4.39)    | 0.000*** | 7.06(3.71,10.41)    | 0.000*** |

Notes: Overall stigma scale represents the sum of all twelve items from the four subscales; A negative stigma score indicates less stigma. *CMD* – symptoms of depression and anxiety, *BMI* body mass index, *WHO* World Health Organisation, *Ref*- Reference category, *OM* observation with missing value, cART combination antiretroviral therapy, *a* score range = 0 to 7, *b* score range = 12 to 48. \* p < 0.25; \*\* p < 0.05; \*\*\* p < 0.001

Table 4: Multivariate linear Regression of correlates of perceived HIV-related stigma among adults living with HIV from rural Kilifi

| Independent variables                            | Dependent variables         |          |                             |          |                          |         |                             |          |                                  |          |
|--------------------------------------------------|-----------------------------|----------|-----------------------------|----------|--------------------------|---------|-----------------------------|----------|----------------------------------|----------|
|                                                  | Personalised stigma (n=402) |          | Disclosure concerns (n=450) |          | Public attitudes (n=450) |         | Negative self-image (n=402) |          | Overall HIV Stigma Score (n=402) |          |
|                                                  | B (95% CI)                  | p-value  | B (95% CI)                  | p-value  | B (95% CI)               | p-value | B (95% CI)                  | p-value  | B (95% CI)                       | p-value  |
| <b>Sociodemographic characteristics</b>          |                             |          |                             |          |                          |         |                             |          |                                  |          |
| Gender                                           |                             |          |                             |          |                          |         |                             |          |                                  |          |
| Male                                             | Ref                         |          |                             |          | Ref                      |         |                             |          | Ref                              |          |
| Female                                           | 0.75(0.17, 1.34)            | 0.012**  |                             |          | 1.07(0.35,1.79)          | 0.003** |                             |          | 2.00(0.21,3.80)                  | 0.029**  |
| Education Level                                  |                             |          |                             |          |                          |         |                             |          |                                  |          |
| Tertiary                                         |                             |          | Ref                         |          |                          |         | Ref                         |          | Ref                              |          |
| Secondary                                        |                             |          | -0.04(-1.14,1.07)           | 0.950    |                          |         | -0.05(-1.44,1.33)           | 0.939    | -0.34(-3.83,3.16)                | 0.850    |
| Primary                                          |                             |          | 0.48(-0.52,1.48)            | 0.346    |                          |         | 0.51(-0.73,1.74)            | 0.423    | 1.37(-1.75,4.50)                 | 0.388    |
| None                                             |                             |          | 1.24(0.20,2.28)             | 0.019**  |                          |         | 1.33(0.04, 2.62)            | 0.044**  | 3.32(-0.01,6.65)                 | 0.051    |
| <b>Clinical characteristics</b>                  |                             |          |                             |          |                          |         |                             |          |                                  |          |
| Months since HIV diagnosis                       |                             |          | -0.01(-0.01, -0.00)         | 0.007**  |                          |         |                             |          |                                  |          |
| <b>Treatment characteristics</b>                 |                             |          |                             |          |                          |         |                             |          |                                  |          |
| HIV status disclosure                            |                             |          |                             |          |                          |         |                             |          |                                  |          |
| Yes                                              |                             |          | Ref                         |          |                          |         |                             |          | Ref                              |          |
| No                                               |                             |          | 1.79(0.88,2.70)             | 0.000*** |                          |         |                             |          | 4.24(1.27,7.20)                  | 0.005**  |
| CMD comorbidity                                  |                             |          |                             |          |                          |         |                             |          |                                  |          |
| Absence                                          | Ref                         |          |                             |          |                          |         | Ref                         |          | Ref                              |          |
| Presence                                         | 2.67(1.55, 3.79)            | 0.000*** |                             |          |                          |         | 3.04(1.74, 4.34)            | 0.000*** | 6.67(3.40,9.94)                  | 0.000*** |
| Variance explained by the model Pseudo R-squared | 6.76%                       |          | 8.66%                       |          | 1.89%                    |         | 7.71%                       |          | 10.17%                           |          |

Notes: Overall stigma scale represents the sum of all twelve items from the four sub-scales. CMD – symptoms of depression and anxiety, 95% CI - 95% confidence interval, Ref-reference category \*\*p<0.05, \*\*\*p<0.001

Table 5: Multi-Group Confirmatory Factor Analysis for age and gender sub-groups

| Invariance Steps      | Gender | RMSEA | TLI   | CFI   | ΔCFI  | Age          | RMSEA | TLI   | CFI   | ΔCFI  |
|-----------------------|--------|-------|-------|-------|-------|--------------|-------|-------|-------|-------|
| Configural Invariance | Female | 0.051 | 0.934 | 0.950 |       | Older adults | 0.040 | 0.960 | 0.970 |       |
|                       | Male   | 0.051 | 0.934 | 0.950 |       | Young Adults | 0.040 | 0.960 | 0.970 |       |
| Metric Invariance     | Female | 0.052 | 0.932 | 0.943 | 0.007 | Older adults | 0.042 | 0.957 | 0.964 | 0.006 |
|                       | Male   | 0.052 | 0.932 | 0.943 | 0.007 | Young Adults | 0.042 | 0.957 | 0.964 | 0.006 |
| Scalar Invariance     | Female | 0.050 | 0.936 | 0.943 | 0.000 | Older adults | 0.041 | 0.959 | 0.963 | 0.001 |
|                       | Male   | 0.050 | 0.936 | 0.943 | 0.000 | Young Adults | 0.041 | 0.959 | 0.963 | 0.001 |
| Strict Invariance     | Female | 0.048 | 0.941 | 0.942 | 0.001 | Older adults | 0.041 | 0.959 | 0.960 | 0.003 |
|                       | Male   | 0.048 | 0.941 | 0.942 | 0.001 | Young Adults | 0.041 | 0.959 | 0.960 | 0.003 |

Notes: Criteria for an acceptable fit were a root mean square error of approximation (RMSEA) of < 0.06, and a comparative fit index (CFI), and a Tucker-Lewis index (TLI) of ≥0.90. Configural invariance - no constraints; Full metric invariance - with all factor loadings constrained equal. Scalar invariance - with all intercepts constrained equal; Strict invariance – with all factor loadings and intercepts fixed; Measurement invariance is assumed when ΔCFI is ≤0.01

Figure Legends

Supplementary Figure 1: Confirmatory factor analysis of the short version of the HIV Stigma Scale. Results show correlations between subscales (circles) and maximum likelihood estimates for the relation between subscales and items (rectangles). Sample (n = 435). Maximum likelihood estimates are standardised

Figure 1: Study recruitment flow chart

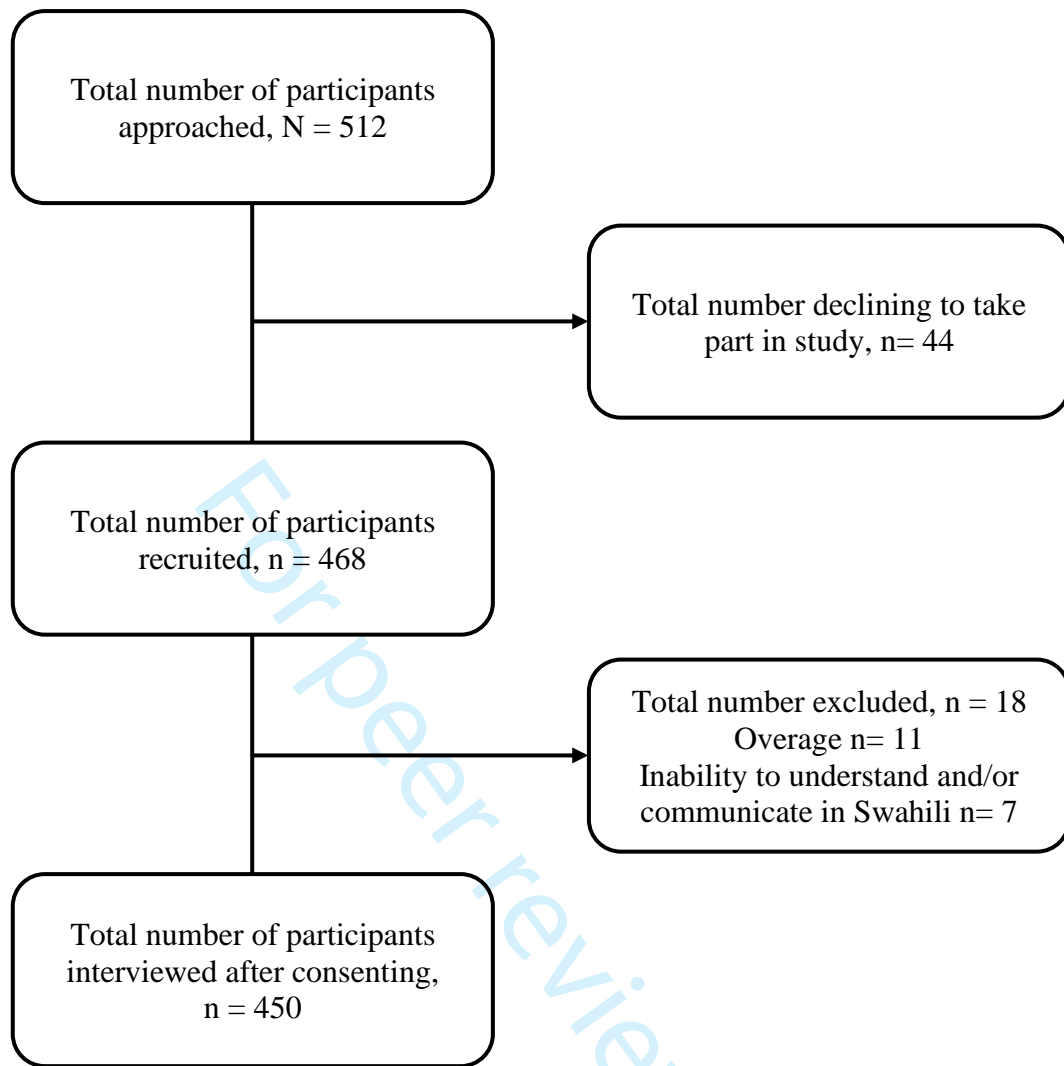

Figure 1: Study recruitment flow chart





Supplementary Figure 1: Confirmatory factor analysis of the short version of the HIV Stigma Scale. Results show correlations between subscales (circles) and maximum likelihood estimates for the relation between subscales and items (rectangles). Sample (n = 435). Maximum likelihood estimates are standardised

**STROBE 2007 (v4) Statement—Checklist of items that should be included in reports of *cross-sectional studies***

| Section/Topic                | Item # | Recommendation                                                                                                                                                                       | Reported on page # |
|------------------------------|--------|--------------------------------------------------------------------------------------------------------------------------------------------------------------------------------------|--------------------|
| <b>Title and abstract</b>    | 1      | (a) Indicate the study's design with a commonly used term in the title or the abstract                                                                                               | 2                  |
|                              |        | (b) Provide in the abstract an informative and balanced summary of what was done and what was found                                                                                  | 2                  |
| <b>Introduction</b>          |        |                                                                                                                                                                                      |                    |
| Background/rationale         | 2      | Explain the scientific background and rationale for the investigation being reported                                                                                                 | 4-5                |
| Objectives                   | 3      | State specific objectives, including any prespecified hypotheses                                                                                                                     | 5                  |
| <b>Methods</b>               |        |                                                                                                                                                                                      |                    |
| Study design                 | 4      | Present key elements of study design early in the paper                                                                                                                              | 5                  |
| Setting                      | 5      | Describe the setting, locations, and relevant dates, including periods of recruitment, exposure, follow-up, and data collection                                                      | 5-8                |
| Participants                 | 6      | (a) Give the eligibility criteria, and the sources and methods of selection of participants                                                                                          | 6                  |
| Variables                    | 7      | Clearly define all outcomes, exposures, predictors, potential confounders, and effect modifiers. Give diagnostic criteria, if applicable                                             | 6-8                |
| Data sources/<br>measurement | 8*     | For each variable of interest, give sources of data and details of methods of assessment (measurement). Describe comparability of assessment methods if there is more than one group | 6-8                |
| Bias                         | 9      | Describe any efforts to address potential sources of bias                                                                                                                            | 6&8                |
| Study size                   | 10     | Explain how the study size was arrived at                                                                                                                                            | 6                  |
| Quantitative variables       | 11     | Explain how quantitative variables were handled in the analyses. If applicable, describe which groupings were chosen and why                                                         | 9                  |
| Statistical methods          | 12     | (a) Describe all statistical methods, including those used to control for confounding                                                                                                | 8-10               |
|                              |        | (b) Describe any methods used to examine subgroups and interactions                                                                                                                  | N/A                |
|                              |        | (c) Explain how missing data were addressed                                                                                                                                          | N/A                |
|                              |        | (d) If applicable, describe analytical methods taking account of sampling strategy                                                                                                   | 8-9                |
|                              |        | (e) Describe any sensitivity analyses                                                                                                                                                | N/A                |
| <b>Results</b>               |        |                                                                                                                                                                                      |                    |

|                          |     |                                                                                                                                                                                                              |       |
|--------------------------|-----|--------------------------------------------------------------------------------------------------------------------------------------------------------------------------------------------------------------|-------|
| Participants             | 13* | (a) Report numbers of individuals at each stage of study—eg numbers potentially eligible, examined for eligibility, confirmed eligible, included in the study, completing follow-up, and analysed            | 29    |
|                          |     | (b) Give reasons for non-participation at each stage - see details in figure 1                                                                                                                               | 29    |
|                          |     | (c) Consider use of a flow diagram                                                                                                                                                                           | 29    |
| Descriptive data         | 14* | (a) Give characteristics of study participants (eg demographic, clinical, social) and information on exposures and potential confounders                                                                     | 10    |
|                          |     | (b) Indicate number of participants with missing data for each variable of interest                                                                                                                          | 23    |
| Outcome data             | 15* | Report numbers of outcome events or summary measures                                                                                                                                                         |       |
| Main results             | 16  | (a) Give unadjusted estimates and, if applicable, confounder-adjusted estimates and their precision (eg, 95% confidence interval). Make clear which confounders were adjusted for and why they were included | 25-27 |
|                          |     | (b) Report category boundaries when continuous variables were categorized - see details in Table 1                                                                                                           | 23    |
|                          |     | (c) If relevant, consider translating estimates of relative risk into absolute risk for a meaningful time period                                                                                             | N/A   |
| Other analyses           | 17  | Report other analyses done—eg analyses of subgroups and interactions, and sensitivity analyses                                                                                                               | N/A   |
| <b>Discussion</b>        |     |                                                                                                                                                                                                              |       |
| Key results              | 18  | Summarise key results with reference to study objectives                                                                                                                                                     | 10    |
| Limitations              | 19  | Discuss limitations of the study, taking into account sources of potential bias or imprecision. Discuss both direction and magnitude of any potential bias                                                   | 15    |
| Interpretation           | 20  | Give a cautious overall interpretation of results considering objectives, limitations, multiplicity of analyses, results from similar studies, and other relevant evidence                                   | 12-15 |
| Generalisability         | 21  | Discuss the generalisability (external validity) of the study results                                                                                                                                        | 15    |
| <b>Other information</b> |     |                                                                                                                                                                                                              |       |
| Funding                  | 22  | Give the source of funding and the role of the funders for the present study and, if applicable, for the original study on which the present article is based                                                | 16    |

\*Give information separately for cases and controls in case-control studies and, if applicable, for exposed and unexposed groups in cohort and cross-sectional studies.

**Note:** An Explanation and Elaboration article discusses each checklist item and gives methodological background and published examples of transparent reporting. The STROBE checklist is best used in conjunction with this article (freely available on the Web sites of PLoS Medicine at <http://www.plosmedicine.org/>, Annals of Internal Medicine at <http://www.annals.org/>, and Epidemiology at <http://www.epidem.com/>). Information on the STROBE Initiative is available at [www.strobe-statement.org](http://www.strobe-statement.org).
